# Supplementary material for: Comparative Evaluation of the Effect of Metformin and Insulin on Gut Microbiota and Metabolome Profiles of Type 2 Diabetic Rats Induced by the Combination of Streptozotocin and High-Fat Diet
Source: Front Pharmacol. 2022 Jan 3;12:794103. doi: 10.3389/fphar.2021.794103 (PMC8762251; doi:10.3389/fphar.2021.794103)
Supplement: Supplementary file 1 [file Table2.XLSX]

## Sheet: CON vs DM
ID	Metabolite	Metab ID	KEGG Compound ID	Library ID	M/Z	Mode	Adducts	Formula	Retention time	RSD	Fragmentation Score	Theoretical Fragmentation Score	Mass Error	CAS ID	KEGG Compound First Category	KEGG Compound Second Category	KEGG Pathway ID	KEGG Pathway Description	KEGG Pathway First Category	KEGG Pathway Second Category	HMDB Superclass	HMDB Class	HMDB Subclass	CON_1	CON_2	CON_3	CON_4	CON_5	CON_6	DM_1	DM_2	DM_3	DM_4	DM_5
pos_179	Aniline	metab_13	C00292	HMDB0003012	94.0641	pos	-	-	270.065	0.0442739	-	-	-	62-53-3	-	-	-	-	-	-	Benzenoids	Benzene and substituted derivatives	Aniline and substituted anilines	4.4646	4.4455	4.4504	4.283	4.4004	4.3889	4.2099	4.1178	4.2533	4.2493	4.3666
pos_661	5,6-Dihydro-5-fluorouracil	metab_74	C16630	HMDB0060402	133.03	pos	-	-	265.959	0.0392876	-	-	-	-	-	-	map00983	Drug metabolism - other enzymes	Metabolism	Xenobiotics biodegradation and metabolism	Organoheterocyclic compounds	Diazines	Pyrimidines and pyrimidine derivatives	4.6109	4.61	4.576	4.688	4.7012	4.6361	4.3988	4.5485	4.4378	4.4989	4.509
pos_939	D-Xylose	metab_117	C00181	HMDB0000098	151.06	pos	-	-	103.087	0.0329848	-	-	-	58-86-6	Carbohydrates	Monosaccharides	map01100;map00520;map00040;map02010	Metabolic pathways; Amino sugar and nucleotide sugar metabolism; Pentose and glucuronate interconversions; ABC transporters	Metabolism;Metabolism;Metabolism;Environmental Information Processing	Global and overview maps;Carbohydrate metabolism;Carbohydrate metabolism;Membrane transport	Organic oxygen compounds	Organooxygen compounds	Carbohydrates and carbohydrate conjugates	4.8611	4.9621	4.8388	4.8555	4.7072	4.7978	4.8853	4.9644	5.0557	5.093	5.0384
pos_1287	4-Hydroxy-1H-indole-3-acetonitrile	metab_173	-	HMDB0038462	173.07	pos	-	-	227.156	0.0762335	-	-	-	118573-52-7	-	-	-	-	-	-	Organoheterocyclic compounds	Indoles and derivatives	Hydroxyindoles	4.3448	4.5169	4.2783	4.5667	4.5112	4.5405	4.2637	4.2458	4.3312	4.2315	4.3182
pos_1318	N-Acetylasparagine	metab_180	-	HMDB0006028	175.07	pos	-	-	378.493	0.096967	-	-	-	4033-40-3	-	-	-	-	-	-	Organic acids and derivatives	Carboxylic acids and derivatives	Amino acids, peptides, and analogues	4.5212	4.6574	4.5759	4.3337	4.3409	4.3783	4.812	4.5828	4.6839	4.7858	4.7115
pos_1457	Epinephrine	metab_197	C00788	HMDB0000068	184.093	pos	-	-	336.137	0.161058	-	-	-	51-43-4	Hormones and transmitters;Hormones and transmitters	Other hormones;Neurotransmitters	map01100;map04261;map04080;map04024;map04923;map04924;map00350	Metabolic pathways; Adrenergic signaling in cardiomyocytes; Neuroactive ligand-receptor interaction; cAMP signaling pathway; Regulation of lipolysis in adipocytes; Renin secretion; Tyrosine metabolism	Metabolism;Organismal Systems;Environmental Information Processing;Environmental Information Processing;Organismal Systems;Organismal Systems;Metabolism	Global and overview maps;Circulatory system;Signaling molecules and interaction;Signal transduction;Endocrine system;Endocrine system;Amino acid metabolism	Benzenoids	Phenols	Benzenediols	5.2263	5.1914	5.0596	5.2934	5.2723	5.1483	5.0277	4.9172	4.8645	5.134	5.149
pos_1483	N-Acetyl-b-D-galactosamine	metab_200	C05021	HMDB0000853	186.075	pos	-	-	245.004	0.0470911	-	-	-	14131-60-3	-	-	-	-	-	-	Organic oxygen compounds	Organooxygen compounds	Carbohydrates and carbohydrate conjugates	4.1037	4.2167	4.1168	4.1861	4.0537	4.1121	4.2597	4.245	4.3303	4.3663	4.1548
pos_1600	2,4-Dichlorobenzoate	metab_220	C06670	-	192.023	pos	-	-	376.556	0.0526547	-	-	-	-	-	-	map01100	Metabolic pathways	Metabolism	Global and overview maps	-	-	-	4.0333	3.9558	3.9438	4.1475	4.0994	4.0366	3.8302	3.8938	3.8183	3.8486	4.0269
pos_2122	Methyl 3-carbazolecarboxylate	metab_284	-	HMDB0029744	226.083	pos	-	-	368.339	0.0170214	-	-	-	97931-41-4	-	-	-	-	-	-	Organoheterocyclic compounds	Indoles and derivatives	Carbazoles	4.9536	5.063	5.0109	5.1161	5.0237	4.9571	4.8785	4.8091	4.7273	4.847	4.9883
pos_2271	Gamma-Aminobutyryl-lysine	metab_304	-	HMDB0001959	232.153	pos	-	-	239.605	0.0392249	-	-	-	22468-02-6	-	-	-	-	-	-	Organic acids and derivatives	Peptidomimetics	Hybrid peptides	5.8942	6.0934	5.7869	5.953	6.0002	6.2434	5.4643	5.4314	5.5028	5.5446	5.8198
pos_2366	Oxamyl	metab_313	C18419	-	237.101	pos	-	-	23.6965	0.134252	-	-	-	-	-	-	-	-	-	-	-	-	-	4.7625	4.7004	4.6896	4.7197	4.6061	4.6442	4.2454	4.4549	4.479	4.2315	4.3421
pos_2529	Lysyl-Proline	metab_331	-	HMDB0028959	244.153	pos	-	-	233.304	0.0222331	-	-	-	-	-	-	-	-	-	-	Organic acids and derivatives	Carboxylic acids and derivatives	Amino acids, peptides, and analogues	4.0486	4.1343	4.0547	3.9132	3.9337	4.023	3.581	3.5124	3.5392	3.8966	3.862
pos_2557	Verruculotoxin	metab_339	C10624	-	245.159	pos	-	-	314.792	0.0344669	-	-	-	-	-	-	-	-	-	-	-	-	-	4.4556	4.5611	4.3597	4.473	4.256	4.3521	4.5572	4.5799	4.5405	4.602	4.4832
pos_2583	Acetylisoniazid	metab_340	C07585	HMDB0041821	246.133	pos	-	-	152.25	0.122752	-	-	-	1078-38-2	-	-	map00983	Drug metabolism - other enzymes	Metabolism	Xenobiotics biodegradation and metabolism	Organoheterocyclic compounds	Pyridines and derivatives	Pyridinecarboxylic acids and derivatives	4.8034	4.9266	5.0876	4.5073	4.5305	4.4613	5.2205	5.0732	5.173	5.4005	4.6966
pos_2621	Avocadynofuran	metab_346	-	HMDB0030933	247.2	pos	-	-	255.788	0.0437827	-	-	-	24708-33-6	-	-	-	-	-	-	Organoheterocyclic compounds	Heteroaromatic compounds	Not Available	4.5386	4.4354	4.5335	4.3858	4.5867	4.4315	4.6357	4.5661	4.7993	4.7707	4.8801
pos_2683	(S)-Spirobrassinin	metab_359	-	HMDB0035974	251.035	pos	-	-	278.171	0.0691663	-	-	-	-	-	-	-	-	-	-	Organoheterocyclic compounds	Indoles and derivatives	Indolines	4.4109	4.3231	4.3047	4.5753	4.4476	4.5132	3.5491	3.9574	3.721	3.7495	4.0053
pos_2889	N-(1-Deoxy-1-fructosyl)glycine	metab_377	-	HMDB0037848	260.073	pos	-	-	370.26	0.132098	-	-	-	60644-20-4	-	-	-	-	-	-	Organic oxygen compounds	Organooxygen compounds	Carbohydrates and carbohydrate conjugates	4.8696	4.9541	4.8797	4.5194	4.5527	4.5537	5.1802	4.976	5.1113	5.1548	4.7373
pos_2925	Panaxydol	metab_384	-	LMFA05000028;HMDB0034000	261.18	pos	-	-	256.096	0.0657517	-	-	-	72800-72-7	-	-	-	-	-	-	Lipids and lipid-like molecules	Fatty Acyls	Fatty alcohols	4.4401	4.3578	4.2776	4.2362	4.4403	4.2982	4.6499	4.5612	4.9279	4.7528	4.8812
pos_2947	O-Phosphotyrosine	metab_389	C06501	HMDB0006049	262.164	pos	-	-	287.365	0.0450017	-	-	-	-	-	-	-	-	-	-	Organic acids and derivatives	Carboxylic acids and derivatives	Amino acids, peptides, and analogues	4.8919	4.9798	4.8152	4.7591	4.817	4.9315	4.4637	4.5624	4.3635	4.4643	4.5762
pos_3079	Neuraminic acid	metab_402	C06469	HMDB0000830	268.102	pos	-	-	373.492	0.0982322	-	-	-	114-04-5	Carbohydrates	Monosaccharides	-	-	-	-	Organic oxygen compounds	Organooxygen compounds	Carbohydrates and carbohydrate conjugates	4.9728	5.0606	5.0285	4.7004	4.7172	4.7682	5.4411	5.2696	5.3748	5.5181	5.0919
pos_3089	Thiaburimamide	metab_404	C11800	-	269.03	pos	-	-	222.282	0.252985	-	-	-	-	-	-	-	-	-	-	-	-	-	3.2298	3.3263	3.1774	3.3247	3.2482	3.2915	3.7883	3.8348	3.8075	3.3031	3.2737
pos_3208	(2E)-Piperamide-C5:1	metab_414	-	HMDB0038834	274.138	pos	-	-	299.093	0.0572872	-	-	-	117137-65-2	-	-	-	-	-	-	Organoheterocyclic compounds	Benzodioxoles	Not Available	4.4717	4.4599	4.2143	3.8964	3.9123	4.1358	4.6181	4.5171	4.6534	4.9694	4.6187
pos_3379	Ajocysteine	metab_427	-	HMDB0041052	282.021	pos	-	-	186.631	0.10307	-	-	-	-	-	-	-	-	-	-	Organic acids and derivatives	Carboxylic acids and derivatives	Amino acids, peptides, and analogues	3.2864	3.1858	3.0274	3.5701	3.254	3.8683	3.7657	4.288	3.7677	3.9375	3.8295
pos_3474	Leu-Gly-Pro	metab_442	C01833	-	286.174	pos	-	-	278.179	0.141021	-	-	-	-	-	-	-	-	-	-	-	-	-	3.6027	3.3606	3.442	3.7823	3.8479	3.8152	3.1062	3.2063	3.4047	3.5172	3.555
pos_3600	Margaroylglycine	metab_459	-	HMDB0013246	292.262	pos	-	-	40.8545	0.110922	-	-	-	-	-	-	-	-	-	-	Organic acids and derivatives	Carboxylic acids and derivatives	Amino acids, peptides, and analogues	4.2716	4.1445	4.1193	3.8536	4.128	4.4687	4.1096	4.7214	4.7124	4.6816	4.7683
pos_3827	N-(1-Deoxy-1-fructosyl)threonine	metab_486	-	HMDB0037843	304.099	pos	-	-	357.524	0.10602	-	-	-	70954-04-0	-	-	-	-	-	-	Organic oxygen compounds	Organooxygen compounds	Carbohydrates and carbohydrate conjugates	4.6885	4.8271	4.845	4.2357	4.4401	4.4695	5.0845	4.993	5.0412	5.0948	4.4724
pos_3922	1-[(5-Amino-5-carboxypentyl)amino]-1-deoxyfructose	metab_499	-	HMDB0034879	309.165	pos	-	-	450.743	0.275637	-	-	-	21291-40-7	-	-	-	-	-	-	Organic oxygen compounds	Organooxygen compounds	Carbohydrates and carbohydrate conjugates	5.0698	5.2127	5.1665	4.8323	4.8106	4.7946	5.3796	5.3457	5.3459	5.5564	5.0213
pos_4046	Alizapride	metab_515	-	HMDB0015494	316.174	pos	-	-	356.414	0.0426828	-	-	-	59338-93-1	-	-	-	-	-	-	Organoheterocyclic compounds	Benzotriazoles	Not Available	3.4633	3.6553	3.5118	3.5472	3.4765	3.5681	3.5293	3.831	3.6918	3.9868	3.7246
pos_4080	N-(1-Deoxy-1-fructosyl)valine	metab_521	-	HMDB0037844	318.094	pos	-	-	314.684	0.0870837	-	-	-	-	-	-	-	-	-	-	Organic acids and derivatives	Carboxylic acids and derivatives	Amino acids, peptides, and analogues	4.1591	4.249	4.3239	3.6252	3.8227	3.8855	4.8281	4.6998	4.7787	4.725	3.8945
pos_4131	Linezolid	metab_527	C08146	HMDB0014739	320.144	pos	-	-	382.07	0.128309	-	-	-	165800-03-3	-	-	-	-	-	-	Organoheterocyclic compounds	Oxazinanes	Morpholines	4.2825	4.4415	4.4875	4.0086	3.9951	4.083	4.7872	4.6039	4.7528	4.8876	4.2614
pos_4401	1-(sn-Glycero-3-phospho)-1D-myo-inositol	metab_558	-	-	335.219	pos	-	-	47.202	0.0322301	-	-	-	-	-	-	-	-	-	-	-	-	-	4.2121	4.3084	4.2416	4.3148	4.3676	4.1748	4.2751	3.9937	4.1356	3.8543	3.9962
pos_4571	2-Dodecylbenzenesulfonic acid	metab_584	-	HMDB0031031	344.227	pos	-	-	84.284	0.2363	-	-	-	-	-	-	-	-	-	-	Benzenoids	Benzene and substituted derivatives	Benzenesulfonic acids and derivatives	5.7707	5.794	5.7181	5.4102	5.3506	5.6379	6.0521	5.7571	5.7712	5.8539	5.87
pos_4714	Resolvin E1	metab_602	C18171	LMFA03140003;HMDB0010410	351.21	pos	-	-	436.792	0.115916	-	-	-	-	-	-	-	-	-	-	Lipids and lipid-like molecules	Fatty Acyls	Eicosanoids	4.6106	4.8104	4.6623	4.2466	4.2601	4.4282	4.7816	4.8459	5.0076	5.1029	4.5694
pos_4774	Olopatadine n-oxide	metab_608	-	HMDB0060595	354.16	pos	-	-	310.42	0.0432813	-	-	-	-	-	-	-	-	-	-	Organic acids and derivatives	Organic sulfuric acids and derivatives	Arylsulfates	3.5201	3.6006	3.511	3.3853	3.2338	3.3829	3.6471	3.8705	3.933	3.8754	3.8141
pos_4795	2-O-p-Coumaroylhydroxycitric acid	metab_609	-	HMDB0040570	355.262	pos	-	-	209.801	0.0549409	-	-	-	62345-85-1	-	-	-	-	-	-	Phenylpropanoids and polyketides	Cinnamic acids and derivatives	Hydroxycinnamic acids and derivatives	4.5879	3.9557	4.5073	4.1837	4.5382	5.0024	4.7411	4.5827	5.1172	5.0102	4.989
pos_4871	Dulciol D	metab_618	-	HMDB0029791	359.09	pos	-	-	354.687	0.0678627	-	-	-	175617-26-2	-	-	-	-	-	-	Organoheterocyclic compounds	Benzopyrans	1-benzopyrans	3.9924	4.0708	4.0333	4.1112	4.1106	4.2377	3.7467	3.8242	3.7646	3.8401	4.151
pos_4903	2-Hydroxylauroylcarnitine	metab_621	-	LMFA07070032;HMDB0013164	360.273	pos	-	-	191.534	0.0202889	-	-	-	-	-	-	-	-	-	-	Lipids and lipid-like molecules	Fatty Acyls	Fatty acid esters	3.6078	3.5711	3.5641	3.6462	3.4305	3.811	3.6673	3.7655	3.7809	3.7851	3.827
pos_4928	Fenoxaprop-ethyl	metab_622	C11024	-	362.083	pos	-	-	367.119	0.0492227	-	-	-	-	-	-	-	-	-	-	-	-	-	4.9937	5.1145	5.0444	5.1068	5.0252	5.0238	4.8861	4.8869	4.7628	4.8891	5.0456
pos_4990	Gerberinol	metab_628	-	HMDB0033304	365.104	pos	-	-	348.012	0.0277908	-	-	-	84153-78-6	-	-	-	-	-	-	Phenylpropanoids and polyketides	Coumarins and derivatives	Hydroxycoumarins	3.5452	3.6262	3.4145	3.5072	3.3914	3.4792	4.255	3.7027	4.8618	3.8407	3.5534
pos_4993	Xanthylic acid	metab_629	C00655	HMDB0001554	365.202	pos	-	-	407.304	0.127674	-	-	-	523-98-8	-	-	map01100;map00230	Metabolic pathways; Purine metabolism	Metabolism;Metabolism	Global and overview maps;Nucleotide metabolism	Nucleosides, nucleotides, and analogues	Purine nucleotides	Purine ribonucleotides	4.7392	4.8478	4.8028	4.364	4.469	4.514	5.0688	4.9839	5.1132	5.1861	4.6424
pos_5048	7,9-Tetracosanedione	metab_636	-	HMDB0035560	367.352	pos	-	-	27.191	0.214647	-	-	-	-	-	-	-	-	-	-	Organic oxygen compounds	Organooxygen compounds	Carbonyl compounds	3.4358	3.6896	3.4132	3.4869	3.5399	3.5982	3.8118	4.0118	4.0596	3.6498	3.9965
pos_5091	20-Tetracosene-1,18-diol	metab_640	-	HMDB0040887	369.369	pos	-	-	25.054	0.0888876	-	-	-	151454-15-8	-	-	-	-	-	-	Lipids and lipid-like molecules	Fatty Acyls	Fatty alcohols	3.9108	3.9727	3.9231	3.9089	3.7152	4.0035	4.328	4.4224	4.5026	4.0209	3.8628
pos_5108	trans-2-Tetradecenoylcarnitine	metab_641	-	HMDB0013329	370.294	pos	-	-	159.977	0.0273932	-	-	-	-	-	-	-	-	-	-	Organic acids and derivatives	Hydroxy acids and derivatives	Beta hydroxy acids and derivatives	4.4208	4.3643	4.4763	4.5051	4.5133	4.6901	4.7717	4.6361	4.8115	4.648	4.855
pos_5123	Spiromesifen	metab_644	C18488	-	371.226	pos	-	-	91.249	0.22412	-	-	-	-	-	-	-	-	-	-	-	-	-	5.1031	5.0926	5.0436	4.7772	4.7523	4.9827	5.2386	5.1262	5.0801	5.1969	5.2016
pos_5184	Dodecanedioylcarnitine	metab_653	-	HMDB0013327	374.252	pos	-	-	218.644	0.11044	-	-	-	-	-	-	-	-	-	-	Organic acids and derivatives	Carboxylic acids and derivatives	Tricarboxylic acids and derivatives	3.6041	3.7154	3.588	3.4047	3.4392	3.4866	3.164	3.1202	3.3856	3.421	3.2727
pos_5215	Haloxyfop methyl	metab_655	C11031	-	376.05	pos	-	-	277.934	0.0475649	-	-	-	-	-	-	-	-	-	-	-	-	-	3.9478	3.875	3.8719	4.156	4.052	4.0826	3.0676	3.574	3.3227	3.4478	3.5911
pos_5367	(+)-12a-Hydroxypachyrrhizone	metab_664	-	HMDB0030774	383.329	pos	-	-	32.868	0.221427	-	-	-	28768-44-7	-	-	-	-	-	-	Phenylpropanoids and polyketides	Isoflavonoids	Rotenoids	3.9744	4.0978	4.0077	4.1781	4.0966	4.1953	4.4227	4.8313	4.8744	4.4691	4.386
pos_5421	(-)-Epigallocatechin sulfate	metab_675	-	HMDB0012468	386.324	pos	-	-	157.33	0.0378621	-	-	-	-	-	-	-	-	-	-	Phenylpropanoids and polyketides	Flavonoids	Sulfated flavonoids	3.8536	3.7879	3.8985	3.7963	4.0098	4.0312	3.64	3.6393	3.8496	3.6009	3.8085
pos_5520	Tryptophyl-Tryptophan	metab_682	-	HMDB0029094	391.169	pos	-	-	376.588	0.0867961	-	-	-	-	-	-	-	-	-	-	Organic acids and derivatives	Carboxylic acids and derivatives	Amino acids, peptides, and analogues	3.5486	3.6431	3.6711	3.122	3.2622	3.3601	3.7037	3.6277	3.682	4.0745	3.5722
pos_5904	Fesoterodine	metab_710	-	HMDB0015648	412.283	pos	-	-	234.055	0.0493334	-	-	-	286930-03-8	-	-	-	-	-	-	Benzenoids	Benzene and substituted derivatives	Diphenylmethanes	3.2973	3.0025	3.1396	3.2761	3.4737	3.7477	3.9216	4.0246	4.3057	4.0384	4.3505
pos_5950	3-Hydroxy-9-hexadecenoylcarnitine	metab_716	-	HMDB0013333	414.319	pos	-	-	179.624	0.112896	-	-	-	-	-	-	-	-	-	-	-	-	-	3.6734	3.5481	3.8625	3.7935	3.6668	3.887	3.9151	3.7258	4.1188	3.957	4.0947
pos_5961	Miconazole	metab_718	C08070	HMDB0015242	414.998	pos	-	-	23.7645	0.135039	-	-	-	22916-47-8	-	-	-	-	-	-	Benzenoids	Benzene and substituted derivatives	Benzylethers	4.4534	4.2498	4.13	4.4539	4.4719	4.3356	3.7572	3.5838	3.8885	4.1278	3.7163
pos_6016	Iophendylate	metab_722	-	HMDB0015318	417.334	pos	-	-	38.158	0.0698717	-	-	-	99-79-6	-	-	-	-	-	-	Benzenoids	Benzene and substituted derivatives	Halobenzenes	3.7221	4.2321	3.9478	4.236	3.996	4.0971	4.4256	4.9525	4.9417	4.4422	4.2843
pos_6289	3 beta,7 alpha-Dihydroxy-5-cholestenoate	metab_739	-	-	433.329	pos	-	-	45.9515	0.211747	-	-	-	-	-	-	-	-	-	-	-	-	-	4.0879	4.2143	4.1771	4.2282	4.2534	4.3319	4.5881	5.158	5.0577	4.5166	4.4256
pos_6391	PE(P-16:0e/0:0)	metab_745	-	HMDB0011152	438.296	pos	-	-	43.816	0.0520187	-	-	-	-	-	-	-	-	-	-	Lipids and lipid-like molecules	Glycerophospholipids	Glycerophosphoethanolamines	4.4769	4.641	4.6898	4.318	4.4327	4.4643	4.3719	4.357	4.405	4.2379	4.1396
pos_6426	N-Arachidonyl dopamine	metab_749	C12271	-	440.311	pos	-	-	186.175	0.183675	-	-	-	-	-	-	map04080;map04750	Neuroactive ligand-receptor interaction; Inflammatory mediator regulation of TRP channels	Environmental Information Processing;Organismal Systems	Signaling molecules and interaction;Sensory system	-	-	-	3.616	3.5507	3.6162	3.9995	3.7738	3.524	3.4746	3.463	3.5308	3.0357	3.2443
pos_6441	Tirofiban	metab_751	C07965	HMDB0014913	441.238	pos	-	-	43.258	0.113846	-	-	-	144494-65-5	-	-	-	-	-	-	Organic acids and derivatives	Carboxylic acids and derivatives	Amino acids, peptides, and analogues	4.2709	4.2606	4.4295	4.0166	4.244	4.2579	4.0413	3.9888	4.144	4.0267	4.1372
pos_6459	Mazaticol hydrochloride	metab_753	C12948	-	442.128	pos	-	-	382.164	0.165216	-	-	-	-	-	-	-	-	-	-	-	-	-	3.2064	3.3132	3.2842	2.9757	2.9868	3.0764	3.5348	3.4654	3.5201	3.6357	3.122
pos_6552	Neoporrigenin B	metab_763	-	HMDB0032680	447.308	pos	-	-	136.114	0.0318406	-	-	-	196607-74-6	-	-	-	-	-	-	Lipids and lipid-like molecules	Prenol lipids	Triterpenoids	3.6034	3.7149	4.1576	3.8102	3.9893	3.7839	4.3569	4.7484	4.7045	4.2243	4.0884
pos_6681	Bispyribac-sodium	metab_777	C18453	-	454.351	pos	-	-	209.814	0.175625	-	-	-	-	-	-	-	-	-	-	-	-	-	4.3206	3.2247	4.1967	3.4381	4.0214	4.8652	4.5137	4.4114	5.0189	4.8801	4.9293
pos_6796	N-Desmethyl vandetanib	metab_788	-	HMDB0060835	461.1	pos	-	-	26.506	0.170573	-	-	-	-	-	-	-	-	-	-	Organoheterocyclic compounds	Diazanaphthalenes	Benzodiazines	3.7579	3.9366	3.8524	3.7785	3.8251	3.7353	3.1887	3.8956	3.5811	3.5671	3.5735
pos_6926	Vitamin K1 2,3-epoxide	metab_802	C05849	HMDB0002972	467.346	pos	-	-	209.746	0.0797321	-	-	-	25486-55-9	-	-	map01100;map00130	Metabolic pathways; Ubiquinone and other terpenoid-quinone biosynthesis	Metabolism;Metabolism	Global and overview maps;Metabolism of cofactors and vitamins	Lipids and lipid-like molecules	Prenol lipids	Quinone and hydroquinone lipids	4.1645	3.045	4.0913	3.1554	3.8956	4.6048	4.3349	4.2517	4.7582	4.5965	4.6096
pos_7026	Atractyloside B	metab_814	C17859	-	473.238	pos	-	-	147.329	0.12243	-	-	-	-	-	-	-	-	-	-	-	-	-	3.5547	3.3649	3.6126	3.5056	3.7085	3.8285	3.8517	4.0976	3.969	3.8957	3.8459
pos_7145	LysoPC(P-16:0)	metab_821	-	HMDB0010407	480.342	pos	-	-	167.657	0.0660787	-	-	-	-	-	-	-	-	-	-	Lipids and lipid-like molecules	Glycerophospholipids	Glycerophosphocholines	4.9015	4.925	4.9747	4.7797	4.9597	4.9522	4.4493	4.5771	4.5675	4.6643	4.5678
pos_7194	3'-Hydroxy-T2 Toxin	metab_829	-	HMDB0036601	483.218	pos	-	-	185.694	0.197307	-	-	-	84474-35-1	-	-	-	-	-	-	Lipids and lipid-like molecules	Prenol lipids	Sesquiterpenoids	4.4327	4.6133	4.4283	4.3991	4.2963	4.2865	4.2819	4.1276	4.2019	4.3381	4.0733
pos_7390	LysoPC(16:1(9Z))	metab_841	C04230	-	494.321	pos	-	-	111.268	0.0388914	-	-	-	-	Lipids	Phospholipids	map00564;map05231	Glycerophospholipid metabolism; Choline metabolism in cancer	Metabolism;Human Diseases	Lipid metabolism;Cancer: overview	-	-	-	4.5564	4.4807	4.5328	4.3588	4.4382	4.707	4.6131	4.8267	4.9458	4.5884	4.5852
pos_7573	Sodium glycocholate	metab_854	C01921	HMDB0032596	504.265	pos	-	-	233.976	0.0766704	-	-	-	863-57-0	Steroids	24-Carbon atoms	map01100;map04979;map04976;map00120	Metabolic pathways; Cholesterol metabolism; Bile secretion; Primary bile acid biosynthesis	Metabolism;Organismal Systems;Organismal Systems;Metabolism	Global and overview maps;Digestive system;Digestive system;Lipid metabolism	Lipids and lipid-like molecules	Steroids and steroid derivatives	Bile acids, alcohols and derivatives	3.2719	3.1623	3.1498	2.984	3.0557	3.3598	3.5784	3.5765	3.8523	3.6437	3.8691
pos_7614	6'-Oxokamycin X	metab_859	-	-	506.205	pos	-	-	376.585	0.0866207	-	-	-	-	-	-	-	-	-	-	-	-	-	3.2263	3.3504	3.3754	3.0386	3.1806	3.1927	3.5311	3.3518	3.6371	3.663	3.3008
pos_7617	Thiamine triphosphate	metab_861	C03028	HMDB0001512	506.289	pos	-	-	109.58	0.135825	-	-	-	3475-65-8	-	-	map00730;map01100	Thiamine metabolism; Metabolic pathways	Metabolism;Metabolism	Metabolism of cofactors and vitamins;Global and overview maps	Organoheterocyclic compounds	Diazines	Pyrimidines and pyrimidine derivatives	4.9252	4.8847	4.9681	4.8505	4.9019	5.0368	5.0909	5.2687	5.4483	5.1968	5.1493
pos_7650	Kalbreclasine	metab_863	C08529	-	508.081	pos	-	-	23.677	0.124898	-	-	-	-	-	-	-	-	-	-	-	-	-	2.8236	2.7318	2.6956	2.6926	2.7459	2.8196	3.0378	2.8568	3.2857	3.3488	3.1904
pos_7734	Carumom sodium	metab_872	-	-	511.371	pos	-	-	233.832	0.195123	-	-	-	-	-	-	-	-	-	-	-	-	-	2.9424	2.7965	2.9065	2.8031	3.0789	3.4006	3.4855	3.91	4.165	3.7648	4.1657
pos_7748	Piperenol C	metab_874	-	HMDB0041536	512.163	pos	-	-	293.584	0.178593	-	-	-	174819-31-9	-	-	-	-	-	-	Organic acids and derivatives	Carboxylic acids and derivatives	Pentacarboxylic acids and derivatives	3.1164	2.9038	3.2205	2.7248	2.7558	2.923	3.6915	3.5062	3.4901	3.6277	3.063
pos_7801	Sulfolithocholylglycine	metab_881	C11301	HMDB0002639	514.28	pos	-	-	165.841	0.226696	-	-	-	15324-64-8	-	-	-	-	-	-	Lipids and lipid-like molecules	Steroids and steroid derivatives	Bile acids, alcohols and derivatives	3.804	3.6342	3.652	3.661	3.9095	4.2111	2.6325	3.2466	3.3603	3.3291	3.5034
pos_7819	Nb-trans-Feruloylserotonin glucoside	metab_884	-	HMDB0032761	515.21	pos	-	-	367.105	0.0572574	-	-	-	-	-	-	-	-	-	-	Organic oxygen compounds	Organooxygen compounds	Carbohydrates and carbohydrate conjugates	4.4825	4.633	4.552	4.7089	4.5728	4.5022	4.2053	4.1737	4.0129	4.1888	4.5412
pos_7906	Kolanone	metab_891	C09948	-	520.331	pos	-	-	109.555	0.0533779	-	-	-	-	-	-	-	-	-	-	-	-	-	5.948	5.9245	5.8654	5.7949	5.7577	5.789	6.0026	6.009	5.8806	6.0951	6.0745
pos_7931	4-(Cytidine 5'-diphospho)-2-C-methyl-D-erythritol	metab_893	C11435	-	522.097	pos	-	-	24.469	0.140659	-	-	-	-	-	-	map01100;map00900	Metabolic pathways; Terpenoid backbone biosynthesis	Metabolism;Metabolism	Global and overview maps;Metabolism of terpenoids and polyketides	-	-	-	2.7341	2.7305	2.8235	2.7274	2.7233	2.7688	3.3495	3.3355	3.5287	3.7506	3.7645
pos_8378	Xanthoaphin	metab_926	C01863	-	547.17	pos	-	-	354.891	0.132646	-	-	-	-	-	-	-	-	-	-	-	-	-	2.7941	2.8904	2.9852	2.5621	2.5836	2.6673	3.2159	2.9387	3.0448	3.6375	2.8006
pos_8568	Z-Gly-Pro-Leu-Gly-Pro	metab_939	C03183	-	556.264	pos	-	-	218.082	0.0775953	-	-	-	-	-	-	-	-	-	-	-	-	-	3.1614	2.861	2.9765	3.0258	2.8526	3.5734	3.0763	3.7716	3.6539	3.3141	3.6093
pos_8623	Phosphoribosyl-AMP	metab_942	C02741	HMDB0012276	560.333	pos	-	-	185.335	0.0477512	-	-	-	-	-	-	map01100;map00340;map01230	Metabolic pathways; Histidine metabolism; Biosynthesis of amino acids	Metabolism;Metabolism;Metabolism	Global and overview maps;Amino acid metabolism;Global and overview maps	Nucleosides, nucleotides, and analogues	Purine nucleotides	Purine ribonucleotides	5.5514	5.1347	5.1908	5.5975	5.57	5.3859	4.9065	4.9198	4.4103	4.3472	5.2892
pos_8725	LysoPE(24:0/0:0)	metab_952	-	HMDB0011527;LMGP02050071	566.414	pos	-	-	168.434	0.211376	-	-	-	-	-	-	-	-	-	-	Lipids and lipid-like molecules	Glycerophospholipids	Glycerophosphoethanolamines	3.8734	3.8265	3.7987	3.6837	3.8668	3.8116	3.4592	3.7054	3.5438	3.5823	3.4803
pos_8880	Rubroskyrin	metab_965	-	HMDB0030865	575.5	pos	-	-	180.64	0.194621	-	-	-	21884-47-9	-	-	-	-	-	-	Benzenoids	Anthracenes	Anthraquinones	3.8054	3.6918	3.6659	3.6031	3.8154	3.5441	3.401	3.4374	3.3978	3.4559	3.3703
pos_8940	LysoPC(22:1(13Z))	metab_967	C04230	LMGP01050141;HMDB0010399	578.415	pos	-	-	167.779	0.0512061	-	-	-	-	Lipids	Phospholipids	map00564;map05231	Glycerophospholipid metabolism; Choline metabolism in cancer	Metabolism;Human Diseases	Lipid metabolism;Cancer: overview	Lipids and lipid-like molecules	Glycerophospholipids	Glycerophosphocholines	4.417	4.4089	4.4626	4.361	4.4681	4.4598	4.2099	4.2483	4.2815	4.3354	4.3473
pos_8952	Terniflorin	metab_968	-	HMDB0037347	579.159	pos	-	-	373.091	0.0446817	-	-	-	61237-19-2	-	-	-	-	-	-	Phenylpropanoids and polyketides	Flavonoids	Flavonoid glycosides	2.8625	3.1211	2.9586	2.6595	2.6493	2.7091	3.4291	3.2345	3.3803	3.5898	2.9131
pos_8970	Formamidopyrimidine nucleoside triphosphate	metab_970	C05922	HMDB0006822	580.152	pos	-	-	283.932	0.263255	-	-	-	-	-	-	map01100;map00790	Metabolic pathways; Folate biosynthesis	Metabolism;Metabolism	Global and overview maps;Metabolism of cofactors and vitamins	Organic oxygen compounds	Organooxygen compounds	Carbohydrates and carbohydrate conjugates	3.6843	3.7559	3.5046	3.8799	3.8939	3.7186	3.5481	3.285	3.2802	3.4408	3.5471
pos_9045	Penitrem B	metab_974	C20731	-	584.331	pos	-	-	182.638	0.0695945	-	-	-	-	-	-	-	-	-	-	-	-	-	4.5874	4.2187	4.56	4.5813	4.7726	4.4989	3.9168	3.9188	3.6145	3.4769	4.2792
pos_9320	Epicatechin-(2beta-&gt	metab_986	-	-	599.501	pos	-	-	43.8785	0.12607	-	-	-	-	-	-	-	-	-	-	-	-	-	4.4097	4.4848	4.6066	4.3749	4.3615	4.5276	4.9144	5.0065	4.7694	4.6368	4.7812
pos_9453	LysoPC(24:1(15Z))	metab_995	C04230	LMGP01050144;HMDB0010406	606.446	pos	-	-	165.842	0.0880304	-	-	-	-	Lipids	Phospholipids	map00564;map05231	Glycerophospholipid metabolism; Choline metabolism in cancer	Metabolism;Human Diseases	Lipid metabolism;Cancer: overview	Lipids and lipid-like molecules	Glycerophospholipids	Glycerophosphocholines	4.5531	4.4858	4.5213	4.3671	4.5913	4.5704	3.9425	3.957	4.0085	4.2264	4.2464
pos_9771	Acteoside	metab_1012	C10501	HMDB0034843	625.233	pos	-	-	376.562	0.271251	-	-	-	61276-17-3	-	-	-	-	-	-	Phenylpropanoids and polyketides	Cinnamic acids and derivatives	Hydroxycinnamic acids and derivatives	3.0238	3.3036	3.4669	3.0311	3.0751	3.1606	3.5001	3.3852	3.4626	3.4814	3.2415
pos_9776	Quercetin 7-glucuronide 3-rhamnoside	metab_1013	-	HMDB0036264	625.515	pos	-	-	43.825	0.0805339	-	-	-	-	-	-	-	-	-	-	Phenylpropanoids and polyketides	Flavonoids	Flavonoid glycosides	4.446	4.4524	4.5799	4.5581	4.3156	4.5205	4.7048	4.816	4.5977	4.5286	4.7194
pos_10193	6''-Malonylapiin	metab_1040	-	HMDB0037601	651.53	pos	-	-	42.6425	0.19727	-	-	-	60478-75-3	-	-	-	-	-	-	Phenylpropanoids and polyketides	Flavonoids	Flavonoid glycosides	3.8785	3.897	4.0362	3.8769	3.8782	3.8991	4.1946	4.3955	4.2183	4.2157	4.0343
pos_10207	2alpha-Hydroxypyracrenic acid	metab_1042	-	HMDB0029780	652.409	pos	-	-	126.382	0.0435103	-	-	-	182682-96-8	-	-	-	-	-	-	Lipids and lipid-like molecules	Prenol lipids	Triterpenoids	5.6249	5.6266	5.5544	5.5199	5.4933	5.5176	5.6968	5.7048	5.5776	5.7537	5.7021
pos_10394	Hydroxyhomodestruxin B	metab_1054	-	HMDB0039897	662.375	pos	-	-	92.421	0.222842	-	-	-	-	-	-	-	-	-	-	Organic acids and derivatives	Peptidomimetics	Depsipeptides	3.898	3.1822	4.1131	3.9032	3.5168	4.0059	4.0905	4.411	4.4675	4.0169	4.0103
pos_10988	Spirolide B	metab_1084	-	HMDB0030492	694.462	pos	-	-	213.98	0.179891	-	-	-	170713-72-1	-	-	-	-	-	-	Organoheterocyclic compounds	Azepines	Not Available	3.3112	3.2878	3.3736	3.1733	3.221	3.4192	3.3763	3.6061	3.6417	3.5812	3.361
pos_11170	SM(d18:0/16:1(9Z))	metab_1093	C00550	HMDB0013464	703.572	pos	-	-	161.879	0.0589133	-	-	-	-	Lipids	Phospholipids	map00600;map01100;map04071;map04217	Sphingolipid metabolism; Metabolic pathways; Sphingolipid signaling pathway; Necroptosis	Metabolism;Metabolism;Environmental Information Processing;Cellular Processes	Lipid metabolism;Global and overview maps;Signal transduction;Cell growth and death	Lipids and lipid-like molecules	Sphingolipids	Phosphosphingolipids	5.2116	5.2753	5.0166	4.8872	5.048	5.2581	4.8264	4.93	4.9613	4.7893	4.5682
pos_11539	Epivoacorine	metab_1109	C09156	-	721.399	pos	-	-	215.334	0.163377	-	-	-	-	-	-	-	-	-	-	-	-	-	2.7037	2.5591	2.8462	2.4879	2.8374	2.8482	2.6954	2.8967	3.2949	3.2392	3.5461
pos_11642	Ubiquinone-8	metab_1115	C17569	-	727.57	pos	-	-	157.987	0.153293	-	-	-	-	-	-	map00130	Ubiquinone and other terpenoid-quinone biosynthesis	Metabolism	Metabolism of cofactors and vitamins	-	-	-	3.8285	3.8901	3.7961	3.6672	3.6967	3.7458	3.5006	3.6048	3.7508	3.5317	3.4647
pos_12076	PE(22:6(4Z,7Z,10Z,13Z,16Z,19Z)/15:0)	metab_1137	-	LMGP02011136;HMDB0009681	750.503	pos	-	-	125.344	0.219928	-	-	-	-	-	-	-	-	-	-	Lipids and lipid-like molecules	Glycerophospholipids	Glycerophosphoethanolamines	3.5157	3.5554	3.6916	3.7028	3.5121	3.4856	4.2195	4.4727	4.3282	4.6831	4.4503
pos_12950	TG(14:0/15:0/18:0)	metab_1187	-	HMDB0042094	794.294	pos	-	-	366.973	0.109773	-	-	-	-	-	-	-	-	-	-	Lipids and lipid-like molecules	Glycerolipids	Triradylcglycerols	4.2438	4.3748	4.309	4.5037	4.3168	4.3846	3.823	3.9202	3.5994	3.7486	4.314
pos_13314	TG(14:1(9Z)/15:0/20:4(8Z,11Z,14Z,17Z))	metab_1206	-	HMDB0047765	811.663	pos	-	-	155.88	0.0715299	-	-	-	-	-	-	-	-	-	-	Lipids and lipid-like molecules	Glycerolipids	Triradylcglycerols	4.1434	4.3856	3.9906	3.8843	4.0943	4.1032	3.6439	3.6064	3.4295	3.546	3.7719
pos_13678	Mycobactin S	metab_1232	C12216	-	828.514	pos	-	-	144.883	0.0438796	-	-	-	-	-	-	-	-	-	-	-	-	-	4.6759	4.6664	4.6267	4.6153	4.5921	4.6172	4.7116	4.7996	4.6918	4.8112	4.7678
pos_13827	PC(20:3(5Z,8Z,11Z)/20:3(5Z,8Z,11Z))	metab_1240	-	HMDB0008376	834.598	pos	-	-	126.665	0.0421717	-	-	-	-	-	-	-	-	-	-	Lipids and lipid-like molecules	Glycerophospholipids	Glycerophosphocholines	5.7503	5.7564	5.9556	5.6815	5.91	5.8604	5.6493	5.5983	5.4926	5.5889	5.525
pos_14244	PI(16:1(9Z)/18:1(11Z))	metab_1257	-	HMDB0009800	852.558	pos	-	-	180.253	0.0878827	-	-	-	-	-	-	-	-	-	-	Lipids and lipid-like molecules	Glycerophospholipids	Glycerophosphoinositols	4.0858	4.1594	3.9238	3.9915	4.0948	3.9906	3.8022	3.7224	3.6248	3.7661	3.8551
pos_14266	Hovenidulcioside A1	metab_1258	-	HMDB0041028	853.47	pos	-	-	282.063	0.0498211	-	-	-	171499-79-9	-	-	-	-	-	-	Lipids and lipid-like molecules	Prenol lipids	Terpene glycosides	4.3664	4.1922	4.6503	4.7649	4.609	4.4247	4.1498	4.348	3.9798	4.1706	4.1884
pos_17209	1,2-Dioctadecanoyl-3-(galactosyl-B-1-6-galactosyl-B-1)-glycerol	metab_1361	-	HMDB0011132	1013.3	pos	-	-	376.921	0.179137	-	-	-	-	-	-	-	-	-	-	Lipids and lipid-like molecules	Glycerolipids	Glycosylglycerols	2.9717	3.1906	3.2958	2.0961	2.4085	2.7133	3.3808	3.2668	3.5048	3.6422	2.8793
neg_133	Gamma-Butyrolactone	metab_1444	C01770	HMDB0000549	85.0289	neg	-	-	291.312	0.0792265	-	-	-	96-48-0	-	-	-	-	-	-	Organoheterocyclic compounds	Lactones	Gamma butyrolactones	4.8322	4.8603	4.9138	4.756	4.752	4.6787	5.1809	4.7932	5.0954	5.2372	4.8337
neg_423	Trifluoroacetic acid	metab_1468	-	HMDB0014118	113.024	neg	-	-	291.162	0.0701464	-	-	-	1976-05-01	-	-	-	-	-	-	Organic acids and derivatives	Carboxylic acids and derivatives	Alpha-halocarboxylic acids and derivatives	5.4651	5.5425	5.5668	5.4159	5.3934	5.3423	5.8457	5.7192	5.7578	5.8965	5.5061
neg_496	Indole	metab_1476	C00463;C19907	HMDB0000738	116.05	neg	-	-	105.745	0.115506	-	-	-	120-72-9	-	-	map01100;map00400;map00380;map04974	Metabolic pathways; Phenylalanine, tyrosine and tryptophan biosynthesis; Tryptophan metabolism; Protein digestion and absorption	Metabolism;Metabolism;Metabolism;Organismal Systems	Global and overview maps;Amino acid metabolism;Amino acid metabolism;Digestive system	Organoheterocyclic compounds	Indoles and derivatives	Indoles	5.1454	5.2992	4.9665	5.2551	4.8984	5.109	4.6496	4.8368	4.8658	4.3189	4.5888
neg_568	Hydroxypropanedioic acid	metab_1485	C02287	HMDB0035227	119.062	neg	-	-	23.3435	0.0472633	-	-	-	80-69-3	-	-	-	-	-	-	Organic acids and derivatives	Carboxylic acids and derivatives	Dicarboxylic acids and derivatives	5.2367	5.1911	5.1917	5.2631	5.041	5.0244	5.5849	5.8415	5.716	5.9166	5.7478
neg_1177	5-Butyl-2-ethyloxazole	metab_1548	-	HMDB0037862	152.107	neg	-	-	295.259	0.0759895	-	-	-	77311-04-7	-	-	-	-	-	-	Organoheterocyclic compounds	Azoles	Oxazoles	3.9501	4.0075	4.1845	3.2656	3.5901	3.6095	4.5113	4.4345	4.5516	4.5907	3.6763
neg_1644	Isovalerylsarcosine	metab_1588	-	HMDB0002087	172.097	neg	-	-	295.519	0.0753716	-	-	-	88127-29-1	-	-	-	-	-	-	Organic acids and derivatives	Carboxylic acids and derivatives	Amino acids, peptides, and analogues	5.1471	5.1601	5.4064	4.559	4.7755	4.7911	5.7855	5.6592	5.8036	5.8398	4.9508
neg_1888	Ethyl methanesulfote	metab_1618	-	-	183.04	neg	-	-	190.763	0.270934	-	-	-	-	-	-	-	-	-	-	-	-	-	3.4937	3.2334	3.1832	3.7397	3.6453	4.2436	4.0634	4.1807	4.0108	4.0748	4.0807
neg_1998	Diethyl methylsuccinate	metab_1632	-	HMDB0059814	187.107	neg	-	-	450.869	0.0885083	-	-	-	-	-	-	-	-	-	-	Lipids and lipid-like molecules	Fatty Acyls	Fatty acid esters	4.3225	4.4275	4.3927	4.0553	4.0772	4.0406	4.5166	4.4209	4.4333	4.7359	4.2523
neg_2293	L-Homocysteic acid	metab_1664	C16511	HMDB0002205	199.029	neg	-	-	23.259	0.141138	-	-	-	14857-77-3	-	-	map04080	Neuroactive ligand-receptor interaction	Environmental Information Processing	Signaling molecules and interaction	Organic acids and derivatives	Carboxylic acids and derivatives	Amino acids, peptides, and analogues	5.836	5.7559	5.7913	6.0034	5.6372	5.5821	6.0964	6.5616	6.4376	6.482	6.3642
neg_2294	beta-L-fucose	metab_1665	C20836	HMDB0059625	199.036	neg	-	-	200.18	0.0839796	-	-	-	-	-	-	-	-	-	-	Organic oxygen compounds	Organooxygen compounds	Carbohydrates and carbohydrate conjugates	4.4142	4.3179	4.4485	4.3515	4.4077	4.3166	3.3745	3.1855	3.3313	3.2761	3.723
neg_2359	Penmacric acid	metab_1671	-	HMDB0029436	201.045	neg	-	-	23.2895	0.134905	-	-	-	55297-13-7	-	-	-	-	-	-	Organic acids and derivatives	Carboxylic acids and derivatives	Amino acids, peptides, and analogues	6.9521	6.8687	6.9317	6.7733	6.7433	6.966	6.5057	6.5226	6.6472	6.366	6.5343
neg_2360	5-Hydroxymethyluracil	metab_1672	C03088	HMDB0000469	201.056	neg	-	-	225.761	0.182655	-	-	-	4433-40-3	-	-	-	-	-	-	Organoheterocyclic compounds	Diazines	Pyrimidines and pyrimidine derivatives	4.8144	4.9757	4.8742	5.0516	4.89	5.0937	5.3501	5.6176	5.6374	5.0752	4.8622
neg_2488	L-Albizziine	metab_1685	C08264	-	206.081	neg	-	-	283.517	0.0500023	-	-	-	-	-	-	-	-	-	-	-	-	-	4.7015	4.7634	4.8013	4.0145	4.3895	4.3255	5.1799	4.9982	5.0948	5.2749	4.4521
neg_2579	Mukonal	metab_1695	-	HMDB0030216	210.052	neg	-	-	105.705	0.0809795	-	-	-	20323-67-5	-	-	-	-	-	-	Organoheterocyclic compounds	Indoles and derivatives	Carbazoles	4.8459	4.9232	4.5935	5.1314	4.9372	4.6894	4.7319	4.4643	4.4026	4.2383	4.3085
neg_2659	3,5-Dichlorocatechol	metab_1703	C02933	-	213.966	neg	-	-	170.298	0.0763846	-	-	-	-	-	-	-	-	-	-	-	-	-	3.9885	3.8327	3.5604	4.3064	4.2237	4.6026	4.8304	4.6896	4.4741	4.7873	4.693
neg_2730	1-Isothiocyanato-8-(methylthio)octane	metab_1710	-	HMDB0038447	216.097	neg	-	-	383.199	0.0724189	-	-	-	4430-41-5	-	-	-	-	-	-	Organosulfur compounds	Isothiocyanates	Not Available	4.1201	4.1935	4.2827	3.789	3.8702	3.8948	4.4899	4.3124	4.4446	4.6763	4.0759
neg_2844	Methabenzthiazuron	metab_1718	C10909	-	220.063	neg	-	-	175.697	0.0644969	-	-	-	-	-	-	-	-	-	-	-	-	-	4.4379	4.3584	4.3532	4.4383	4.4149	4.5002	3.9905	4.1085	3.99	4.3429	4.2031
neg_2917	2-Amino-4-ethoxy-3-hydroxybutanoic acid	metab_1727	-	HMDB0032862	222.097	neg	-	-	374.701	0.0969237	-	-	-	98644-37-2	-	-	-	-	-	-	Organic acids and derivatives	Carboxylic acids and derivatives	Amino acids, peptides, and analogues	4.1222	4.1491	4.1644	3.821	3.8668	3.8892	4.4274	4.202	4.2677	4.5636	4.1765
neg_2918	4-[(Hydroxymethyl)nitrosoamino]-1-(3-pyridinyl)-1-butanone	metab_1728	C19563	HMDB0062382	222.096	neg	-	-	282.178	0.0254804	-	-	-	-	-	-	map05204;map00980	Chemical carcinogenesis; Metabolism of xenobiotics by cytochrome P450	Human Diseases;Metabolism	Cancer: overview;Xenobiotics biodegradation and metabolism	Organic oxygen compounds	Organooxygen compounds	Carbonyl compounds	4.158	4.0947	4.0934	3.4816	3.7599	3.8141	4.2944	4.2444	4.245	4.5052	3.98
neg_2953	Dehydrochorismic acid	metab_1730	-	HMDB0036314	223.169	neg	-	-	46.424	0.0520224	-	-	-	81757-66-6	-	-	-	-	-	-	Benzenoids	Benzene and substituted derivatives	Phenoxyacetic acid derivatives	4.8647	4.8655	5.2282	4.9752	5.3183	4.9649	5.4207	5.1906	5.4026	5.1401	5.2465
neg_3030	Nitroglycerin	metab_1736	C07455	HMDB0014865	226.003	neg	-	-	68.001	0.0641214	-	-	-	55-63-0	-	-	-	-	-	-	Organic oxygen compounds	Organic oxoanionic compounds	Organic nitrates	4.8828	4.776	4.4876	4.762	4.6317	5.109	5.4726	5.469	5.1368	5.1708	4.9102
neg_3221	Lactarofulvene	metab_1755	-	HMDB0038163	231.097	neg	-	-	296.892	0.0873832	-	-	-	18454-60-9	-	-	-	-	-	-	Lipids and lipid-like molecules	Prenol lipids	Sesquiterpenoids	4.0364	3.977	3.8934	3.8027	3.7137	3.7674	4.0012	4.1035	4.1212	4.1765	4.0536
neg_3311	(S)-Tetrahydroprotoberberine	metab_1761	C05204	-	234.133	neg	-	-	316.668	0.0917033	-	-	-	-	-	-	-	-	-	-	-	-	-	3.7976	3.7481	3.9444	3.2646	3.4841	3.4623	4.3496	4.111	4.1879	4.2975	3.5002
neg_3349	Dicrotophos	metab_1765	C18656	-	236.076	neg	-	-	371.848	0.0872669	-	-	-	-	-	-	-	-	-	-	-	-	-	4.9464	4.9712	5.023	4.5961	4.7095	4.6941	5.1898	4.9696	5.1058	5.2764	4.854
neg_3449	Pheniramine	metab_1773	-	HMDB0015557	239.163	neg	-	-	103.874	0.142859	-	-	-	86-21-5	-	-	-	-	-	-	Organoheterocyclic compounds	Pyridines and derivatives	Pheniramines	4.4317	4.6131	4.6393	4.6915	4.6156	4.3983	4.8761	4.9006	4.9114	4.9419	4.7929
neg_3463	Indole-3-carboxilic acid-O-sulphate	metab_1775	-	HMDB0060002	239.996	neg	-	-	40.7315	0.0529397	-	-	-	-	-	-	-	-	-	-	Organoheterocyclic compounds	Indoles and derivatives	Indolecarboxylic acids and derivatives	5.7335	5.7792	5.5475	5.4884	5.7316	5.7707	5.2082	5.1637	5.374	5.3688	5.27
neg_3464	Indolepyruvate	metab_1776	C00331	HMDB0060484	240.018	neg	-	-	76.268	0.109165	-	-	-	35656-49-6	-	-	map01100;map00380	Metabolic pathways; Tryptophan metabolism	Metabolism;Metabolism	Global and overview maps;Amino acid metabolism	Organoheterocyclic compounds	Indoles and derivatives	Indolyl carboxylic acids and derivatives	4.5006	4.0843	3.9527	4.9025	4.7613	5.1766	5.5254	5.4846	5.1397	5.2667	4.9023
neg_3546	Maculine	metab_1787	C10714	-	242.04	neg	-	-	25.635	0.117925	-	-	-	-	-	-	-	-	-	-	-	-	-	6.1354	5.9142	5.9602	5.7278	6.0968	6.1559	4.31	4.9895	5.5306	4.8651	5.3946
neg_3661	Fluorocitric acid	metab_1798	-	HMDB0031255	245.077	neg	-	-	25.161	0.132818	-	-	-	357-89-1	-	-	-	-	-	-	Organic acids and derivatives	Carboxylic acids and derivatives	Tricarboxylic acids and derivatives	4.7785	5.4834	5.6393	4.9559	4.9112	4.8208	5.9801	5.8129	5.8953	6.6669	6.8573
neg_3664	Nigellicine	metab_1800	-	HMDB0030269	245.091	neg	-	-	284.708	0.0795528	-	-	-	98063-20-8	-	-	-	-	-	-	Organoheterocyclic compounds	Benzopyrazoles	Indazoles	4.0203	4.0232	4.1583	3.3185	3.7133	3.7009	4.4242	4.3177	4.2211	4.6138	3.7624
neg_3728	Pyridoxamine 5'-phosphate	metab_1804	C00647	HMDB0001555	247.168	neg	-	-	45.054	0.0816902	-	-	-	529-96-4	-	-	map01100;map00750;map04977	Metabolic pathways; Vitamin B6 metabolism; Vitamin digestion and absorption	Metabolism;Metabolism;Organismal Systems	Global and overview maps;Metabolism of cofactors and vitamins;Digestive system	Organoheterocyclic compounds	Pyridines and derivatives	Pyridoxamines	3.986	3.8331	4.1899	3.9446	4.2685	4.0516	4.7023	4.3821	4.7345	4.845	4.7938
neg_3748	Cysteinyl-Gamma-glutamate	metab_1805	-	HMDB0028789	248.08	neg	-	-	234.482	0.176706	-	-	-	-	-	-	-	-	-	-	Organic acids and derivatives	Carboxylic acids and derivatives	Amino acids, peptides, and analogues	3.3147	3.1736	3.5348	3.2811	3.5886	3.6397	3.4844	3.9197	4.0661	4.2638	4.2623
neg_3758	Pyridoxine 5'-phosphate	metab_1806	C00627	HMDB0001319	248.149	neg	-	-	295.182	0.0855513	-	-	-	447-05-2	-	-	map01100;map00750	Metabolic pathways; Vitamin B6 metabolism	Metabolism;Metabolism	Global and overview maps;Metabolism of cofactors and vitamins	Organoheterocyclic compounds	Pyridines and derivatives	Pyridoxines	4.5485	4.5878	4.805	3.9225	4.1609	4.2005	5.1488	5.0659	5.1887	5.2124	4.3437
neg_3775	4-(Methylnitrosamino)-1-(3-pyridyl)-1-butanol	metab_1808	C19574	HMDB0041809	249.148	neg	-	-	45.7025	0.102825	-	-	-	76014-81-8	-	-	map05204;map00980	Chemical carcinogenesis; Metabolism of xenobiotics by cytochrome P450	Human Diseases;Metabolism	Cancer: overview;Xenobiotics biodegradation and metabolism	Organoheterocyclic compounds	Pyridines and derivatives	Not Available	4.6442	4.5837	5.2682	4.6902	4.6432	4.5787	4.9973	5.1145	5.16	5.2125	5.0761
neg_3846	2-(4-Hydroxybenzyl)isoindole-1,3-dione	metab_1813	C14264	-	252.071	neg	-	-	23.747	0.156542	-	-	-	-	-	-	-	-	-	-	-	-	-	5.7127	5.4367	5.4615	5.6628	5.7514	5.6429	4.7265	4.4542	4.9764	5.1309	4.8821
neg_3887	(+)-Setoclavine	metab_1817	-	HMDB0033428	253.142	neg	-	-	263.147	0.263643	-	-	-	519-12-0	-	-	-	-	-	-	Alkaloids and derivatives	Ergoline and derivatives	Clavines and derivatives	3.4687	3.3446	3.491	3.443	3.4826	3.4766	3.7141	3.616	3.8168	4.0227	3.5955
neg_4362	Allopurinol riboside	metab_1851	-	HMDB0000481	267.231	neg	-	-	43.714	0.099255	-	-	-	16220-07-8	-	-	-	-	-	-	Nucleosides, nucleotides, and analogues	Pyrazolo[3,4-d]pyrimidine glycosides	Not Available	5.3405	5.4256	5.5605	5.3941	5.4216	5.254	5.2346	4.9837	5.0633	5.0841	5.3643
neg_4584	Dihydroferulic acid 4-sulfate	metab_1864	-	HMDB0041724	275.03	neg	-	-	282.603	0.225262	-	-	-	-	-	-	-	-	-	-	Organic acids and derivatives	Organic sulfuric acids and derivatives	Arylsulfates	3.9132	3.8414	3.9333	3.9426	4.0801	4.1432	3.3843	3.6387	3.58	3.6925	4.0071
neg_4673	2-(Methylthio)-3H-phenoxazin-3-one	metab_1875	-	HMDB0035996	277.996	neg	-	-	44.592	0.0793574	-	-	-	115695-20-0	-	-	-	-	-	-	Organoheterocyclic compounds	Benzoxazines	Phenoxazines	3.9638	3.6403	3.7732	4.3744	4.3107	4.7313	4.8037	4.6986	4.5605	4.4533	4.4281
neg_4688	Asparaginyl-Phenylalanine	metab_1876	-	HMDB0028738	278.123	neg	-	-	316.722	0.107875	-	-	-	-	-	-	-	-	-	-	Organic acids and derivatives	Carboxylic acids and derivatives	Amino acids, peptides, and analogues	4.8933	4.8563	5.0411	4.3446	4.5316	4.5102	5.5733	5.3136	5.4186	5.5073	4.5743
neg_4723	Dehydroanonaine	metab_1879	-	HMDB0030350	279.121	neg	-	-	104.481	0.197043	-	-	-	41679-82-7	-	-	-	-	-	-	Alkaloids and derivatives	Aporphines	Not Available	4.3587	4.4083	5.2123	4.2437	4.3063	4.3644	5.1215	4.9034	5.2318	5.7229	5.5932
neg_4852	Prenyl cis-caffeate	metab_1890	C10487	HMDB0041140	283.08	neg	-	-	210.909	0.0576915	-	-	-	118971-61-2	-	-	-	-	-	-	Phenylpropanoids and polyketides	Cinnamic acids and derivatives	Hydroxycinnamic acids and derivatives	3.6804	3.868	4.0102	3.7306	3.4468	3.6264	4.4521	4.8828	4.4193	4.239	4.6217
neg_4875	5-Amino-4-chloro-2-(5-hydroxymuconoyl)-3(2H)-pyridazinone	metab_1893	C05155	-	284.018	neg	-	-	206.27	0.158106	-	-	-	-	-	-	-	-	-	-	-	-	-	3.2253	3.2136	3.1567	3.6035	3.4089	3.7848	3.913	3.9812	3.7119	3.894	3.7848
neg_5080	Cysteinyl-Glutamate	metab_1906	-	HMDB0028774	289.071	neg	-	-	182.069	0.160205	-	-	-	-	-	-	-	-	-	-	Organic acids and derivatives	Carboxylic acids and derivatives	Amino acids, peptides, and analogues	3.7886	3.8129	3.9368	3.7616	3.7486	3.6962	3.9352	3.9276	4.1854	4.2071	4.0022
neg_5201	4-[(2,4-Dihydroxyphenyl)azo]benzenesulfonic acid	metab_1914	-	HMDB0037835	293.031	neg	-	-	76.047	0.0266036	-	-	-	2050-34-2	-	-	-	-	-	-	Organoheterocyclic compounds	Azobenzenes	Not Available	4.6285	4.5577	4.5912	4.4836	4.4859	4.5199	4.0251	3.8474	4.3047	4.5969	4.0895
neg_5213	Arginyl-Cysteine	metab_1917	-	HMDB0028706	293.141	neg	-	-	295.151	0.0943204	-	-	-	-	-	-	-	-	-	-	Organic acids and derivatives	Carboxylic acids and derivatives	Amino acids, peptides, and analogues	4.7266	4.7652	4.9992	4.122	4.2838	4.3771	5.3828	5.2868	5.4168	5.4473	4.5222
neg_5272	4-Carboxynevirapine	metab_1924	-	HMDB0060759	295.08	neg	-	-	200.325	0.0517901	-	-	-	-	-	-	-	-	-	-	Lipids and lipid-like molecules	Steroids and steroid derivatives	Estrane steroids	3.4991	3.4202	3.567	3.4816	3.3411	3.405	3.6009	3.9224	3.8685	4.1357	4.1088
neg_5494	2-Hydroxy-4-(4-methoxyphenyl)-1H-phenalen-1-one	metab_1941	-	HMDB0041462	301.09	neg	-	-	139.19	0.0354615	-	-	-	159853-36-8	-	-	-	-	-	-	Benzenoids	Naphthalenes	Phenylnaphthalenes	4.1206	4.1852	3.6312	3.9606	3.9611	3.6407	3.6546	3.3854	3.6634	3.7481	3.4277
neg_5579	Balfourodinium	metab_1947	C10648	-	303.157	neg	-	-	221.901	0.122733	-	-	-	-	-	-	-	-	-	-	-	-	-	3.2854	3.3691	3.3919	3.4827	3.2207	3.2688	4.4161	4.5696	4.548	4.6902	4.5512
neg_5645	Histidinyl-Hydroxyproline	metab_1952	-	HMDB0028886	305.068	neg	-	-	42.42	0.0761312	-	-	-	-	-	-	-	-	-	-	Organic acids and derivatives	Carboxylic acids and derivatives	Amino acids, peptides, and analogues	4.8568	4.8151	4.8592	4.8765	4.912	4.6917	5.4231	5.0659	5.4707	5.1818	5.1512
neg_5711	Phenylbutazone	metab_1958	C07440	HMDB0014950	307.148	neg	-	-	436.322	0.0506057	-	-	-	50-33-9	-	-	-	-	-	-	Benzenoids	Benzene and substituted derivatives	Not Available	4.6549	4.7124	4.746	4.3023	4.33	4.3707	4.8428	4.7333	4.7642	5.0545	4.5902
neg_5860	Caftaric acid	metab_1971	-	HMDB0013680	311.22	neg	-	-	178.002	0.0852148	-	-	-	67879-58-7	-	-	-	-	-	-	Phenylpropanoids and polyketides	Cinnamic acids and derivatives	Hydroxycinnamic acids and derivatives	5.0578	4.8475	5.2416	5.094	5.3084	5.238	4.7699	4.6116	5.0494	4.7292	4.758
neg_5933	7,8-Dihydropteroic acid	metab_1975	C00921	HMDB0001412	313.11	neg	-	-	356.325	0.0506263	-	-	-	2134-76-1	-	-	map01100;map00790	Metabolic pathways; Folate biosynthesis	Metabolism;Metabolism	Global and overview maps;Metabolism of cofactors and vitamins	Organoheterocyclic compounds	Pteridines and derivatives	Pterins and derivatives	4.7975	4.7794	4.8121	4.8398	4.9368	5.0309	4.461	4.4068	4.5063	4.586	4.9655
neg_5944	Beta-D-Glucopyranuronic acid	metab_1977	C08350	HMDB0010314	313.235	neg	-	-	68.358	0.0401313	-	-	-	29315-53-5	-	-	-	-	-	-	Organic oxygen compounds	Organooxygen compounds	Carbohydrates and carbohydrate conjugates	5.3207	5.4022	5.5154	5.2645	5.4827	5.1789	4.8472	4.6194	4.8769	4.3847	4.6342
neg_5993	Glutathione episulfonium ion	metab_1982	C14874	HMDB0060479	315.078	neg	-	-	377.338	0.0853838	-	-	-	-	-	-	map05204;map00980	Chemical carcinogenesis; Metabolism of xenobiotics by cytochrome P450	Human Diseases;Metabolism	Cancer: overview;Xenobiotics biodegradation and metabolism	Organic acids and derivatives	Carboxylic acids and derivatives	Amino acids, peptides, and analogues	4.3256	4.1706	4.1801	4.4206	4.3974	4.3745	3.955	3.9939	3.9318	4.0623	4.3076
neg_5995	Melilotocarpan D	metab_1983	-	HMDB0033692;LMPK12070084	315.088	neg	-	-	66.945	0.0340602	-	-	-	83013-81-4	-	-	-	-	-	-	Phenylpropanoids and polyketides	Isoflavonoids	Furanoisoflavonoids	4.1891	3.9861	3.9225	4.0272	3.8162	3.8695	4.4978	4.6552	4.7824	4.7772	4.5433
neg_6029	1,3,5-Trihydroxy-10-methylacridone	metab_1985	-	HMDB0041468	316.093	neg	-	-	271.329	0.059442	-	-	-	-	-	-	-	-	-	-	Organoheterocyclic compounds	Quinolines and derivatives	Benzoquinolines	3.7812	3.7483	3.8441	3.2528	3.5331	3.4616	4.0789	3.8716	3.9712	4.2005	3.6153
neg_6032	N-(1-Deoxy-1-fructosyl)histidine	metab_1986	-	HMDB0037839	316.114	neg	-	-	368.11	0.0547706	-	-	-	25020-13-7	-	-	-	-	-	-	Lipids and lipid-like molecules	Prenol lipids	Sesquiterpenoids	5.0096	4.9788	5.0112	5.1279	5.0781	4.9568	4.8576	4.7059	4.6509	4.8665	4.9905
neg_6054	Brompheniramine	metab_1988	C06857	HMDB0001941	317.07	neg	-	-	26.26	0.155075	-	-	-	86-22-6	-	-	-	-	-	-	Organoheterocyclic compounds	Pyridines and derivatives	Pheniramines	3.7671	3.6938	3.5374	3.7329	3.7894	3.6138	4.2681	3.9758	4.3831	4.6748	4.5336
neg_6322	Niclosamide	metab_2005	-	HMDB0015679	326.122	neg	-	-	283.517	0.0509262	-	-	-	50-65-7	-	-	-	-	-	-	Benzenoids	Benzene and substituted derivatives	Anilides	5.378	5.4142	5.5138	4.6303	4.9925	4.9582	5.9133	5.7179	5.8173	6.0272	5.0961
neg_6433	Inosine 2',3'-cyclic phosphate	metab_2013	-	-	329.187	neg	-	-	155.924	0.168018	-	-	-	-	-	-	-	-	-	-	-	-	-	3.7714	4.0678	4.1003	3.97	3.7751	3.9187	3.7521	3.9972	3.5089	3.4388	3.4601
neg_6434	Aluminum acetoacetate	metab_2014	C17688	-	329.23	neg	-	-	105.37	0.0572923	-	-	-	-	-	-	-	-	-	-	-	-	-	4.8825	5.0859	4.8329	4.6439	4.8198	4.7552	4.8079	4.3483	4.426	4.6496	4.7208
neg_6529	2-Methyl-1,4-naphthalenediol bis(dihydrogen phosphate)	metab_2021	-	HMDB0032721	333.004	neg	-	-	32.5145	0.167519	-	-	-	84-98-0	-	-	-	-	-	-	Benzenoids	Naphthalenes	Not Available	4.3628	4.3066	4.7575	4.4481	4.424	4.2541	3.9729	3.6954	4.2222	4.3303	4.0646
neg_6532	Nicotinamide ribotide	metab_2022	C00455	HMDB0000229	333.045	neg	-	-	23.899	0.111368	-	-	-	1094-61-7	-	-	map01100;map00760	Metabolic pathways; Nicotinate and nicotinamide metabolism	Metabolism;Metabolism	Global and overview maps;Metabolism of cofactors and vitamins	Nucleosides, nucleotides, and analogues	Pyridine nucleotides	Nicotinamide nucleotides	5.3903	5.2338	5.2407	5.324	5.2714	5.1631	4.7767	4.5486	4.8241	5.2266	4.9084
neg_6629	6-oxo-famciclovir	metab_2035	-	HMDB0061100	336.138	neg	-	-	383.204	0.0677816	-	-	-	-	-	-	-	-	-	-	Organoheterocyclic compounds	Imidazopyrimidines	Purines and purine derivatives	4.5949	4.6936	4.7461	4.2529	4.3312	4.3685	4.999	4.8063	4.9472	5.1934	4.5333
neg_6661	Ovalitenone	metab_2040	-	LMPK12120372;HMDB0030619	337.074	neg	-	-	332.447	0.123975	-	-	-	64280-22-4	-	-	-	-	-	-	Phenylpropanoids and polyketides	Linear 1,3-diarylpropanoids	Chalcones and dihydrochalcones	3.5741	3.7234	3.4812	3.6374	3.4024	3.3232	3.6357	3.8959	3.7796	3.9489	3.7027
neg_6669	Nicotine glucuronide	metab_2041	-	HMDB0001272	337.137	neg	-	-	191.382	0.0249505	-	-	-	152306-59-7	-	-	-	-	-	-	Organic oxygen compounds	Organooxygen compounds	Carbohydrates and carbohydrate conjugates	3.2628	3.2541	3.2303	2.9676	3.0488	3.0084	3.6356	3.3496	3.4404	3.7054	3.1886
neg_6731	Dihydro-O-methylsterigmatocystin	metab_2046	C03944	HMDB0030591	339.088	neg	-	-	36.9	0.225944	-	-	-	21793-91-9	-	-	map01100	Metabolic pathways	Metabolism	Global and overview maps	Organoheterocyclic compounds	Benzopyrans	1-benzopyrans	3.8893	4.4717	3.9547	4.084	3.945	4.0237	4.6629	4.5026	4.8146	4.7442	4.7577
neg_6820	(±)-Sphaerosin	metab_2054	-	HMDB0038128	342.136	neg	-	-	371.834	0.100713	-	-	-	52305-06-3	-	-	-	-	-	-	Phenylpropanoids and polyketides	Isoflavonoids	O-methylated isoflavonoids	3.8416	3.8201	3.7857	3.883	3.9257	3.9299	3.4744	3.5451	3.5873	3.6152	3.9054
neg_6838	Eupatilin	metab_2055	C10040	LMPK12111228;HMDB0029469	343.084	neg	-	-	95.501	0.0225595	-	-	-	22368-21-4	-	-	-	-	-	-	Phenylpropanoids and polyketides	Flavonoids	O-methylated flavonoids	5.7887	5.4893	5.7298	5.5628	5.3268	5.5986	6.0213	5.8367	6.1273	6.478	6.2508
neg_6846	Tyrosyl-Tyrosine	metab_2057	-	HMDB0029117	343.137	neg	-	-	170.652	0.112513	-	-	-	-	-	-	-	-	-	-	Organic acids and derivatives	Carboxylic acids and derivatives	Amino acids, peptides, and analogues	3.0297	3.0895	3.139	3.1962	3.1446	3.3377	3.3734	3.3326	3.351	3.9622	3.7692
neg_6851	3-O-Galloyl-1,4-galactarolactone	metab_2058	-	HMDB0037201	343.225	neg	-	-	47.013	0.0566294	-	-	-	-	-	-	-	-	-	-	Benzenoids	Benzene and substituted derivatives	Benzoic acids and derivatives	5.7072	5.5169	5.7178	5.8763	5.9686	5.5881	5.5306	5.4346	5.2343	4.9276	5.2097
neg_6997	Dicloralurea	metab_2070	-	HMDB0031815	350.847	neg	-	-	34.8965	0.114923	-	-	-	116-52-9	-	-	-	-	-	-	Organic acids and derivatives	Organic carbonic acids and derivatives	Ureas	3.776	3.4716	3.6744	3.2082	3.2695	4.0095	3.8123	4.8878	4.8536	4.2477	3.4067
neg_7006	3-Hydroxy-9-(4-hydroxyphenyl)-1H,3H-naphtho[1,8-cd]pyran-1-one	metab_2073	-	HMDB0039404	351.094	neg	-	-	24.87	0.0810626	-	-	-	-	-	-	-	-	-	-	Benzenoids	Naphthalenes	Phenylnaphthalenes	4.6697	4.8466	4.274	4.5005	4.4411	4.6348	4.2312	4.1973	4.1449	4.4367	4.3985
neg_7128	xi-3-Hydroxy-5-phenylpentanoic acid O-beta-D-Glucopyranoside	metab_2084	-	HMDB0031695	355.137	neg	-	-	162.226	0.17764	-	-	-	-	-	-	-	-	-	-	Lipids and lipid-like molecules	Fatty Acyls	Fatty acyl glycosides	3.2483	3.1601	3.5125	3.2922	3.2795	3.3177	4.3608	4.4495	4.6388	4.9741	4.8061
neg_7177	5,8-Dihydroxy-3-(4-hydroxybenzyl)-7-methoxy-4-chromanone 8-acetate	metab_2087	-	HMDB0037252	357.098	neg	-	-	93.724	0.0469406	-	-	-	99877-75-5	-	-	-	-	-	-	Phenylpropanoids and polyketides	Homoisoflavonoids	Homoisoflavans	6.1541	6.1523	6.1401	6.1269	5.7824	6.0148	5.2537	5.0005	5.2905	5.5514	5.4433
neg_7188	N1-(5-Phospho-a-D-ribosyl)-5,6-dimethylbenzimidazole	metab_2088	C04778	HMDB0003882	357.277	neg	-	-	39.358	0.0843446	-	-	-	-	-	-	map01100;map00860	Metabolic pathways; Porphyrin and chlorophyll metabolism	Metabolism;Metabolism	Global and overview maps;Metabolism of cofactors and vitamins	Nucleosides, nucleotides, and analogues	Benzimidazole ribonucleosides and ribonucleotides	Not Available	5.0175	4.9037	5.3669	5.0452	5.1674	5.1262	5.4299	5.4593	5.5234	5.3427	5.3063
neg_7232	Grevilline A	metab_2092	-	HMDB0029535	359.041	neg	-	-	377.248	0.144157	-	-	-	41744-32-5	-	-	-	-	-	-	Organoheterocyclic compounds	Pyrans	Pyranones and derivatives	4.0295	3.8721	3.9016	4.1955	4.1636	4.1184	3.5712	3.6588	3.58	3.6168	4.0275
neg_7244	7-Methylrosmanol	metab_2094	-	HMDB0035813	359.186	neg	-	-	141.38	0.0565912	-	-	-	113085-62-4	-	-	-	-	-	-	Lipids and lipid-like molecules	Prenol lipids	Terpene lactones	4.9138	4.713	5.8732	4.6063	5.484	5.2548	4.0872	4.2166	4.1872	4.0467	4.3398
neg_7245	Tryptophyl-Arginine	metab_2095	-	HMDB0029077	359.186	neg	-	-	160.91	0.0417152	-	-	-	-	-	-	-	-	-	-	Organic acids and derivatives	Carboxylic acids and derivatives	Amino acids, peptides, and analogues	4.5553	4.3211	5.3807	4.356	5.1791	4.8274	3.7674	3.8864	3.833	3.7617	3.9584
neg_7259	Chloramphenicol	metab_2096	C00918	HMDB0014589	360.082	neg	-	-	271.379	0.0247574	-	-	-	56-75-7	Antibiotics	Others	-	-	-	-	Benzenoids	Benzene and substituted derivatives	Nitrobenzenes	4.4758	4.4746	4.5549	3.8581	4.2204	4.1277	4.8211	4.6265	4.7062	4.943	4.3392
neg_7364	Fludarabine	metab_2103	C21550	HMDB0015206	364.056	neg	-	-	339.408	0.150125	-	-	-	75607-67-9	-	-	-	-	-	-	Nucleosides, nucleotides, and analogues	Purine nucleotides	Purine ribonucleotides	4.2629	4.3287	4.343	4.3879	4.4297	4.3873	4.1541	4.1152	4.0405	4.1227	4.2513
neg_7393	Phosphoribosyl formamidocarboxamide	metab_2106	C04734	HMDB0001439	365.064	neg	-	-	95.42	0.0808585	-	-	-	-	-	-	map01100;map00230	Metabolic pathways; Purine metabolism	Metabolism;Metabolism	Global and overview maps;Nucleotide metabolism	Nucleosides, nucleotides, and analogues	Imidazole ribonucleosides and ribonucleotides	1-ribosyl-imidazolecarboxamides	4.2966	4.0537	4.1903	4.2761	4.1701	4.0924	4.6053	4.2983	4.4038	4.9075	4.5716
neg_7457	3-O-Caffeoyl-1-O-methylquinic acid	metab_2112	-	HMDB0039959	367.102	neg	-	-	257.019	0.173794	-	-	-	-	-	-	-	-	-	-	Organic oxygen compounds	Organooxygen compounds	Alcohols and polyols	4.4829	4.5493	4.5919	4.4149	4.5655	4.383	5.0324	4.8198	4.8258	5.0814	4.5102
neg_7458	Flusilazole	metab_2113	C18733	HMDB0039815	367.101	neg	-	-	378.182	0.27874	-	-	-	85509-19-9	-	-	-	-	-	-	Benzenoids	Benzene and substituted derivatives	Halobenzenes	4.104	4.1787	4.285	4.09	4.0974	4.2254	4.6854	4.3237	4.3455	4.7479	4.1055
neg_7563	Deacetyldiltiazem	metab_2119	-	HMDB0002873	371.146	neg	-	-	37.5445	0.159941	-	-	-	42399-40-6	-	-	-	-	-	-	Organoheterocyclic compounds	Benzothiazepines	Not Available	3.81	3.439	3.7827	3.529	3.8427	3.7509	3.851	3.8301	3.978	4.0794	4.0887
neg_7623	N'-Hydroxysaxitoxin	metab_2122	-	HMDB0033664	374.139	neg	-	-	295.961	0.130233	-	-	-	153856-77-0	-	-	-	-	-	-	Phenylpropanoids and polyketides	Saxitoxins, gonyautoxins, and derivatives	Not Available	4.0963	4.1004	4.3307	3.5262	3.7452	3.8252	4.4163	4.3992	4.5135	4.5689	3.9006
neg_7656	Petromyzonol	metab_2125	C16258	LMST04010301	375.286	neg	-	-	46.511	0.193992	-	-	-	-	-	-	-	-	-	-	-	-	-	4.7092	4.7177	4.9352	4.9549	4.984	4.5532	4.241	4.6572	4.353	4.3528	4.6774
neg_7689	Endrin	metab_2127	C18124	HMDB0031211	376.862	neg	-	-	57.03	0.0384911	-	-	-	72-20-8	-	-	-	-	-	-	Lipids and lipid-like molecules	Prenol lipids	Monoterpenoids	4.3359	4.3328	4.3623	4.2977	4.331	4.3214	4.1154	4.096	4.1368	4.1661	4.3078
neg_7707	[12]-Gingerol	metab_2130	-	HMDB0036356	377.266	neg	-	-	101.344	0.194117	-	-	-	104264-55-3	-	-	-	-	-	-	Benzenoids	Phenols	Methoxyphenols	5.5113	5.3181	5.6597	5.492	5.7678	5.5553	4.4111	4.3556	4.685	4.4658	4.4567
neg_7765	4-Methoxybenzyl O-(2-sulfoglucoside)	metab_2135	-	HMDB0034754	379.354	neg	-	-	38.337	0.0929449	-	-	-	-	-	-	-	-	-	-	Organic oxygen compounds	Organooxygen compounds	Carbohydrates and carbohydrate conjugates	4.0912	4.0135	4.1199	3.9303	3.99	4.0301	3.5414	3.4523	3.6957	3.8598	3.8812
neg_7959	Eszopiclone	metab_2151	-	HMDB0014546	387.107	neg	-	-	170.596	0.221501	-	-	-	138729-47-2	-	-	-	-	-	-	Organoheterocyclic compounds	Pyrrolopyrazines	Cyclopyrrolones	2.838	2.8072	2.8926	2.6921	2.8291	2.8243	2.9293	3.1637	3.2921	3.4069	3.6558
neg_8017	Nutriacholic acid	metab_2157	-	HMDB0000467	389.266	neg	-	-	111.358	0.0595733	-	-	-	4651-67-6	-	-	-	-	-	-	Lipids and lipid-like molecules	Steroids and steroid derivatives	Bile acids, alcohols and derivatives	4.8806	4.7006	5.042	5.0078	5.2388	5.3948	5.22	5.5598	5.39	5.4612	5.3726
neg_8041	Proacaciberin	metab_2159	C08337	-	390.147	neg	-	-	286.717	0.11099	-	-	-	-	-	-	-	-	-	-	-	-	-	3.5149	3.3796	3.4278	3.047	3.1167	3.2055	3.4034	3.5283	3.5344	3.7744	3.376
neg_8074	Trospium	metab_2161	-	HMDB0014354	391.222	neg	-	-	44.5775	0.1209	-	-	-	47608-32-2	-	-	-	-	-	-	Benzenoids	Benzene and substituted derivatives	Diphenylmethanes	5.6224	5.6064	5.8139	5.4887	5.6376	5.5627	5.4913	5.3143	5.289	5.4053	5.5663
neg_8081	Caryoptosidic acid	metab_2163	-	HMDB0034249	391.354	neg	-	-	38.572	0.0831032	-	-	-	220271-92-1	-	-	-	-	-	-	Lipids and lipid-like molecules	Prenol lipids	Terpene glycosides	4.3517	4.1985	4.3942	4.1812	4.3441	4.3138	3.9005	3.7232	4.054	4.2072	4.2454
neg_8128	Stanolone benzoate	metab_2169	C14259	-	393.261	neg	-	-	194.849	0.0318675	-	-	-	-	-	-	-	-	-	-	-	-	-	2.9061	3.3511	3.1814	3.3583	3.2107	3.7902	4.0155	3.7693	3.5566	4.0127	3.4342
neg_8260	Zuclopenthixol	metab_2177	-	HMDB0015561	399.128	neg	-	-	105.602	0.099553	-	-	-	53772-83-1	-	-	-	-	-	-	Organoheterocyclic compounds	Benzothiopyrans	1-benzothiopyrans	4.6838	4.8975	4.2872	5.112	4.5934	4.5367	4.2271	4.2141	4.1333	3.5197	3.6951
neg_8305	Benzyl beta-primeveroside	metab_2182	-	HMDB0041190	401.159	neg	-	-	41.96	0.0708611	-	-	-	130622-31-0	-	-	-	-	-	-	Organic oxygen compounds	Organooxygen compounds	Carbohydrates and carbohydrate conjugates	4.7972	4.6145	4.8295	4.7894	4.7997	4.964	4.3641	4.6479	4.6351	4.2455	4.377
neg_8353	zopiclone-N-oxide	metab_2185	-	-	403.099	neg	-	-	23.114	0.206824	-	-	-	-	-	-	-	-	-	-	-	-	-	3.9707	3.7945	4.0052	4.1563	3.9344	3.9779	3.3458	3.3916	3.5852	3.4949	3.3733
neg_8366	Estradiol-17-phenylpropiote	metab_2187	-	-	403.245	neg	-	-	104.462	0.102095	-	-	-	-	-	-	-	-	-	-	-	-	-	3.8933	3.7868	4.0912	3.9692	4.1976	4.3465	4.2391	4.4904	4.5626	4.4981	4.6185
neg_8477	Wybutoxine	metab_2199	-	HMDB0039126	407.127	neg	-	-	24.562	0.131582	-	-	-	36238-44-5	-	-	-	-	-	-	Organic acids and derivatives	Carboxylic acids and derivatives	Amino acids, peptides, and analogues	3.5437	3.4879	3.537	3.5856	3.7766	3.7119	4.3098	3.8718	4.0018	4.1751	4.3558
neg_8553	3-(4-Hydroxybenzoyl)epicatechin	metab_2205	-	HMDB0039327	409.364	neg	-	-	43.87	0.161313	-	-	-	108907-45-5	-	-	-	-	-	-	Phenylpropanoids and polyketides	Flavonoids	Flavans	4.369	4.5963	4.4319	4.5493	4.5485	4.3604	3.6879	3.8521	4.0719	4.0273	4.2967
neg_8594	Imazosulfuron	metab_2209	C18443	-	411.037	neg	-	-	105.399	0.0287768	-	-	-	-	-	-	-	-	-	-	-	-	-	4.0652	4.1988	3.8464	4.2197	3.9727	3.9417	3.8153	3.7496	3.7977	3.4932	3.5441
neg_8779	Flurbiprofen glucuronide	metab_2227	-	HMDB0060918	419.13	neg	-	-	195.555	0.145813	-	-	-	-	-	-	-	-	-	-	Organic oxygen compounds	Organooxygen compounds	Carbohydrates and carbohydrate conjugates	3.4704	3.565	3.4205	3.3369	3.5572	3.6666	3.7218	3.6901	3.779	3.6137	3.8754
neg_8835	Ginkgolide C	metab_2231	C07603	HMDB0036860;LMPR0104540003	421.11	neg	-	-	22.9995	0.0582857	-	-	-	15291-76-6	-	-	-	-	-	-	Lipids and lipid-like molecules	Prenol lipids	Terpene lactones	3.2934	3.0344	3.2599	3.2622	3.309	3.3649	4.6511	4.1273	4.7923	4.8873	4.6631
neg_8836	Rumexoside	metab_2232	-	HMDB0036398	421.115	neg	-	-	291.667	0.0645959	-	-	-	-	-	-	-	-	-	-	Organic oxygen compounds	Organooxygen compounds	Carbohydrates and carbohydrate conjugates	3.6589	3.755	3.7446	3.645	3.6931	3.5519	4.1352	3.9181	4.032	4.0715	3.7111
neg_8949	(Z)-Narceine imide	metab_2237	-	HMDB0030378	425.177	neg	-	-	138.385	0.0463276	-	-	-	55968-77-9	-	-	-	-	-	-	Organoheterocyclic compounds	Isoindoles and derivatives	Isoindolines	3.1404	2.9821	3.1486	3.0792	3.1476	3.1114	3.8433	4.1042	4.3627	4.144	4.4514
neg_8960	(-)-Epiafzelechin 3-gallate	metab_2238	-	HMDB0038846	425.359	neg	-	-	77.286	0.0233468	-	-	-	108907-43-3	-	-	-	-	-	-	Phenylpropanoids and polyketides	Flavonoids	Flavans	3.9629	3.8981	3.9855	4.0273	4.0919	3.8937	4.419	4.4322	4.5052	4.5812	4.5527
neg_9006	4,4'-Diapolycopenedial	metab_2241	C19798	-	427.281	neg	-	-	68.0345	0.0775293	-	-	-	-	-	-	-	-	-	-	-	-	-	3.8639	3.8134	3.9146	3.8726	3.9788	4.0875	4.4463	4.5839	4.5968	4.4493	4.656
neg_9037	Iodofenphos	metab_2242	C19002	-	429.01	neg	-	-	22.486	0.240559	-	-	-	-	-	-	-	-	-	-	-	-	-	4.638	4.5633	4.1489	4.6317	4.4702	4.5074	4.0054	3.4796	3.8579	4.3124	3.8389
neg_9051	MG(0:0/24:6(6Z,9Z,12Z,15Z,18Z,21Z)/0:0)	metab_2245	-	HMDB0011560	429.297	neg	-	-	64.819	0.180322	-	-	-	-	-	-	-	-	-	-	Lipids and lipid-like molecules	Glycerolipids	Monoradylglycerols	5.1617	5.0706	5.1363	5.2797	5.3477	5.5314	5.7582	6.4555	6.1856	5.9975	5.9744
neg_9070	Oxynarcotine	metab_2248	-	HMDB0030247	430.158	neg	-	-	104.209	0.239023	-	-	-	483-89-6	-	-	-	-	-	-	Alkaloids and derivatives	Aporphines	Not Available	4.5737	4.8312	4.4506	4.4449	4.2348	4.54	3.9105	4.148	4.3202	3.8525	3.9856
neg_9104	Diphenhydramine N-glucuronide	metab_2249	-	HMDB0060897	431.206	neg	-	-	43.074	0.0436619	-	-	-	-	-	-	-	-	-	-	Organic acids and derivatives	Carboxylic acids and derivatives	Amino acids, peptides, and analogues	4.8381	4.6146	4.9745	4.5041	4.8049	5.1583	3.9514	3.9219	4.4788	3.7885	4.6269
neg_9163	3a,7a,12a-Trihydroxy-5b-cholestan-26-al	metab_2258	C01301	HMDB0003533	433.328	neg	-	-	90.152	0.0763235	-	-	-	3836-01-09	-	-	map01100;map00120	Metabolic pathways; Primary bile acid biosynthesis	Metabolism;Metabolism	Global and overview maps;Lipid metabolism	Lipids and lipid-like molecules	Steroids and steroid derivatives	Bile acids, alcohols and derivatives	5.248	4.3766	4.6774	4.5466	4.8034	5.0524	4.6661	5.5557	5.452	5.15	5.489
neg_9204	Sertaconazole	metab_2264	-	HMDB0015284	434.997	neg	-	-	23.091	0.136716	-	-	-	99592-32-2	-	-	-	-	-	-	Organoheterocyclic compounds	Benzothiophenes	1-benzothiophenes	4.2354	3.9858	4.033	4.271	4.2767	4.1057	3.6103	3.3716	3.8267	4.0247	3.6793
neg_9212	Furaneol 4-(6-malonylglucoside)	metab_2267	-	HMDB0029778	435.126	neg	-	-	25.044	0.0748553	-	-	-	-	-	-	-	-	-	-	Organic oxygen compounds	Organooxygen compounds	Carbohydrates and carbohydrate conjugates	3.7689	2.6486	3.6622	3.9985	3.8217	3.952	4.0561	4.0222	4.1259	4.3847	4.349
neg_9401	Todatriol glucoside	metab_2278	-	HMDB0037260	442.162	neg	-	-	329.555	0.0941269	-	-	-	-	-	-	-	-	-	-	Lipids and lipid-like molecules	Fatty Acyls	Fatty acyl glycosides	3.3577	3.4078	3.4146	3.3278	3.1962	3.2656	3.5085	3.5352	3.5625	3.7719	3.4575
neg_9437	3a,6b,7b-Trihydroxy-5b-cholanoic acid	metab_2281	C17726	HMDB0000415	443.252	neg	-	-	181.228	0.150948	-	-	-	2393-59-1	-	-	-	-	-	-	Lipids and lipid-like molecules	Steroids and steroid derivatives	Bile acids, alcohols and derivatives	4.5515	4.1685	4.2622	4.5814	4.491	4.8053	4.4869	4.8132	4.8427	4.8853	5.1344
neg_9515	Benzethonium chloride	metab_2287	C12539	-	446.286	neg	-	-	174.874	0.0432105	-	-	-	-	-	-	-	-	-	-	-	-	-	3.9183	3.2918	3.8428	3.9658	4.2322	4.4607	4.3605	4.7393	4.8418	4.6469	4.7686
neg_9571	Browniine	metab_2289	C08665	-	448.265	neg	-	-	136.544	0.0653093	-	-	-	-	-	-	-	-	-	-	-	-	-	3.6825	3.4856	3.7568	3.7056	3.8117	4.0918	4.0612	4.3792	4.1143	4.3607	4.5218
neg_9704	3-hydroxyguanfacine glucuronide	metab_2301	-	HMDB0061096	453.227	neg	-	-	55.375	0.261419	-	-	-	-	-	-	-	-	-	-	Organic oxygen compounds	Organooxygen compounds	Carbohydrates and carbohydrate conjugates	4.0176	3.8028	4.0656	3.9257	3.9717	3.8084	4.5669	4.2177	4.8403	4.5746	4.8422
neg_9781	(2alpha,3alpha,5alpha,22R,23R)-2,3,22,23-Tetrahydroxy-25-methylergost-24(28)en-6-one	metab_2311	-	HMDB0039443	457.327	neg	-	-	103.386	0.270767	-	-	-	111618-87-2	-	-	-	-	-	-	Lipids and lipid-like molecules	Steroids and steroid derivatives	Bile acids, alcohols and derivatives	4.3083	4.2613	4.7837	4.6193	4.8779	4.9334	4.0358	4.1861	4.3378	4.0548	4.0244
neg_9797	5-Methyltetrahydrofolic acid	metab_2312	C00440	HMDB0001396	458.183	neg	-	-	316.873	0.114217	-	-	-	134-35-0	-	-	map01100;map01523;map01200;map00670	Metabolic pathways; Antifolate resistance; Carbon metabolism; One carbon pool by folate	Metabolism;Human Diseases;Metabolism;Metabolism	Global and overview maps;Drug resistance: antineoplastic;Global and overview maps;Metabolism of cofactors and vitamins	Organoheterocyclic compounds	Pteridines and derivatives	Pterins and derivatives	2.9471	3.0097	3.1251	2.7079	2.8211	2.7107	3.8465	3.6356	3.7281	3.8304	2.7399
neg_9860	Lucidenic acid M	metab_2315	-	HMDB0035973	461.289	neg	-	-	36.543	0.171472	-	-	-	110241-33-3	-	-	-	-	-	-	Phenylpropanoids and polyketides	Flavonoids	O-methylated flavonoids	4.6833	4.9325	4.6525	4.7663	4.9363	4.7563	4.1119	4.0788	4.4732	4.2421	4.6081
neg_9885	Adenylsuccinic acid	metab_2320	C03794	HMDB0000536	462.294	neg	-	-	172.313	0.0621798	-	-	-	19046-78-7	-	-	map01100;map00250;map00230	Metabolic pathways; Alanine, aspartate and glutamate metabolism; Purine metabolism	Metabolism;Metabolism;Metabolism	Global and overview maps;Amino acid metabolism;Nucleotide metabolism	Benzenoids	Benzene and substituted derivatives	Biphenyls and derivatives	4.6922	4.5095	4.7963	5.0308	5.0044	4.609	4.5225	4.3486	4.4403	4.0962	4.4891
neg_9903	Aripiprazole	metab_2323	C12564	HMDB0005042	463.161	neg	-	-	374.286	0.0890111	-	-	-	129722-12-9	-	-	-	-	-	-	Organoheterocyclic compounds	Diazinanes	Piperazines	3.5175	3.5754	3.5638	3.295	3.3479	3.3952	3.6816	3.6634	3.7153	3.8593	3.6686
neg_9906	Dulciol A	metab_2324	-	HMDB0029990	463.218	neg	-	-	137.688	0.114229	-	-	-	175617-23-9	-	-	-	-	-	-	Organoheterocyclic compounds	Benzopyrans	1-benzopyrans	3.4464	3.271	3.4233	3.3463	3.6084	3.6891	3.7525	3.8982	3.6734	3.9849	4.1239
neg_9964	LysoSM(d18:0)	metab_2329	-	HMDB0012082	465.36	neg	-	-	24.607	0.0816972	-	-	-	-	-	-	-	-	-	-	Lipids and lipid-like molecules	Sphingolipids	Phosphosphingolipids	5.8457	5.6662	5.8746	5.7586	5.888	5.8243	6.2041	6.1382	6.4641	5.9961	5.8138
neg_10021	Ebastine	metab_2332	-	HMDB0060159	468.3	neg	-	-	182.543	0.0548891	-	-	-	90729-43-4	-	-	-	-	-	-	Benzenoids	Benzene and substituted derivatives	Diphenylmethanes	4.1051	3.9969	4.0528	4.0088	4.0877	4.4476	4.361	4.228	4.3829	4.5206	4.7156
neg_10025	2-(a-Hydroxyethyl)thiamine diphosphate	metab_2333	C05125	HMDB0003904	468.361	neg	-	-	24.315	0.204083	-	-	-	10055-47-7	-	-	map00020;map00010;map01100;map00620	Citrate cycle (TCA cycle); Glycolysis / Gluconeogenesis; Metabolic pathways; Pyruvate metabolism	Metabolism;Metabolism;Metabolism;Metabolism	Carbohydrate metabolism;Carbohydrate metabolism;Global and overview maps;Carbohydrate metabolism	Organoheterocyclic compounds	Diazines	Pyrimidines and pyrimidine derivatives	3.9703	3.8931	4.065	3.9959	3.9893	4.0356	4.3024	4.2707	4.5401	4.1405	3.9912
neg_10040	Limonin	metab_2335	C03514	HMDB0035921	469.199	neg	-	-	430.238	0.105246	-	-	-	1180-71-8	-	-	-	-	-	-	Lipids and lipid-like molecules	Prenol lipids	Triterpenoids	3.632	3.8043	3.7932	3.3581	3.1629	3.1476	4.2284	3.8921	4.0491	4.4855	3.3324
neg_10111	CD 1790	metab_2341	-	HMDB0060809	472.199	neg	-	-	294.914	0.147935	-	-	-	-	-	-	-	-	-	-	Organoheterocyclic compounds	Imidazopyrimidines	Purines and purine derivatives	4.6269	4.7148	4.9687	3.9146	4.1209	4.2378	5.3813	5.3175	5.423	5.4616	4.4706
neg_10137	Polhovolide	metab_2343	C09532	-	473.14	neg	-	-	176.244	0.0575205	-	-	-	-	-	-	-	-	-	-	-	-	-	4.4857	4.14	4.7888	4.2961	4.6816	4.7829	4.8365	4.6547	5.0764	4.9805	5.6541
neg_10235	Azlocillin	metab_2353	C06839	HMDB0015194	477.142	neg	-	-	283.25	0.227993	-	-	-	37091-66-0	-	-	-	-	-	-	Organic acids and derivatives	Carboxylic acids and derivatives	Amino acids, peptides, and analogues	3.5588	3.4025	3.6457	3.1785	3.4472	3.3372	3.7366	3.5586	3.7467	3.8552	3.5905
neg_10266	LysoPE(0:0/18:1(9Z))	metab_2356	-	LMGP02050040;HMDB0011476	478.312	neg	-	-	237.996	0.028746	-	-	-	-	-	-	-	-	-	-	Lipids and lipid-like molecules	Glycerophospholipids	Glycerophosphoethanolamines	2.9426	2.62	2.9667	2.8367	3.3092	3.3046	3.2708	3.2942	3.7236	3.9705	3.8568
neg_10311	Pranlukast	metab_2360	-	HMDB0015481	480.184	neg	-	-	296.106	0.114128	-	-	-	103177-37-3	-	-	-	-	-	-	Organoheterocyclic compounds	Benzopyrans	1-benzopyrans	3.6744	3.6837	3.9052	3.0677	3.2595	3.2736	4.3544	4.1356	4.2375	4.2983	3.4698
neg_10314	Antibiotic JI-20A	metab_2361	C17704	-	480.27	neg	-	-	113.087	0.119187	-	-	-	-	-	-	map00524	Neomycin, kanamycin and gentamicin biosynthesis	Metabolism	Biosynthesis of other secondary metabolites	-	-	-	6.685	6.3379	6.5803	6.3146	6.287	6.6799	6.6248	7.0368	6.9807	6.6706	6.7221
neg_10315	Taurodeoxycholic acid	metab_2362	C05463	HMDB0000896;LMST05040013	480.27	neg	-	-	129.54	0.116649	-	-	-	516-50-7	-	-	-	-	-	-	Lipids and lipid-like molecules	Steroids and steroid derivatives	Bile acids, alcohols and derivatives	5.9954	5.804	6.0476	5.8436	5.8081	6.0775	6.1977	6.3865	6.4861	6.2095	6.2118
neg_10356	4'-Apo-beta,psi-caroten-4'-al	metab_2364	C19892	-	481.357	neg	-	-	26.053	0.098262	-	-	-	-	-	-	map01100	Metabolic pathways	Metabolism	Global and overview maps	-	-	-	4.4277	4.2743	4.48	4.2138	4.3937	4.4565	4.795	4.7353	5.0545	4.8938	4.8405
neg_10422	Chenodeoxyglycocholic acid	metab_2369	C05462	HMDB0006898	484.278	neg	-	-	193.514	0.232104	-	-	-	-	-	-	-	-	-	-	Lipids and lipid-like molecules	Steroids and steroid derivatives	Bile acids, alcohols and derivatives	2.7721	2.5326	2.9245	2.862	3.2409	3.3239	3.2068	3.5299	3.5644	3.5686	3.6935
neg_10448	Hovenine A	metab_2372	-	HMDB0030200	485.298	neg	-	-	168.302	0.0737211	-	-	-	52309-78-1	-	-	-	-	-	-	Organic acids and derivatives	Carboxylic acids and derivatives	Amino acids, peptides, and analogues	3.4588	2.981	3.5101	3.2358	3.4977	3.7572	3.8861	4.4434	4.301	3.7731	3.7292
neg_10452	3,7-Dihydroxy-25-methoxycucurbita-5,23-dien-19-al	metab_2373	-	HMDB0039362	485.358	neg	-	-	47.7815	0.186685	-	-	-	-	-	-	-	-	-	-	Lipids and lipid-like molecules	Steroids and steroid derivatives	Cucurbitacins	3.8804	3.9836	4.0737	3.7324	4.1702	3.7379	4.843	4.8128	4.7931	4.924	4.6352
neg_10479	Sofalcone	metab_2375	-	HMDB0042013	487.164	neg	-	-	48.487	0.297634	-	-	-	64506-49-6	-	-	-	-	-	-	Phenylpropanoids and polyketides	Linear 1,3-diarylpropanoids	Not Available	3.94	3.9069	3.8241	3.556	3.7659	3.9559	4.0613	4.3625	4.3848	4.013	3.9508
neg_10484	Prednicarbate	metab_2377	-	HMDB0015262	487.231	neg	-	-	213.804	0.149211	-	-	-	73771-04-7	-	-	-	-	-	-	Lipids and lipid-like molecules	Steroids and steroid derivatives	Pregnane steroids	3.1086	2.7131	2.8278	2.9139	3.0568	3.2768	3.2016	3.4744	3.2985	3.4691	3.7676
neg_10501	4-Hydroxy duloxetine glucuronide	metab_2380	-	HMDB0060763	488.157	neg	-	-	378.384	0.117284	-	-	-	-	-	-	-	-	-	-	Organic oxygen compounds	Organooxygen compounds	Carbohydrates and carbohydrate conjugates	3.5554	3.6273	3.5626	3.531	3.4194	3.3697	3.9702	3.7941	3.8246	3.9154	3.6289
neg_10510	10-Deoxymethymycin	metab_2381	C11994	LMPK04000035	488.273	neg	-	-	113.78	0.07149	-	-	-	-	-	-	map01100	Metabolic pathways	Metabolism	Global and overview maps	-	-	-	5.026	4.8466	5.0251	4.9078	5.342	5.2435	4.8128	4.7752	4.8708	4.7692	4.877
neg_10530	Calcium Gluceptate	metab_2382	-	-	489.075	neg	-	-	23.0755	0.186418	-	-	-	-	-	-	-	-	-	-	-	-	-	3.1314	3.0774	3.0493	3.1301	3.0133	2.8281	4.0352	4.0799	4.3179	4.5203	4.3355
neg_10547	Homaline	metab_2384	C10599	-	489.32	neg	-	-	34.644	0.148624	-	-	-	-	-	-	-	-	-	-	-	-	-	4.8252	5.0617	4.7901	4.9156	5.0552	4.9432	4.1127	4.2727	4.4805	4.2588	4.5741
neg_10615	Zygadenine	metab_2388	C10831	-	492.304	neg	-	-	133.784	0.0451293	-	-	-	-	-	-	-	-	-	-	-	-	-	4.818	4.547	4.7778	4.4907	4.6801	4.9004	4.711	4.8693	5.0385	5.0832	4.8994
neg_10676	Maraviroc	metab_2394	-	HMDB0015584	494.32	neg	-	-	175.115	0.103221	-	-	-	376348-65-1	-	-	-	-	-	-	Alkaloids and derivatives	Tropane alkaloids	Not Available	4.5888	4.4719	4.7081	4.6619	4.7458	4.6011	4.1186	4.0915	4.1174	4.2014	4.2079
neg_10707	16-Acetylpriverogenin A	metab_2397	-	HMDB0034529	495.338	neg	-	-	27.4945	0.117639	-	-	-	26339-85-5	-	-	-	-	-	-	Lipids and lipid-like molecules	Prenol lipids	Triterpenoids	4.1694	4.1144	4.1431	3.9891	4.0411	4.1965	4.3039	4.4156	4.6938	4.5903	4.3421
neg_10827	Cavipetin B	metab_2413	-	HMDB0030362	501.257	neg	-	-	48.757	0.220731	-	-	-	128530-03-0	-	-	-	-	-	-	Lipids and lipid-like molecules	Prenol lipids	Diterpenoids	3.6645	3.9512	4.1944	3.8131	4.1081	3.8352	4.4239	4.2427	4.2662	4.3333	4.1625
neg_10870	Luteolin 3'-(4''-acetylglucuronide)	metab_2415	-	HMDB0041384;LMPK12110704	503.092	neg	-	-	24.207	0.0976135	-	-	-	-	-	-	-	-	-	-	Phenylpropanoids and polyketides	Flavonoids	Flavonoid glycosides	3.2989	3.3104	3.4001	3.4609	3.4263	3.3391	4.0517	4.0374	4.207	4.5393	4.4878
neg_10942	Deltaline	metab_2422	C08679	-	506.285	neg	-	-	107.148	0.0763803	-	-	-	-	-	-	-	-	-	-	-	-	-	6.202	5.922	6.2341	5.8123	5.935	6.2157	6.3477	6.6973	6.7415	6.371	6.4758
neg_10983	CMP-N-trimethyl-2-aminoethylphosphonate	metab_2426	C05674	HMDB0060072	508.301	neg	-	-	105.766	0.0782921	-	-	-	-	-	-	map01100;map00440	Metabolic pathways; Phosphonate and phosphinate metabolism	Metabolism;Metabolism	Global and overview maps;Metabolism of other amino acids	Organic oxygen compounds	Organooxygen compounds	Carbohydrates and carbohydrate conjugates	6.8502	6.6707	6.8604	6.5701	6.5413	6.8869	7.1503	7.442	7.5795	7.2303	7.0717
neg_11016	Nb-Lignoceroyltryptamine	metab_2430	-	HMDB0040819	509.452	neg	-	-	44.245	0.0941692	-	-	-	152766-94-4	-	-	-	-	-	-	Organoheterocyclic compounds	Indoles and derivatives	Indoles	4.5746	4.7005	4.6585	4.8025	4.5749	4.3858	4.3169	4.3367	4.3377	3.9418	4.6506
neg_11045	Cefamandole fate	metab_2431	-	-	511.049	neg	-	-	223.192	0.257921	-	-	-	-	-	-	-	-	-	-	-	-	-	2.9392	3.0292	3.2129	3.2181	3.3188	3.073	3.4464	3.3811	3.1864	3.8555	3.4813
neg_11187	2-(Methoxycarbonyl)-5-methyl-2,4-bis(3-methyl-2-butenyl)-6-(2-methyl-1-oxopropyl)-5-(4-methyl-3-pentenyl)cyclohexanone	metab_2435	-	HMDB0035995	517.351	neg	-	-	32.952	0.227612	-	-	-	-	-	-	-	-	-	-	Lipids and lipid-like molecules	Prenol lipids	Monoterpenoids	4.3537	4.6453	4.3794	4.5878	4.5982	4.461	3.6639	3.9007	3.8146	3.7105	4.0556
neg_11203	1-O-Hexadecyl-lyso-sn-glycero-3-phosphocholine	metab_2438	C13903	-	518.279	neg	-	-	178.837	0.0981398	-	-	-	-	-	-	-	-	-	-	-	-	-	4.4638	4.3324	4.5941	4.4811	4.6699	4.4954	3.6663	3.736	3.7717	4.0465	4.2254
neg_11262	Mupirocin	metab_2442	C11758	HMDB0014554	521.284	neg	-	-	23.236	0.16228	-	-	-	12650-69-0	-	-	-	-	-	-	Lipids and lipid-like molecules	Fatty Acyls	Fatty acids and conjugates	3.3976	3.005	3.3584	3.2279	3.506	3.5356	3.9164	3.9574	4.1298	3.9784	3.9138
neg_11348	Cephaeline	metab_2454	C09390	-	525.284	neg	-	-	64.873	0.179706	-	-	-	-	-	-	-	-	-	-	-	-	-	4.2843	4.1344	4.235	4.5236	4.4464	4.5082	4.6575	5.0182	4.9772	5.03	5.027
neg_11350	Desmosine	metab_2456	-	HMDB0000572	525.283	neg	-	-	82.0035	0.100876	-	-	-	11003-57-9	-	-	-	-	-	-	Organic acids and derivatives	Carboxylic acids and derivatives	Tetracarboxylic acids and derivatives	3.9881	3.8294	3.9045	4.0769	4.2045	4.2104	4.2613	4.6832	4.589	4.5322	4.4809
neg_11377	LysoPC(14:0)	metab_2459	-	-	526.311	neg	-	-	181.892	0.0439167	-	-	-	-	-	-	-	-	-	-	-	-	-	4.9923	4.9332	5.2458	4.9846	5.294	5.1518	4.3756	4.3085	4.387	4.7858	5.052
neg_11412	Glycochenodeoxycholate-3-sulfate	metab_2462	-	HMDB0002497	528.269	neg	-	-	104.452	0.132103	-	-	-	67030-54-0	-	-	-	-	-	-	Lipids and lipid-like molecules	Steroids and steroid derivatives	Bile acids, alcohols and derivatives	6.0597	5.8859	6.2131	5.8237	5.8522	6.1802	6.1915	6.5045	6.5529	6.5937	6.531
neg_11434	Cinncassiol D2 glucoside	metab_2464	-	HMDB0034679	529.272	neg	-	-	123.009	0.0689154	-	-	-	-	-	-	-	-	-	-	Lipids and lipid-like molecules	Prenol lipids	Terpene glycosides	4.913	4.7586	5.0103	4.7543	4.8459	4.9899	5.2233	5.3712	5.3778	5.3754	5.3169
neg_11453	CDP-4-dehydro-3,6-dideoxy-D-glucose	metab_2466	C04297	-	530.298	neg	-	-	177.025	0.041706	-	-	-	-	-	-	map01100;map00520	Metabolic pathways; Amino sugar and nucleotide sugar metabolism	Metabolism;Metabolism	Global and overview maps;Carbohydrate metabolism	-	-	-	7.0752	6.9552	7.1362	7.0616	7.1494	7.0916	6.8506	6.8406	6.8347	6.982	6.9533
neg_11469	Trichotomine	metab_2468	C09247	-	531.144	neg	-	-	198.5	0.0718272	-	-	-	-	-	-	-	-	-	-	-	-	-	2.5976	2.4247	2.567	2.5239	2.6239	2.5644	3	2.9478	3.0539	3.3149	3.2516
neg_11513	Isosyringinoside	metab_2472	-	HMDB0040814	533.178	neg	-	-	374.994	0.105307	-	-	-	152686-85-6	-	-	-	-	-	-	Organic oxygen compounds	Organooxygen compounds	Carbohydrates and carbohydrate conjugates	3.1825	3.2476	3.3354	2.9889	3.0229	3.076	3.9712	3.5655	3.7061	4.205	3.3342
neg_11531	Malvidin 3-(6-acetylglucoside)	metab_2473	-	HMDB0038008	534.138	neg	-	-	23.045	0.0873557	-	-	-	101072-66-6	-	-	-	-	-	-	Phenylpropanoids and polyketides	Flavonoids	Flavonoid glycosides	3.2286	3.1351	2.9904	3.2663	3.2763	3.1786	3.7644	3.6054	3.9214	4.1212	3.9362
neg_11596	Cucurbitacin E	metab_2477	C08797	LMST01010107	537.281	neg	-	-	25.601	0.148739	-	-	-	-	-	-	-	-	-	-	-	-	-	4.0598	3.4756	4.0935	3.6966	4.1087	4.2096	4.7194	4.8663	4.7898	4.3023	4.5502
neg_11645	Ganoderic acid C2	metab_2480	-	HMDB0035304	539.297	neg	-	-	26.9235	0.117677	-	-	-	98296-48-1	-	-	-	-	-	-	Lipids and lipid-like molecules	Prenol lipids	Triterpenoids	4.9707	4.3759	5.0811	4.4401	4.984	4.9493	5.213	5.4736	5.3424	4.9165	5.2648
neg_11657	VPGPR Enterostatin	metab_2481	-	HMDB0003577	540.325	neg	-	-	178.799	0.103921	-	-	-	144964-56-7	-	-	-	-	-	-	Organic acids and derivatives	Carboxylic acids and derivatives	Amino acids, peptides, and analogues	4.7657	4.768	5.1065	4.6968	5.0494	4.9168	4.4395	4.136	4.1788	4.5841	4.63
neg_11669	4'-Methylisoscutellarein 8-(2''-sulfoglucoside)	metab_2483	-	HMDB0038779	541.074	neg	-	-	23.045	0.127239	-	-	-	136516-95-5	-	-	-	-	-	-	Phenylpropanoids and polyketides	Flavonoids	Flavonoid glycosides	2.7172	2.6575	2.5452	2.7563	2.5812	2.5312	3.6739	3.709	3.8953	4.0442	4.1729
neg_11752	Hovenidulcigenin B	metab_2488	-	HMDB0041547	545.354	neg	-	-	89.231	0.0259422	-	-	-	182173-50-8	-	-	-	-	-	-	Lipids and lipid-like molecules	Prenol lipids	Terpene lactones	3.5056	3.2729	3.5366	3.4336	3.5876	3.6076	3.38	4.2789	4.0667	3.7608	3.894
neg_11809	2,5-Diamino-6-(5'-triphosphoryl-3',4'-trihydroxy-2'-oxopentyl)-amino-4-oxopyrimidine	metab_2492	C06148	HMDB0006823	548.155	neg	-	-	24.0905	0.169099	-	-	-	-	-	-	map01100;map00790	Metabolic pathways; Folate biosynthesis	Metabolism;Metabolism	Global and overview maps;Metabolism of cofactors and vitamins	Organic oxygen compounds	Organooxygen compounds	Carbohydrates and carbohydrate conjugates	3.0106	2.6698	2.7303	2.9161	2.8686	2.7131	3.58	3.386	3.4765	3.9315	3.8806
neg_11855	Simmondsin 2'-ferulate	metab_2494	-	HMDB0035475	550.199	neg	-	-	42.019	0.114474	-	-	-	179466-18-3	-	-	-	-	-	-	Phenylpropanoids and polyketides	Cinnamic acids and derivatives	Hydroxycinnamic acids and derivatives	4.2809	4.1705	4.2799	4.2436	4.398	4.4099	4.0486	4.1122	4.1681	3.918	3.9724
neg_11891	Vignatic acid A	metab_2498	-	HMDB0033599	552.268	neg	-	-	104.289	0.256661	-	-	-	181485-19-8	-	-	-	-	-	-	Organic acids and derivatives	Carboxylic acids and derivatives	Amino acids, peptides, and analogues	5.1257	4.9997	5.5749	4.8613	5.1509	5.4222	5.3901	5.7003	5.7333	5.4997	5.6955
neg_11897	LysoPE(24:6(6Z,9Z,12Z,15Z,18Z,21Z)/0:0)	metab_2499	-	LMGP02050073;HMDB0011529	552.304	neg	-	-	171.411	0.0748654	-	-	-	-	-	-	-	-	-	-	Lipids and lipid-like molecules	Glycerophospholipids	Glycerophosphoethanolamines	4.5944	4.3212	4.8463	4.3804	4.8198	4.6639	4.0653	4.1255	4.1823	4.2936	4.3559
neg_12040	LysoPC(18:2(9Z,12Z))	metab_2511	-	HMDB0010386	559.358	neg	-	-	62.474	0.0602705	-	-	-	-	-	-	-	-	-	-	Lipids and lipid-like molecules	Glycerophospholipids	Glycerophosphocholines	3.4719	3.4181	3.3307	3.3085	3.1577	3.7163	3.3046	4.4365	4.1366	3.8191	4.0073
neg_12064	5,7-Dihydroxy-3',4'-dimethoxy-8-(3-hydroxy-3-methylbutyl)-isoflavone 7-glucoside	metab_2512	-	HMDB0034812	561.209	neg	-	-	359.126	0.127887	-	-	-	-	-	-	-	-	-	-	Phenylpropanoids and polyketides	Isoflavonoids	Isoflavonoid O-glycosides	2.9353	3.0258	3.1366	2.1597	2.6122	2.5213	3.5416	3.1948	3.2366	3.4851	2.7118
neg_12187	Deoxycholic acid 3-glucuronide	metab_2521	C03033	LMST05010046;HMDB0002596	567.311	neg	-	-	110.546	0.044408	-	-	-	72504-58-6	-	-	map01100;map00040;map04976	Metabolic pathways; Pentose and glucuronate interconversions; Bile secretion	Metabolism;Metabolism;Organismal Systems	Global and overview maps;Carbohydrate metabolism;Digestive system	Lipids and lipid-like molecules	Steroids and steroid derivatives	Steroidal glycosides	3.8492	3.7445	4.0805	3.8917	4.179	4.2454	4.5216	4.8482	4.592	4.7157	4.3631
neg_12230	Pyrrhoxanthinol	metab_2522	-	HMDB0035696	569.328	neg	-	-	146.576	0.146025	-	-	-	54369-11-8	-	-	-	-	-	-	Lipids and lipid-like molecules	Prenol lipids	Terpene lactones	4.4718	4.3095	4.761	4.1684	4.6689	4.8807	4.7108	5.0667	5.0227	5.1546	4.8667
neg_12235	3,4-Dihydrospheroidene	metab_2524	C15895	-	569.472	neg	-	-	104.14	0.218561	-	-	-	-	-	-	map01100	Metabolic pathways	Metabolism	Global and overview maps	-	-	-	3.7092	3.6006	3.7791	3.7083	3.7818	3.5571	4.4115	4.5147	4.6428	4.6505	4.5454
neg_12317	Zafirlukast	metab_2528	C07206	HMDB0014689	574.204	neg	-	-	377.511	0.181536	-	-	-	107753-78-6	-	-	-	-	-	-	Benzenoids	Benzene and substituted derivatives	Benzenesulfonamides	3.5353	3.6618	3.714	2.909	3.019	3.1638	4.2429	3.7811	3.9567	4.4386	3.4745
neg_12400	N-Acetyl-O-demethylpuromycin-5'-phosphate	metab_2535	C07030	-	578.188	neg	-	-	371.841	0.0676335	-	-	-	-	-	-	map01100	Metabolic pathways	Metabolism	Global and overview maps	-	-	-	2.8814	3.1731	3.079	2.7605	2.8268	2.7318	3.7081	3.5713	3.5937	3.6722	2.9619
neg_12425	beta-Doradecin	metab_2538	-	HMDB0039143	579.385	neg	-	-	139.9	0.0522204	-	-	-	31460-54-5	-	-	-	-	-	-	Lipids and lipid-like molecules	Prenol lipids	Tetraterpenoids	4.4222	4.4675	4.4712	4.4619	4.68	4.546	4.0625	3.8724	3.7699	4.1801	3.9941
neg_12495	Cholic acid glucuronide	metab_2543	-	HMDB0002577;LMST05010044	583.306	neg	-	-	137.167	0.106408	-	-	-	76060-22-5	-	-	-	-	-	-	Lipids and lipid-like molecules	Steroids and steroid derivatives	Steroidal glycosides	3.8247	3.6918	3.9652	3.9662	3.8241	4.1175	4.3544	4.6993	4.533	4.7618	4.7256
neg_12509	Janthitrem B	metab_2545	C20600	HMDB0030528	584.343	neg	-	-	171.505	0.0870021	-	-	-	73561-90-7	-	-	-	-	-	-	Organoheterocyclic compounds	Naphthopyrans	Not Available	5.1297	5.0118	5.2168	5.1485	5.3649	5.0936	4.832	4.7551	4.8537	5.0618	5.1427
neg_12613	2-Hydroxyestrone-4-S-glutathione	metab_2551	-	HMDB0012624	590.236	neg	-	-	43.928	0.116654	-	-	-	-	-	-	-	-	-	-	Organic acids and derivatives	Carboxylic acids and derivatives	Amino acids, peptides, and analogues	4.8935	4.292	4.3565	5.0744	4.8176	5.3382	5.4741	5.3249	5.8425	5.4512	5.1804
neg_12668	Obamegine	metab_2555	C06513	-	593.277	neg	-	-	98.88	0.221185	-	-	-	-	-	-	-	-	-	-	-	-	-	4.7438	4.4465	4.2515	4.496	4.4575	4.5176	4.8442	4.6044	4.7685	4.6326	4.6707
neg_12686	Kni 102	metab_2557	C15654	-	594.292	neg	-	-	185.646	0.116524	-	-	-	-	-	-	-	-	-	-	-	-	-	4.1878	3.9125	3.9691	4.2281	4.2103	4.0778	3.8394	3.7247	3.6123	3.7434	4.1206
neg_12886	24-Acetyl- 25-cinnamoylvulgaroside	metab_2576	-	HMDB0041368	607.342	neg	-	-	82.65	0.0227407	-	-	-	172616-89-6	-	-	-	-	-	-	Lipids and lipid-like molecules	Prenol lipids	Sesterterpenoids	3.4739	3.4525	3.5564	3.4597	3.4986	3.6239	4.0442	4.4372	4.4161	4.258	3.9905
neg_12905	Avenestergenin B2	metab_2579	-	HMDB0035266	608.387	neg	-	-	171.436	0.0944123	-	-	-	90578-32-8	-	-	-	-	-	-	Lipids and lipid-like molecules	Prenol lipids	Triterpenoids	4.197	4.1993	4.3648	4.238	4.4583	4.3201	3.9689	3.8906	3.9683	4.1344	4.1921
neg_12952	(24E)-3beta,15alpha,22S-Triacetoxylanosta-7,9(11),24-trien-26-oic acid	metab_2583	-	HMDB0035606	611.374	neg	-	-	101.861	0.0633657	-	-	-	112430-70-3	-	-	-	-	-	-	Lipids and lipid-like molecules	Prenol lipids	Triterpenoids	3.7537	3.4744	3.7204	3.7097	3.8049	3.8832	4.2797	4.8026	4.5496	4.4891	4.167
neg_13017	Oryzanol C	metab_2592	-	HMDB0035121	615.455	neg	-	-	104.177	0.201944	-	-	-	-	-	-	-	-	-	-	Lipids and lipid-like molecules	Steroids and steroid derivatives	Cycloartanols and derivatives	3.6241	3.4179	3.7121	3.7459	3.9952	3.5347	3.9433	3.8633	4.1007	4.0565	3.911
neg_13040	Minosaminomycin	metab_2595	C17969	-	617.338	neg	-	-	113.462	0.0981894	-	-	-	-	-	-	-	-	-	-	-	-	-	3.341	3.2233	3.381	3.3533	3.7021	3.4528	3.9538	3.7301	3.5418	3.6936	3.4345
neg_13051	Lolitriol	metab_2596	C20548	-	618.336	neg	-	-	186.386	0.0270388	-	-	-	-	-	-	-	-	-	-	-	-	-	5.0314	4.5436	4.7071	5.0844	5.0941	4.8433	4.4225	4.2893	3.834	3.9085	4.792
neg_13133	CE(16:0)	metab_2600	C11251	HMDB0000885;LMST01020005	624.06	neg	-	-	279.382	0.254544	-	-	-	601-34-3	-	-	-	-	-	-	Lipids and lipid-like molecules	Steroids and steroid derivatives	Steroid esters	3.6316	3.6974	3.6475	3.8026	3.7186	3.7435	3.1433	3.1773	2.9193	3.0656	3.4224
neg_13155	Antibiotic X 14889D	metab_2601	-	HMDB0033334	625.442	neg	-	-	42.6645	0.136154	-	-	-	97671-94-8	-	-	-	-	-	-	Lipids and lipid-like molecules	Prenol lipids	Sesterterpenoids	4.2711	4.1361	4.1874	4.1326	4.0969	4.0854	4.0085	3.7174	3.9958	4.0095	4.0438
neg_13166	Dabigatran etexilate	metab_2602	-	HMDB0015641	626.305	neg	-	-	300.557	0.0807892	-	-	-	211915-06-9	-	-	-	-	-	-	Organic oxygen compounds	Organooxygen compounds	Alcohols and polyols	3.6622	3.6475	3.4753	3.6625	3.8456	3.1943	3.4305	3.3525	3.3318	3.0235	3.3951
neg_13167	UDP-2-acetamido-2,6-dideoxy-beta-L-talose	metab_2603	C20768	-	626.34	neg	-	-	171.381	0.0505346	-	-	-	-	-	-	-	-	-	-	-	-	-	4.5884	4.3134	4.9461	4.3464	4.8279	4.689	4.1354	4.1304	4.1919	4.2784	4.3801
neg_13358	Benzonatate	metab_2618	-	HMDB0015006	638.324	neg	-	-	218.195	0.064431	-	-	-	104-31-4	-	-	-	-	-	-	Benzenoids	Benzene and substituted derivatives	Benzoic acids and derivatives	3.8546	3.649	4.1278	3.3419	3.7619	3.2402	4.347	4.1517	4.4265	4.0931	3.6411
neg_13388	(3a,5b,7a,12a)-24-[(carboxymethyl)amino]-1,12-dihydroxy-24-oxocholan-3-yl-b-D-Glucopyranosiduronic acid	metab_2620	-	LMST05010053;LMST05010029;HMDB0002472	640.34	neg	-	-	216.451	0.0436808	-	-	-	99794-78-2	-	-	-	-	-	-	Organic nitrogen compounds	Organonitrogen compounds	Oximes	3.8518	3.6155	4.0579	3.3369	3.6449	3.3771	4.3902	4.1832	4.4545	3.9911	3.6513
neg_13530	Egonol gentiobioside	metab_2634	-	HMDB0034281	649.224	neg	-	-	378.642	0.168125	-	-	-	-	-	-	-	-	-	-	Phenylpropanoids and polyketides	2-arylbenzofuran flavonoids	Not Available	3.1947	3.3673	3.4264	2.8905	2.9096	2.9836	3.9938	3.7025	3.8238	4.0161	3.1772
neg_13619	Gossypetin 8-glucuronide 3-glucoside	metab_2641	-	HMDB0039103	655.129	neg	-	-	26.314	0.108003	-	-	-	135010-45-6	-	-	-	-	-	-	Phenylpropanoids and polyketides	Flavonoids	Flavonoid glycosides	4.605	4.6206	4.5872	4.4199	4.5228	4.4817	3.9483	4.6037	4.2213	4.2141	4.4511
neg_13849	Scutellarein 7-glucuronosyl-(1-&gt	metab_2652	-	-	673.44	neg	-	-	41.364	0.138227	-	-	-	-	-	-	-	-	-	-	-	-	-	4.4941	4.4461	4.8145	4.3507	4.6264	4.677	4.2206	4.2684	4.5664	4.3075	4.2989
neg_13873	Diadenosine diphosphate	metab_2654	-	HMDB0001312	675.415	neg	-	-	101.94	0.146648	-	-	-	14938-28-4	-	-	-	-	-	-	Nucleosides, nucleotides, and analogues	(3'->5')-dinucleotides and analogues	(3'->5')-dinucleotides	3.4056	3.1153	3.3102	3.302	3.4458	3.5338	3.5611	3.9729	3.9388	3.9038	3.6859
neg_14079	DG(22:5(7Z,10Z,13Z,16Z,19Z)/20:3(5Z,8Z,11Z)/0:0)	metab_2669	-	HMDB0007748	692.066	neg	-	-	339.408	0.170725	-	-	-	-	-	-	-	-	-	-	Lipids and lipid-like molecules	Glycerolipids	Diradylglycerols	3.9958	3.9591	3.9741	4.1772	4.1554	4.0848	3.8483	3.7231	3.8789	3.9012	3.8628
neg_14244	Viomycin	metab_2682	C01540	-	706.315	neg	-	-	266.852	0.0411752	-	-	-	-	-	-	-	-	-	-	-	-	-	3.3568	3.0525	3.4013	3.0793	3.1262	3.1257	3.7906	3.8084	3.7477	3.5431	3.3606
neg_14632	Pseudoargiopinin I	metab_2707	C20096	-	742.497	neg	-	-	44.5095	0.0591798	-	-	-	-	-	-	-	-	-	-	-	-	-	4.8877	4.9421	5.1434	4.9887	5.0373	4.9774	5.5901	5.606	5.459	5.4186	5.3895
neg_14717	Bacteriohopanetetrol-acetylglucosamine	metab_2711	C21120	-	749.074	neg	-	-	279.541	0.187101	-	-	-	-	-	-	-	-	-	-	-	-	-	3.7323	3.6823	3.6741	3.8791	3.8337	3.9	3.1735	3.2181	3.1076	3.079	3.3929
neg_14872	PE(20:4(8Z,11Z,14Z,17Z)/18:1(9Z))	metab_2725	-	HMDB0009422	764.515	neg	-	-	42.665	0.258117	-	-	-	-	-	-	-	-	-	-	Lipids and lipid-like molecules	Glycerophospholipids	Glycerophosphoethanolamines	4.5946	4.542	4.5843	4.474	4.7018	4.5257	4.3303	4.2479	4.4091	4.4167	4.4851
neg_14948	Guanosine triphosphate adenosine	metab_2731	-	HMDB0001459	771.055	neg	-	-	279.501	0.20577	-	-	-	10527-47-6	-	-	-	-	-	-	Nucleosides, nucleotides, and analogues	(5'->5')-dinucleotides	Not Available	3.7041	3.7332	3.6796	3.7234	3.7214	3.731	3.1771	3.2591	3.0903	3.1121	3.5047
neg_14982	Oligomycin C	metab_2733	C11313	-	774.067	neg	-	-	339.411	0.0880092	-	-	-	-	-	-	-	-	-	-	-	-	-	3.928	3.896	3.8724	3.9675	4.0282	3.8488	3.5996	3.577	3.6433	3.682	3.6895
neg_15131	Immunomycin	metab_2746	C12102	-	790.496	neg	-	-	43.9165	0.114554	-	-	-	-	-	-	-	-	-	-	-	-	-	4.9094	4.9076	5.3428	4.9254	5.1113	5.2246	5.3678	5.4542	5.2705	5.127	5.2844
neg_15394	PC(14:1(9Z)/22:2(13Z,16Z))	metab_2764	-	LMGP01011406;HMDB0007921	818.527	neg	-	-	43.269	0.273058	-	-	-	-	-	-	-	-	-	-	Lipids and lipid-like molecules	Glycerophospholipids	Glycerophosphocholines	4.3198	4.1887	4.6375	4.3431	4.3284	4.4553	4.8412	4.9205	4.6871	4.7011	4.773
neg_15776	PI(18:1(9Z)/18:3(9Z,12Z,15Z))	metab_2789	-	LMGP06010850;HMDB0009840	857.512	neg	-	-	177.653	0.0918844	-	-	-	-	-	-	-	-	-	-	Lipids and lipid-like molecules	Glycerophospholipids	Glycerophosphoinositols	5.4961	5.4752	5.4424	5.5325	5.6336	5.4352	5.0934	4.8851	4.8739	5.2528	5.3869
neg_15955	Pectenotoxin 2 secoacid	metab_2802	-	HMDB0040133	875.486	neg	-	-	131.638	0.191005	-	-	-	212502-87-9	-	-	-	-	-	-	Organic oxygen compounds	Organooxygen compounds	Carbohydrates and carbohydrate conjugates	4.0538	4.3642	3.9162	4.2626	4.2278	4.2771	4.2239	3.727	3.7999	3.9535	3.8852
neg_16025	Elatoside E	metab_2806	-	HMDB0040852	881.511	neg	-	-	176.953	0.0855994	-	-	-	156980-30-2	-	-	-	-	-	-	Lipids and lipid-like molecules	Prenol lipids	Triterpenoids	4.4857	4.3097	4.5583	4.4617	4.6651	4.5233	4.0822	3.9623	3.8973	4.2376	4.3176
neg_16168	Momordin Ie	metab_2816	-	HMDB0041020	896.069	neg	-	-	279.709	0.22951	-	-	-	96158-13-3	-	-	-	-	-	-	Lipids and lipid-like molecules	Prenol lipids	Terpene glycosides	3.6526	3.5147	3.559	3.6574	3.5802	3.619	2.9518	3.1475	2.8552	3.0984	3.3173
neg_16324	PS(20:3(8Z,11Z,14Z)/22:6(4Z,7Z,10Z,13Z,16Z,19Z))	metab_2823	-	HMDB0012428;LMGP03010619	916.564	neg	-	-	125.748	0.168088	-	-	-	-	-	-	-	-	-	-	Lipids and lipid-like molecules	Glycerophospholipids	Glycerophosphoserines	4.1323	3.9988	4.3928	4.3726	4.4443	4.3752	3.8766	3.7734	3.8749	4.0869	4.1628
neg_16360	TG(20:0/18:3(9Z,12Z,15Z)/20:2n6)	metab_2825	-	HMDB0046088	922.484	neg	-	-	114.716	0.235305	-	-	-	-	-	-	-	-	-	-	Lipids and lipid-like molecules	Glycerolipids	Triradylcglycerols	4.0832	4.2115	4.1004	4.1621	4.2845	4.3573	4.0616	3.7492	3.7163	3.8575	3.867
neg_17876	Valinomycin	metab_2906	C06684	-	1145.62	neg	-	-	171.952	0.18658	-	-	-	-	Antibiotics	Polyketides and nonribosomal peptides	-	-	-	-	-	-	-	3.75	3.3681	4.108	3.5373	3.9665	3.8469	3.131	3.3058	3.3009	3.3188	3.5349

## Sheet: DM vs MET
ID	Metabolite	Metab ID	KEGG Compound ID	Library ID	M/Z	Mode	Adducts	Formula	Retention time	RSD	Fragmentation Score	Theoretical Fragmentation Score	Mass Error	CAS ID	KEGG Compound First Category	KEGG Compound Second Category	KEGG Pathway ID	KEGG Pathway Description	KEGG Pathway First Category	KEGG Pathway Second Category	HMDB Superclass	HMDB Class	HMDB Subclass	DM_1	DM_2	DM_3	DM_4	DM_5	MET_1	MET_2	MET_3	MET_4	MET_5	MET_6	MET_7
pos_1053	1-Methyl-1,3-cyclohexadiene	metab_134	-	HMDB0031532	158.095	pos	-	-	36.908	0.118668	-	-	-	1489-56-1	-	-	-	-	-	-	Hydrocarbons	Unsaturated hydrocarbons	Branched unsaturated hydrocarbons	4.7955	4.7	4.7702	4.7547	4.7031	4.7442	4.7889	4.9309	4.8131	4.8527	4.8322	4.7843
pos_1074	5-Butyl-1,4-dioxan-2-one	metab_139	-	HMDB0059938	159.09	pos	-	-	240.997	0.154225	-	-	-	-	-	-	-	-	-	-	Organoheterocyclic compounds	Dioxanes	1,4-dioxanes	4.8503	5.121	4.9453	5.0226	5.101	4.8503	4.8531	4.8082	4.6817	4.7545	4.9518	4.8241
pos_1483	N-Acetyl-b-D-galactosamine	metab_200	C05021	HMDB0000853	186.075	pos	-	-	245.004	0.0470911	-	-	-	14131-60-3	-	-	-	-	-	-	Organic oxygen compounds	Organooxygen compounds	Carbohydrates and carbohydrate conjugates	4.2597	4.245	4.3303	4.3663	4.1548	4.0832	4.2956	4.1127	4.129	4.1616	4.18	4.1648
pos_1499	Pseudoecgonine	metab_204	C12449	HMDB0006348	186.22	pos	-	-	140.044	0.02465	-	-	-	-	-	-	-	-	-	-	Alkaloids and derivatives	Tropane alkaloids	Not Available	4.1808	4.2461	4.406	4.9907	4.1952	4.1517	4.1222	3.9473	4.0612	3.9582	4.2918	4.1131
pos_1676	Methionine sulfoximine	metab_229	C03510	HMDB0029430	198.084	pos	-	-	372.35	0.0619338	-	-	-	1982-67-8	-	-	-	-	-	-	Organic acids and derivatives	Carboxylic acids and derivatives	Amino acids, peptides, and analogues	5.2092	5.2879	5.2946	5.2931	5.3231	5.1663	5.2738	5.1645	5.1643	5.2142	5.2549	5.1848
pos_2271	Gamma-Aminobutyryl-lysine	metab_304	-	HMDB0001959	232.153	pos	-	-	239.605	0.0392249	-	-	-	22468-02-6	-	-	-	-	-	-	Organic acids and derivatives	Peptidomimetics	Hybrid peptides	5.4643	5.4314	5.5028	5.5446	5.8198	5.3019	5.2616	5.0983	4.8687	5.0997	5.6215	5.0691
pos_2472	5-Methyldeoxycytidine	metab_324	C03592	HMDB0002224	242.112	pos	-	-	185.402	0.0789246	-	-	-	838-07-3	-	-	-	-	-	-	Nucleosides, nucleotides, and analogues	Pyrimidine nucleosides	Pyrimidine 2'-deoxyribonucleosides	4.5007	4.4033	4.5131	4.5229	4.3536	4.7184	4.5062	4.8613	4.4695	4.6011	4.5884	4.868
pos_4621	2-Descarboxy-betanidin	metab_591	C17757	-	346.331	pos	-	-	51.259	0.18964	-	-	-	-	-	-	-	-	-	-	-	-	-	4.8645	4.7536	4.7575	4.7805	4.6755	4.4568	4.572	4.6601	4.4649	4.6943	4.7521	4.686
pos_4795	2-O-p-Coumaroylhydroxycitric acid	metab_609	-	HMDB0040570	355.262	pos	-	-	209.801	0.0549409	-	-	-	62345-85-1	-	-	-	-	-	-	Phenylpropanoids and polyketides	Cinnamic acids and derivatives	Hydroxycinnamic acids and derivatives	4.7411	4.5827	5.1172	5.0102	4.989	4.1588	4.528	4.851	4.508	4.4003	4.8837	4.4227
pos_4836	Acaciabiuronic acid	metab_615	-	HMDB0029938	357.277	pos	-	-	157.19	0.0546327	-	-	-	7264-19-9	-	-	-	-	-	-	Organic oxygen compounds	Organooxygen compounds	Carbohydrates and carbohydrate conjugates	4.0879	4.4711	4.5529	3.9833	4.6447	3.4519	3.6196	3.9726	3.9559	3.62	3.6867	3.6029
pos_5064	3, 5-Tetradecadiencarnitine	metab_637	-	HMDB0013331	368.278	pos	-	-	162.54	0.0398831	-	-	-	-	-	-	-	-	-	-	-	-	-	4.1347	4.1635	4.2389	4.1492	4.2705	4.1534	4.0701	4.0841	4.0734	4.1684	4.092	4.1835
pos_5464	2-Hydroxymyristoylcarnitine	metab_679	-	HMDB0013166;LMFA07070033	388.304	pos	-	-	183.924	0.0239883	-	-	-	-	-	-	-	-	-	-	Lipids and lipid-like molecules	Fatty Acyls	Fatty acid esters	3.8305	3.8676	3.9583	3.8509	3.9422	4.1712	3.9834	4.0225	4.0123	4.0975	3.9252	4.2132
pos_6012	LPA(0:0/18:2(9Z,12Z))	metab_721	C00416	LMGP10050044	417.238	pos	-	-	233.335	0.0663203	-	-	-	-	Lipids	Phospholipids	map01100;map00564;map04070;map00561;map05212;map05200;map04975;map04024;map04072;map04912;map05231;map04666	Metabolic pathways; Glycerophospholipid metabolism; Phosphatidylinositol signaling system; Glycerolipid metabolism; Pancreatic cancer; Pathways in cancer; Fat digestion and absorption; cAMP signaling pathway; Phospholipase D signaling pathway; GnRH signaling pathway; Choline metabolism in cancer; Fc gamma R-mediated phagocytosis	Metabolism;Metabolism;Environmental Information Processing;Metabolism;Human Diseases;Human Diseases;Organismal Systems;Environmental Information Processing;Environmental Information Processing;Organismal Systems;Human Diseases;Organismal Systems	Global and overview maps;Lipid metabolism;Signal transduction;Lipid metabolism;Cancer: specific types;Cancer: overview;Digestive system;Signal transduction;Signal transduction;Endocrine system;Cancer: overview;Immune system	-	-	-	4.386	4.3464	4.5116	4.4739	4.4099	4.3059	4.365	4.2883	4.2005	4.3185	4.3058	4.322
pos_6681	Bispyribac-sodium	metab_777	C18453	-	454.351	pos	-	-	209.814	0.175625	-	-	-	-	-	-	-	-	-	-	-	-	-	4.5137	4.4114	5.0189	4.8801	4.9293	3.5693	4.0885	4.6006	4.1121	3.9725	4.8411	4.0332
pos_6696	SAICAR	metab_782	C04823	HMDB0000797	455.283	pos	-	-	45.86	0.0657635	-	-	-	3031-95-6	-	-	map01100;map00230	Metabolic pathways; Purine metabolism	Metabolism;Metabolism	Global and overview maps;Nucleotide metabolism	Nucleosides, nucleotides, and analogues	Imidazole ribonucleosides and ribonucleotides	1-ribosyl-imidazolecarboxamides	4.0525	4.3304	4.3257	4.1006	4.2413	4.169	4.087	4.0605	3.9945	4.079	3.9132	4.148
pos_6926	Vitamin K1 2,3-epoxide	metab_802	C05849	HMDB0002972	467.346	pos	-	-	209.746	0.0797321	-	-	-	25486-55-9	-	-	map01100;map00130	Metabolic pathways; Ubiquinone and other terpenoid-quinone biosynthesis	Metabolism;Metabolism	Global and overview maps;Metabolism of cofactors and vitamins	Lipids and lipid-like molecules	Prenol lipids	Quinone and hydroquinone lipids	4.3349	4.2517	4.7582	4.5965	4.6096	3.3975	3.964	4.4246	3.984	3.8655	4.6124	3.9815
pos_9045	Penitrem B	metab_974	C20731	-	584.331	pos	-	-	182.638	0.0695945	-	-	-	-	-	-	-	-	-	-	-	-	-	3.9168	3.9188	3.6145	3.4769	4.2792	4.7558	3.857	4.3359	4.1557	4.1127	4.1588	4.3569
pos_9783	Faradiol laurate	metab_1014	-	HMDB0034840	626.033	pos	-	-	338.638	0.139372	-	-	-	270078-40-5	-	-	-	-	-	-	Lipids and lipid-like molecules	Prenol lipids	Triterpenoids	3.4233	3.4176	3.563	3.5042	3.3394	3.6488	3.493	3.6868	3.434	3.5333	3.5987	3.6404
pos_10506	Glycerol 1,2-didodecanoate 3-tetradecanoate	metab_1057	-	HMDB0031124	668.07	pos	-	-	20.923	0.11402	-	-	-	60175-30-6	-	-	-	-	-	-	Lipids and lipid-like molecules	Glycerolipids	Triradylcglycerols	4.2336	4.2787	4.4739	5.0347	4.1471	4.2227	4.3827	4.019	3.661	3.7406	4.111	3.8861
pos_10988	Spirolide B	metab_1084	-	HMDB0030492	694.462	pos	-	-	213.98	0.179891	-	-	-	170713-72-1	-	-	-	-	-	-	Organoheterocyclic compounds	Azepines	Not Available	3.3763	3.6061	3.6417	3.5812	3.361	3.4071	3.3284	3.3348	3.3425	3.3126	3.4826	3.3449
pos_11873	PE(18:1(11Z)/16:0)	metab_1128	-	HMDB0009022	740.519	pos	-	-	43.487	0.213282	-	-	-	-	-	-	-	-	-	-	Lipids and lipid-like molecules	Glycerophospholipids	Glycerophosphoethanolamines	4.0306	3.9716	4.2547	3.8666	4.0085	3.9786	3.9264	3.8516	3.8012	3.8802	3.8494	3.9191
pos_11969	PG(16:0/18:3(9Z,12Z,15Z))	metab_1135	-	LMGP04010973;HMDB0010577	745.505	pos	-	-	239.523	0.0774797	-	-	-	-	-	-	-	-	-	-	Lipids and lipid-like molecules	Glycerophospholipids	Glycerophosphoglycerols	2.9639	3.3375	3.2115	3.1239	3.1156	4.4899	3.772	4.478	4.2129	4.4688	4.3088	4.5236
pos_12076	PE(22:6(4Z,7Z,10Z,13Z,16Z,19Z)/15:0)	metab_1137	-	LMGP02011136;HMDB0009681	750.503	pos	-	-	125.344	0.219928	-	-	-	-	-	-	-	-	-	-	Lipids and lipid-like molecules	Glycerophospholipids	Glycerophosphoethanolamines	4.2195	4.4727	4.3282	4.6831	4.4503	4.2491	4.207	4.0099	4.2226	3.9976	3.9674	4.2415
pos_13486	PG(18:3(9Z,12Z,15Z)/22:5(4Z,7Z,10Z,13Z,16Z))	metab_1219	-	HMDB0010687	820.049	pos	-	-	338.638	0.121773	-	-	-	-	-	-	-	-	-	-	Lipids and lipid-like molecules	Glycerophospholipids	Glycerophosphoglycerols	3.2119	3.2962	3.2891	3.2796	3.3306	3.1708	3.1885	2.8844	3.1175	3.0147	3.1327	3.2804
pos_15743	TG(18:0/o-18:0/22:5(7Z,10Z,13Z,16Z,19Z))	metab_1311	-	HMDB0045475	924.537	pos	-	-	209.426	0.274494	-	-	-	-	-	-	-	-	-	-	Lipids and lipid-like molecules	Glycerolipids	Triradylcglycerols	2.9946	2.919	3.6037	3.428	3.4834	2.5775	2.6389	3.2334	2.7386	2.7698	3.3452	2.6918
neg_496	Indole	metab_1476	C00463;C19907	HMDB0000738	116.05	neg	-	-	105.745	0.115506	-	-	-	120-72-9	-	-	map01100;map00400;map00380;map04974	Metabolic pathways; Phenylalanine, tyrosine and tryptophan biosynthesis; Tryptophan metabolism; Protein digestion and absorption	Metabolism;Metabolism;Metabolism;Organismal Systems	Global and overview maps;Amino acid metabolism;Amino acid metabolism;Digestive system	Organoheterocyclic compounds	Indoles and derivatives	Indoles	4.6496	4.8368	4.8658	4.3189	4.5888	4.3584	3.8243	4.6149	4.3776	4.3896	4.2962	4.281
neg_568	Hydroxypropanedioic acid	metab_1485	C02287	HMDB0035227	119.062	neg	-	-	23.3435	0.0472633	-	-	-	80-69-3	-	-	-	-	-	-	Organic acids and derivatives	Carboxylic acids and derivatives	Dicarboxylic acids and derivatives	5.5849	5.8415	5.716	5.9166	5.7478	5.5085	5.571	5.7594	5.4874	5.7002	5.4115	5.6535
neg_764	Pterolactam	metab_1499	-	HMDB0034208	131.082	neg	-	-	372.625	0.0366573	-	-	-	38072-88-7	-	-	-	-	-	-	Organoheterocyclic compounds	Pyrrolidines	Pyrrolidones	4.9603	4.9285	4.9655	5.0609	5.1402	4.8172	4.9929	4.9304	4.8646	4.9461	4.9038	4.8262
neg_923	1-(Hydroxymethyl)-5,5-dimethyl-2,4-imidazolidinedione	metab_1514	-	HMDB0031670	139.05	neg	-	-	293.048	0.08213	-	-	-	116-25-6	-	-	-	-	-	-	Organoheterocyclic compounds	Azolidines	Imidazolidines	4.3522	4.0801	3.8766	4.2705	4.0185	4.5493	4.0965	4.5811	4.3571	4.4316	4.4969	4.8355
neg_2293	L-Homocysteic acid	metab_1664	C16511	HMDB0002205	199.029	neg	-	-	23.259	0.141138	-	-	-	14857-77-3	-	-	map04080	Neuroactive ligand-receptor interaction	Environmental Information Processing	Signaling molecules and interaction	Organic acids and derivatives	Carboxylic acids and derivatives	Amino acids, peptides, and analogues	6.0964	6.5616	6.4376	6.482	6.3642	6.0669	6.1257	6.3826	6.117	6.3191	5.939	6.239
neg_2579	Mukonal	metab_1695	-	HMDB0030216	210.052	neg	-	-	105.705	0.0809795	-	-	-	20323-67-5	-	-	-	-	-	-	Organoheterocyclic compounds	Indoles and derivatives	Carbazoles	4.7319	4.4643	4.4026	4.2383	4.3085	4.0042	3.6913	4.3592	4.4795	3.9645	4.142	4.1415
neg_3449	Pheniramine	metab_1773	-	HMDB0015557	239.163	neg	-	-	103.874	0.142859	-	-	-	86-21-5	-	-	-	-	-	-	Organoheterocyclic compounds	Pyridines and derivatives	Pheniramines	4.8761	4.9006	4.9114	4.9419	4.7929	4.7299	4.6868	4.753	4.8151	4.7979	4.6916	4.7289
neg_3463	Indole-3-carboxilic acid-O-sulphate	metab_1775	-	HMDB0060002	239.996	neg	-	-	40.7315	0.0529397	-	-	-	-	-	-	-	-	-	-	Organoheterocyclic compounds	Indoles and derivatives	Indolecarboxylic acids and derivatives	5.2082	5.1637	5.374	5.3688	5.27	4.4824	4.8776	4.4254	5.1478	5.3173	4.7458	5.0115
neg_3546	Maculine	metab_1787	C10714	-	242.04	neg	-	-	25.635	0.117925	-	-	-	-	-	-	-	-	-	-	-	-	-	4.31	4.9895	5.5306	4.8651	5.3946	4.3848	4.2399	4.1159	4.3263	4.7193	4.5941	4.6276
neg_5336	Amlexanox	metab_1930	-	HMDB0015160	297.096	neg	-	-	196.188	0.0328984	-	-	-	68302-57-8	-	-	-	-	-	-	Organoheterocyclic compounds	Benzopyrans	1-benzopyrans	4.277	4.3416	4.5368	4.7432	4.4987	4.2444	4.3742	4.1871	4.077	4.3212	4.1863	4.3305
neg_5645	Histidinyl-Hydroxyproline	metab_1952	-	HMDB0028886	305.068	neg	-	-	42.42	0.0761312	-	-	-	-	-	-	-	-	-	-	Organic acids and derivatives	Carboxylic acids and derivatives	Amino acids, peptides, and analogues	5.4231	5.0659	5.4707	5.1818	5.1512	4.7402	5.011	4.8682	4.8074	4.7745	5.0543	4.913
neg_5995	Melilotocarpan D	metab_1983	-	HMDB0033692;LMPK12070084	315.088	neg	-	-	66.945	0.0340602	-	-	-	83013-81-4	-	-	-	-	-	-	Phenylpropanoids and polyketides	Isoflavonoids	Furanoisoflavonoids	4.4978	4.6552	4.7824	4.7772	4.5433	4.1503	4.6441	4.2364	4.3625	4.5486	4.6358	4.3605
neg_6623	Benzyl glycinate 4-methylbenzenesulfonate salt	metab_2034	-	-	336.105	neg	-	-	105.681	0.131124	-	-	-	-	-	-	-	-	-	-	-	-	-	4.3229	4.4979	4.5752	4.0199	3.95	3.5226	3.376	3.8344	4.056	3.9275	4.0435	3.6982
neg_7437	N-[2-(4-Chloro-phenyl)-acetyl]-N'-(4,7-dimethyl-quizolin-2-yl)-guanidine	metab_2109	-	-	366.116	neg	-	-	105.58	0.0689799	-	-	-	-	-	-	-	-	-	-	-	-	-	4.8417	4.9761	5.0224	4.4301	4.4276	4.119	3.749	4.4571	4.6069	4.4059	4.4896	4.2217
neg_8124	1,3,8-Trihydroxy-4-methyl-2,7-diprenylxanthone	metab_2168	-	HMDB0037298	393.172	neg	-	-	38.499	0.138946	-	-	-	-	-	-	-	-	-	-	Organoheterocyclic compounds	Benzopyrans	1-benzopyrans	3.9773	3.7459	3.8287	3.9091	3.8804	3.6597	3.6918	3.8082	3.7487	3.64	3.4128	3.6697
neg_8260	Zuclopenthixol	metab_2177	-	HMDB0015561	399.128	neg	-	-	105.602	0.099553	-	-	-	53772-83-1	-	-	-	-	-	-	Organoheterocyclic compounds	Benzothiopyrans	1-benzothiopyrans	4.2271	4.2141	4.1333	3.5197	3.6951	3.4755	3.3221	3.7629	3.7722	3.4145	3.3613	3.3395
neg_8594	Imazosulfuron	metab_2209	C18443	-	411.037	neg	-	-	105.399	0.0287768	-	-	-	-	-	-	-	-	-	-	-	-	-	3.8153	3.7496	3.7977	3.4932	3.5441	3.3201	3.3292	3.5532	3.5635	3.4221	3.366	3.3433
neg_8743	5a-Cholestane-3a,7a,12a,25-tetrol	metab_2223	-	HMDB0000520	417.333	neg	-	-	47.317	0.0961987	-	-	-	60257-29-6	-	-	-	-	-	-	Lipids and lipid-like molecules	Glycerophospholipids	Glycerophosphoethanolamines	4.3887	4.1307	4.495	4.2562	4.7228	4.9109	4.7896	5.4536	5.3486	4.9538	4.5817	4.796
neg_8779	Flurbiprofen glucuronide	metab_2227	-	HMDB0060918	419.13	neg	-	-	195.555	0.145813	-	-	-	-	-	-	-	-	-	-	Organic oxygen compounds	Organooxygen compounds	Carbohydrates and carbohydrate conjugates	3.7218	3.6901	3.779	3.6137	3.8754	3.4923	3.635	3.6557	3.4902	3.6329	3.4805	3.7375
neg_9005	3a,7a-Dihydroxycholanoic acid	metab_2240	-	HMDB0000384	427.258	neg	-	-	159.403	0.0847705	-	-	-	30634-99-2	-	-	-	-	-	-	Lipids and lipid-like molecules	Steroids and steroid derivatives	Bile acids, alcohols and derivatives	5.0832	5.3297	5.3534	5.0361	5.308	4.4207	4.7652	5.1419	5.14	4.8344	4.7333	4.489
neg_9070	Oxynarcotine	metab_2248	-	HMDB0030247	430.158	neg	-	-	104.209	0.239023	-	-	-	483-89-6	-	-	-	-	-	-	Alkaloids and derivatives	Aporphines	Not Available	3.9105	4.148	4.3202	3.8525	3.9856	3.7107	3.3531	3.7957	3.722	3.5502	3.93	3.7347
neg_9157	Glutathionylspermidine	metab_2255	C05730	-	433.232	neg	-	-	234.522	0.0704733	-	-	-	-	-	-	map01100;map00480	Metabolic pathways; Glutathione metabolism	Metabolism;Metabolism	Global and overview maps;Metabolism of other amino acids	-	-	-	4.9206	4.7925	5.0091	5.1181	5.0228	4.72	4.8815	4.8395	4.6785	4.8457	4.8046	4.7527
neg_9204	Sertaconazole	metab_2264	-	HMDB0015284	434.997	neg	-	-	23.091	0.136716	-	-	-	99592-32-2	-	-	-	-	-	-	Organoheterocyclic compounds	Benzothiophenes	1-benzothiophenes	3.6103	3.3716	3.8267	4.0247	3.6793	4.0213	3.9927	3.9722	4.0622	3.7305	3.8286	4.046
neg_9438	6-Mercaptopurine ribonucleoside 5'-diphosphate	metab_2282	C16616	HMDB0060660	443.252	neg	-	-	212.054	0.205984	-	-	-	-	-	-	map00983	Drug metabolism - other enzymes	Metabolism	Xenobiotics biodegradation and metabolism	Nucleosides, nucleotides, and analogues	Purine nucleotides	Purine ribonucleotides	4.0369	3.9802	4.5872	4.6108	4.5487	3.3837	3.7379	4.3951	3.8878	3.7224	4.3089	3.6608
neg_9480	5'-O-Methylmelledonal	metab_2285	-	HMDB0035859	445.186	neg	-	-	75.476	0.0470268	-	-	-	-	-	-	-	-	-	-	Lipids and lipid-like molecules	Prenol lipids	Sesquiterpenoids	4.5726	4.8543	4.4399	4.9332	5.3753	5.0326	5.1405	5.1537	5.5401	5.2707	5.7965	5.1978
neg_9779	Lucidenic acid A	metab_2310	-	HMDB0037611	457.26	neg	-	-	104.546	0.056143	-	-	-	95311-94-7	-	-	-	-	-	-	Lipids and lipid-like molecules	Prenol lipids	Sesquiterpenoids	4.001	4.2656	4.4058	4.1149	4.048	3.973	4.0528	4.0378	3.9782	3.9863	3.8531	3.8563
neg_10064	2-(2-Methylbutanoyl)-9-(3-methyl-2E-pentenoyl)-2b,9a-dihydroxy-4Z,10(14)-oplopadien-3-one	metab_2338	-	HMDB0040994	470.271	neg	-	-	212.185	0.197048	-	-	-	80514-14-3	-	-	-	-	-	-	Lipids and lipid-like molecules	Prenol lipids	Sesquiterpenoids	3.9319	3.859	4.4674	4.512	4.5057	3.1932	3.5961	4.2352	3.7045	3.6682	4.2495	3.537
neg_10235	Azlocillin	metab_2353	C06839	HMDB0015194	477.142	neg	-	-	283.25	0.227993	-	-	-	37091-66-0	-	-	-	-	-	-	Organic acids and derivatives	Carboxylic acids and derivatives	Amino acids, peptides, and analogues	3.7366	3.5586	3.7467	3.8552	3.5905	3.3028	3.7469	3.5658	3.3878	3.4968	3.4754	3.5095
neg_10395	Kanamycin	metab_2368	C01822;C00304	HMDB0015303	483.237	neg	-	-	32.969	0.0922001	-	-	-	8063-07-8	-;Antibiotics	-;Aminoglycosides	map00524	Neomycin, kanamycin and gentamicin biosynthesis	Metabolism	Biosynthesis of other secondary metabolites	Organic oxygen compounds	Organooxygen compounds	Carbohydrates and carbohydrate conjugates	4.0971	4.095	4.6303	4.1882	4.2584	4.6564	4.5249	4.2615	4.5929	4.4742	4.4939	4.54
neg_10452	3,7-Dihydroxy-25-methoxycucurbita-5,23-dien-19-al	metab_2373	-	HMDB0039362	485.358	neg	-	-	47.7815	0.186685	-	-	-	-	-	-	-	-	-	-	Lipids and lipid-like molecules	Steroids and steroid derivatives	Cucurbitacins	4.843	4.8128	4.7931	4.924	4.6352	4.4267	4.8104	4.5977	4.6366	4.5471	4.4983	4.3705
neg_10510	10-Deoxymethymycin	metab_2381	C11994	LMPK04000035	488.273	neg	-	-	113.78	0.07149	-	-	-	-	-	-	map01100	Metabolic pathways	Metabolism	Global and overview maps	-	-	-	4.8128	4.7752	4.8708	4.7692	4.877	5.2405	4.9488	5.0413	5.0875	5.0672	4.7084	4.9436
neg_10880	Blumenol C O-[apiosyl-(1-&gt	metab_2416	-	-	503.263	neg	-	-	212.22	0.0391129	-	-	-	-	-	-	-	-	-	-	-	-	-	3.7539	3.5582	3.9271	4.013	4.0158	3.2012	3.5272	3.9212	3.5671	3.54	3.7975	3.3253
neg_11245	Molybdopterin	metab_2439	C05924	-	520.263	neg	-	-	224.496	0.116182	-	-	-	-	-	-	map01100;map04122;map00790	Metabolic pathways; Sulfur relay system; Folate biosynthesis	Metabolism;Genetic Information Processing;Metabolism	Global and overview maps;Folding, sorting and degradation;Metabolism of cofactors and vitamins	-	-	-	3.8609	3.9668	3.7902	3.5165	3.7563	4.3319	3.8948	3.939	4.028	3.9777	4.0526	4.0481
neg_11876	Cyclopassifloic acid E	metab_2497	-	HMDB0036298	551.354	neg	-	-	142.169	0.081333	-	-	-	301540-74-9	-	-	-	-	-	-	Lipids and lipid-like molecules	Steroids and steroid derivatives	Cycloartanols and derivatives	4.1545	3.9319	4.0048	4.2724	4.028	3.9094	3.9537	3.9177	3.8683	3.8311	3.964	3.8328
neg_12389	Anhydroamarouciaxanthin B	metab_2534	-	HMDB0036911	577.369	neg	-	-	140.191	0.100284	-	-	-	119286-10-1	-	-	-	-	-	-	Lipids and lipid-like molecules	Prenol lipids	Triterpenoids	3.88	3.4864	3.5513	3.6845	3.4328	3.2999	3.5204	3.3914	3.4772	3.3736	3.4079	3.2892
neg_13051	Lolitriol	metab_2596	C20548	-	618.336	neg	-	-	186.386	0.0270388	-	-	-	-	-	-	-	-	-	-	-	-	-	4.4225	4.2893	3.834	3.9085	4.792	5.1693	4.2497	4.9165	4.638	4.5676	4.5869	4.7403
neg_13215	CMP-N-glycoloylneuraminate	metab_2607	C03691	HMDB0012206	629.449	neg	-	-	41.574	0.143997	-	-	-	98300-80-2	-	-	map00520	Amino sugar and nucleotide sugar metabolism	Metabolism	Carbohydrate metabolism	Nucleosides, nucleotides, and analogues	Pyrimidine nucleotides	Pyrimidine ribonucleotides	4.4704	4.4565	4.5212	4.5115	4.5258	4.2842	4.3591	4.1814	4.3114	4.3451	4.5044	4.3782
neg_16192	TG(18:3(9Z,12Z,15Z)/20:0/o-18:0)	metab_2817	-	HMDB0055182	898.483	neg	-	-	117.733	0.281898	-	-	-	-	-	-	-	-	-	-	Lipids and lipid-like molecules	Glycerolipids	Triradylcglycerols	4.3663	4.3741	4.1257	4.0782	4.1959	4.4443	4.4606	4.5732	4.2789	4.2827	4.4478	4.3853
neg_16360	TG(20:0/18:3(9Z,12Z,15Z)/20:2n6)	metab_2825	-	HMDB0046088	922.484	neg	-	-	114.716	0.235305	-	-	-	-	-	-	-	-	-	-	Lipids and lipid-like molecules	Glycerolipids	Triradylcglycerols	4.0616	3.7492	3.7163	3.8575	3.867	4.1531	4.093	4.3389	4.0483	4.2329	3.819	4.1155

## Sheet: DM vs INS
ID	Metabolite	Metab ID	KEGG Compound ID	Library ID	M/Z	Mode	Adducts	Formula	Retention time	RSD	Fragmentation Score	Theoretical Fragmentation Score	Mass Error	CAS ID	KEGG Compound First Category	KEGG Compound Second Category	KEGG Pathway ID	KEGG Pathway Description	KEGG Pathway First Category	KEGG Pathway Second Category	HMDB Superclass	HMDB Class	HMDB Subclass	DM_1	DM_2	DM_3	DM_4	DM_5	INS_1	INS_2	INS_3	INS_4	INS_5	INS_6	INS_7
pos_179	Aniline	metab_13	C00292	HMDB0003012	94.0641	pos	-	-	270.065	0.0442739	-	-	-	62-53-3	-	-	-	-	-	-	Benzenoids	Benzene and substituted derivatives	Aniline and substituted anilines	4.2099	4.1178	4.2533	4.2493	4.3666	4.4981	4.514	4.29	4.5086	4.4619	4.507	4.5618
pos_763	1,2,3-Propanetricarboxylic acid	metab_91	C19806	HMDB0031193	141.017	pos	-	-	41.678	0.0119812	-	-	-	99-14-9	-	-	-	-	-	-	Organic acids and derivatives	Carboxylic acids and derivatives	Tricarboxylic acids and derivatives	3.6512	3.696	3.8529	3.925	3.6921	3.7004	3.8247	3.9535	4.0712	4.0433	4.1497	3.904
pos_1457	Epinephrine	metab_197	C00788	HMDB0000068	184.093	pos	-	-	336.137	0.161058	-	-	-	51-43-4	Hormones and transmitters;Hormones and transmitters	Other hormones;Neurotransmitters	map01100;map04261;map04080;map04024;map04923;map04924;map00350	Metabolic pathways; Adrenergic signaling in cardiomyocytes; Neuroactive ligand-receptor interaction; cAMP signaling pathway; Regulation of lipolysis in adipocytes; Renin secretion; Tyrosine metabolism	Metabolism;Organismal Systems;Environmental Information Processing;Environmental Information Processing;Organismal Systems;Organismal Systems;Metabolism	Global and overview maps;Circulatory system;Signaling molecules and interaction;Signal transduction;Endocrine system;Endocrine system;Amino acid metabolism	Benzenoids	Phenols	Benzenediols	5.0277	4.9172	4.8645	5.134	5.149	5.2256	5.1536	5.3264	5.3126	5.3003	5.1088	4.9886
pos_1499	Pseudoecgonine	metab_204	C12449	HMDB0006348	186.22	pos	-	-	140.044	0.02465	-	-	-	-	-	-	-	-	-	-	Alkaloids and derivatives	Tropane alkaloids	Not Available	4.1808	4.2461	4.406	4.9907	4.1952	4.181	4.056	3.907	3.9283	3.9522	4.0594	4.0396
pos_2051	L-beta-aspartyl-L-serine	metab_278	-	-	221.185	pos	-	-	256.268	0.0505817	-	-	-	-	-	-	-	-	-	-	-	-	-	5.7438	5.7635	5.8018	5.7377	5.8161	5.8038	5.9713	5.9333	6.0274	5.9019	5.8689	5.8573
pos_2120	2-Hydroxy-4,7-dimethoxy-2H-1,4-benzoxazin-3(4H)-one	metab_283	-	HMDB0037264	226.067	pos	-	-	144.164	0.0374821	-	-	-	149182-67-2	-	-	-	-	-	-	Organoheterocyclic compounds	Benzoxazines	Benzoxazinones	3.7183	3.7726	3.8735	3.9143	3.899	3.8959	3.86	4.0165	3.9054	4.0426	4.0315	4.0783
pos_2189	5-Guanidino-3-methyl-2-oxopentanoate	metab_289	C20234	-	229.118	pos	-	-	403.65	0.1486	-	-	-	-	-	-	-	-	-	-	-	-	-	4.9589	5.0105	5.0924	5.3885	5.163	5.4588	5.4292	5.4536	5.5944	5.4666	5.4295	5.4621
pos_2195	Isoleucyl-Proline	metab_291	-	-	229.154	pos	-	-	283.241	0.0708797	-	-	-	-	-	-	-	-	-	-	-	-	-	5.2976	5.437	5.3502	5.8477	5.7542	5.671	5.8583	5.7756	5.7188	6.0255	6.1159	5.8316
pos_2228	TES	metab_295	C05353	-	230.247	pos	-	-	51.883	0.203252	-	-	-	-	-	-	-	-	-	-	-	-	-	4.5675	4.6484	4.863	4.6786	4.6719	4.4316	4.5259	4.4802	4.4033	4.5678	4.619	4.693
pos_2366	Oxamyl	metab_313	C18419	-	237.101	pos	-	-	23.6965	0.134252	-	-	-	-	-	-	-	-	-	-	-	-	-	4.2454	4.4549	4.479	4.2315	4.3421	4.6378	4.6318	4.5589	4.6681	4.6582	4.891	4.7025
pos_2449	L-Gizzerosine	metab_321	-	HMDB0039160	241.154	pos	-	-	355.412	0.0616348	-	-	-	89238-78-8	-	-	-	-	-	-	Organic acids and derivatives	Carboxylic acids and derivatives	Amino acids, peptides, and analogues	4.4907	4.5706	4.5883	4.7701	4.6384	4.6847	4.7216	4.7913	4.7675	4.9085	4.9192	4.781
pos_2451	Mepanipyrim	metab_322	C10919	-	241.154	pos	-	-	121.771	0.0442896	-	-	-	-	-	-	-	-	-	-	-	-	-	4.5247	4.631	4.6365	4.6064	4.4592	4.7843	4.6756	4.7474	4.9568	4.7478	4.7024	4.7045
pos_2472	5-Methyldeoxycytidine	metab_324	C03592	HMDB0002224	242.112	pos	-	-	185.402	0.0789246	-	-	-	838-07-3	-	-	-	-	-	-	Nucleosides, nucleotides, and analogues	Pyrimidine nucleosides	Pyrimidine 2'-deoxyribonucleosides	4.5007	4.4033	4.5131	4.5229	4.3536	4.6126	4.5171	4.5466	4.5638	4.6034	4.7158	4.5821
pos_2534	Adrenochrome o-semiquinone	metab_332	-	HMDB0012883	244.19	pos	-	-	34.058	0.123071	-	-	-	-	-	-	-	-	-	-	Organoheterocyclic compounds	Indoles and derivatives	Not Available	4.9362	5.1642	4.8707	5.4224	5.4116	5.0633	4.7447	4.7431	5.2866	4.3617	4.6805	4.3976
pos_2637	Pyridoxal 5'-phosphate	metab_351	C00018	HMDB0001491	248.149	pos	-	-	302.078	0.0428738	-	-	-	54-47-7	Vitamins and Cofactors	Cofactors	map00730;map01100;map00750;map04977	Thiamine metabolism; Metabolic pathways; Vitamin B6 metabolism; Vitamin digestion and absorption	Metabolism;Metabolism;Metabolism;Organismal Systems	Metabolism of cofactors and vitamins;Global and overview maps;Metabolism of cofactors and vitamins;Digestive system	Organoheterocyclic compounds	Pyridines and derivatives	Pyridine carboxaldehydes	5.4254	5.6434	5.6677	5.3678	5.2162	4.8041	4.9107	5.266	5.4694	5.0494	5.0002	5.0525
pos_2661	Pindolol	metab_355	C07445	HMDB0015095	249.154	pos	-	-	328.824	0.149655	-	-	-	13523-86-9	-	-	-	-	-	-	Organoheterocyclic compounds	Indoles and derivatives	Indoles	3.8897	4.0423	3.967	4.1462	4.0865	4.0885	4.2333	4.232	4.1936	4.2058	4.1591	4.1694
pos_2683	(S)-Spirobrassinin	metab_359	-	HMDB0035974	251.035	pos	-	-	278.171	0.0691663	-	-	-	-	-	-	-	-	-	-	Organoheterocyclic compounds	Indoles and derivatives	Indolines	3.5491	3.9574	3.721	3.7495	4.0053	4.1702	4.3398	3.9216	4.2525	4.317	4.0271	3.9536
pos_2921	10-Hydroxy-3-methoxy-1,3,5,7-cadinatetraen-9-one	metab_382	C09695	HMDB0036456	261.143	pos	-	-	393.507	0.116002	-	-	-	72843-51-7	-	-	-	-	-	-	Lipids and lipid-like molecules	Prenol lipids	Sesquiterpenoids	4.2175	4.1262	4.2532	4.3808	4.2203	4.4267	4.5495	4.5892	4.4247	4.3852	4.3315	4.3949
pos_3086	Dimethylallylpyrophosphate	metab_403	C00235	HMDB0001120	268.998	pos	-	-	338.676	0.0607171	-	-	-	358-72-5	-	-	map01100;map00900	Metabolic pathways; Terpenoid backbone biosynthesis	Metabolism;Metabolism	Global and overview maps;Metabolism of terpenoids and polyketides	Lipids and lipid-like molecules	Prenol lipids	Isoprenoid phosphates	6.8338	6.8391	6.8917	6.8552	6.8637	6.9464	6.9414	7.0035	6.9437	7.0134	6.9221	6.8736
pos_3089	Thiaburimamide	metab_404	C11800	-	269.03	pos	-	-	222.282	0.252985	-	-	-	-	-	-	-	-	-	-	-	-	-	3.7883	3.8348	3.8075	3.3031	3.2737	3.2516	3.2388	3.4441	3.35	3.2489	3.2933	3.3612
pos_3478	Faropenem	metab_443	C13310	HMDB0041892	286.309	pos	-	-	58.701	0.0902558	-	-	-	106560-14-9	-	-	-	-	-	-	Organic acids and derivatives	Carboxylic acids and derivatives	Amino acids, peptides, and analogues	4.0707	4.1322	4.1155	3.9889	3.9816	3.909	3.9196	3.8777	3.8561	3.9024	4.0716	3.9248
pos_3600	Margaroylglycine	metab_459	-	HMDB0013246	292.262	pos	-	-	40.8545	0.110922	-	-	-	-	-	-	-	-	-	-	Organic acids and derivatives	Carboxylic acids and derivatives	Amino acids, peptides, and analogues	4.1096	4.7214	4.7124	4.6816	4.7683	4.2215	4.4937	4.3549	4.4871	4.2438	4.1566	4.1269
pos_3934	Albendazole	metab_500	C01779	HMDB0014659	310.055	pos	-	-	338.057	0.125246	-	-	-	54965-21-8	-	-	-	-	-	-	Organoheterocyclic compounds	Benzimidazoles	2-benzimidazolylcarbamic acid esters	4.3689	4.5181	4.3896	4.4821	4.0964	3.8037	3.7541	4.4131	4.0963	3.8204	4.2654	4.1609
pos_4046	Alizapride	metab_515	-	HMDB0015494	316.174	pos	-	-	356.414	0.0426828	-	-	-	59338-93-1	-	-	-	-	-	-	Organoheterocyclic compounds	Benzotriazoles	Not Available	3.5293	3.831	3.6918	3.9868	3.7246	3.8336	3.9162	3.9904	4.0518	3.9797	4.0597	3.8126
pos_4080	N-(1-Deoxy-1-fructosyl)valine	metab_521	-	HMDB0037844	318.094	pos	-	-	314.684	0.0870837	-	-	-	-	-	-	-	-	-	-	Organic acids and derivatives	Carboxylic acids and derivatives	Amino acids, peptides, and analogues	4.8281	4.6998	4.7787	4.725	3.8945	3.7605	3.5465	4.5982	3.8744	3.6231	4.3184	4.0303
pos_4093	Lettowianthine	metab_525	-	HMDB0034923	318.299	pos	-	-	68.4775	0.0929595	-	-	-	-	-	-	-	-	-	-	Alkaloids and derivatives	Aporphines	Not Available	5.8055	5.7014	5.6493	5.703	5.5934	5.4899	5.6263	5.515	5.3749	5.593	5.6929	5.6258
pos_4489	L-gamma-Glutamyl-S-allylthio-L-cysteine	metab_572	-	HMDB0038515	340.1	pos	-	-	25.078	0.0503503	-	-	-	-	-	-	-	-	-	-	Organic acids and derivatives	Carboxylic acids and derivatives	Amino acids, peptides, and analogues	4.0355	3.9018	4.0826	3.8487	3.7638	3.859	3.6157	3.9755	3.5407	3.644	3.476	3.4231
pos_4621	2-Descarboxy-betanidin	metab_591	C17757	-	346.331	pos	-	-	51.259	0.18964	-	-	-	-	-	-	-	-	-	-	-	-	-	4.8645	4.7536	4.7575	4.7805	4.6755	4.4046	4.6699	4.4833	4.4388	4.3606	4.6618	4.5966
pos_4688	Taxiphyllin	metab_597	C01855	HMDB0030704	350.065	pos	-	-	307.363	0.0294326	-	-	-	21401-21-8	-	-	-	-	-	-	Organic oxygen compounds	Organooxygen compounds	Carbohydrates and carbohydrate conjugates	4.3005	4.1696	4.2031	4.3846	3.7557	3.4513	3.3356	4.2863	3.632	3.4648	3.9493	3.7959
pos_4691	N-(1-Deoxy-1-fructosyl)phenylalanine	metab_598	-	HMDB0037846	350.12	pos	-	-	281.19	0.256543	-	-	-	87251-83-0	-	-	-	-	-	-	Organic acids and derivatives	Carboxylic acids and derivatives	Amino acids, peptides, and analogues	4.6544	4.9439	4.9336	5.002	4.4508	3.9092	4.158	4.7231	4.3908	4.1077	4.7842	4.4626
pos_4795	2-O-p-Coumaroylhydroxycitric acid	metab_609	-	HMDB0040570	355.262	pos	-	-	209.801	0.0549409	-	-	-	62345-85-1	-	-	-	-	-	-	Phenylpropanoids and polyketides	Cinnamic acids and derivatives	Hydroxycinnamic acids and derivatives	4.7411	4.5827	5.1172	5.0102	4.989	4.0111	4.446	4.4331	4.5518	3.812	3.8512	4.1217
pos_4836	Acaciabiuronic acid	metab_615	-	HMDB0029938	357.277	pos	-	-	157.19	0.0546327	-	-	-	7264-19-9	-	-	-	-	-	-	Organic oxygen compounds	Organooxygen compounds	Carbohydrates and carbohydrate conjugates	4.0879	4.4711	4.5529	3.9833	4.6447	4.2335	3.7312	3.9427	4.1263	3.7222	4.1093	3.7262
pos_4871	Dulciol D	metab_618	-	HMDB0029791	359.09	pos	-	-	354.687	0.0678627	-	-	-	175617-26-2	-	-	-	-	-	-	Organoheterocyclic compounds	Benzopyrans	1-benzopyrans	3.7467	3.8242	3.7646	3.8401	4.151	4.0058	4.1825	4.0155	4.2717	4.1627	3.92	4.1442
pos_5064	3, 5-Tetradecadiencarnitine	metab_637	-	HMDB0013331	368.278	pos	-	-	162.54	0.0398831	-	-	-	-	-	-	-	-	-	-	-	-	-	4.1347	4.1635	4.2389	4.1492	4.2705	3.8936	3.9809	4.1079	4.2934	4.0479	4.012	4.0538
pos_5091	20-Tetracosene-1,18-diol	metab_640	-	HMDB0040887	369.369	pos	-	-	25.054	0.0888876	-	-	-	151454-15-8	-	-	-	-	-	-	Lipids and lipid-like molecules	Fatty Acyls	Fatty alcohols	4.328	4.4224	4.5026	4.0209	3.8628	3.9885	3.9818	3.9298	3.9013	3.8154	4.1074	3.8474
pos_5156	4-(N-Maleimido)benzyltrimethylammonium iodide	metab_648	C13677	-	373.034	pos	-	-	59.321	0.0784774	-	-	-	-	-	-	-	-	-	-	-	-	-	3.6103	3.2561	3.4267	3.8348	3.6738	3.9276	3.7813	4.002	3.7444	3.9688	3.6119	3.848
pos_5215	Haloxyfop methyl	metab_655	C11031	-	376.05	pos	-	-	277.934	0.0475649	-	-	-	-	-	-	-	-	-	-	-	-	-	3.0676	3.574	3.3227	3.4478	3.5911	3.7396	3.9329	3.5106	3.8798	3.9134	3.6117	3.6024
pos_5381	3-Hydroxy-5, 8-tetradecadiencarnitine	metab_668	-	HMDB0013332	384.273	pos	-	-	186.047	0.0356621	-	-	-	-	-	-	-	-	-	-	Lipids and lipid-like molecules	Fatty Acyls	Fatty acid esters	3.6525	3.7351	3.7824	3.7095	3.7488	3.3947	3.3128	3.6761	3.729	3.4681	3.437	3.4955
pos_5464	2-Hydroxymyristoylcarnitine	metab_679	-	HMDB0013166;LMFA07070033	388.304	pos	-	-	183.924	0.0239883	-	-	-	-	-	-	-	-	-	-	Lipids and lipid-like molecules	Fatty Acyls	Fatty acid esters	3.8305	3.8676	3.9583	3.8509	3.9422	3.548	3.5647	3.8395	4.0045	3.7389	3.6778	3.5646
pos_5906	3-Hydroxyhexadecadienoylcarnitine	metab_711	-	HMDB0013335	412.304	pos	-	-	181.291	0.117861	-	-	-	-	-	-	-	-	-	-	Lipids and lipid-like molecules	Fatty Acyls	Fatty acid esters	3.5128	3.5471	3.804	3.7235	3.6769	3.3202	3.3469	3.4531	3.6031	3.4749	3.3906	3.4928
pos_5950	3-Hydroxy-9-hexadecenoylcarnitine	metab_716	-	HMDB0013333	414.319	pos	-	-	179.624	0.112896	-	-	-	-	-	-	-	-	-	-	-	-	-	3.9151	3.7258	4.1188	3.957	4.0947	3.4519	3.3426	3.8167	4.0816	3.5332	3.5788	3.812
pos_5952	Heptadecanoyl carnitine	metab_717	-	HMDB0006210;LMFA07070067	414.356	pos	-	-	153.699	0.0254795	-	-	-	106182-29-0	-	-	-	-	-	-	Lipids and lipid-like molecules	Fatty Acyls	Fatty acid esters	4.0138	4.0979	4.3339	3.912	3.9805	3.7742	3.7445	3.7386	4.0574	3.8296	3.8335	3.7927
pos_6276	Butoconazole	metab_738	C08065	HMDB0014777	433.004	pos	-	-	338.661	0.0667681	-	-	-	64872-77-1	-	-	-	-	-	-	Benzenoids	Benzene and substituted derivatives	Phenylbutylamines	6.1346	6.1695	6.1851	6.1821	6.1451	6.2411	6.2604	6.3113	6.2752	6.3362	6.2537	6.1669
pos_6391	PE(P-16:0e/0:0)	metab_745	-	HMDB0011152	438.296	pos	-	-	43.816	0.0520187	-	-	-	-	-	-	-	-	-	-	Lipids and lipid-like molecules	Glycerophospholipids	Glycerophosphoethanolamines	4.3719	4.357	4.405	4.2379	4.1396	4.1642	4.0322	4.1222	4.0347	4.0882	4.2051	4.1626
pos_6442	7-Methylguanosine 5'-diphosphate	metab_752	C20183	HMDB0059613	441.238	pos	-	-	229.521	0.037042	-	-	-	-	-	-	-	-	-	-	Nucleosides, nucleotides, and analogues	Purine nucleotides	Purine ribonucleotides	3.9948	4.0235	4.0441	4.0769	4.1263	3.901	3.8956	3.938	3.9018	3.8616	3.8777	3.8756
pos_6681	Bispyribac-sodium	metab_777	C18453	-	454.351	pos	-	-	209.814	0.175625	-	-	-	-	-	-	-	-	-	-	-	-	-	4.5137	4.4114	5.0189	4.8801	4.9293	3.1749	3.9702	3.7281	4.2617	3.285	3.3332	3.6044
pos_6808	Bromofenoxim	metab_790	C19069	-	462.029	pos	-	-	338.627	0.10898	-	-	-	-	-	-	-	-	-	-	-	-	-	3.545	3.5824	3.6474	3.7041	3.7356	3.7365	3.8424	3.8877	3.7731	3.7045	3.8225	3.7022
pos_6926	Vitamin K1 2,3-epoxide	metab_802	C05849	HMDB0002972	467.346	pos	-	-	209.746	0.0797321	-	-	-	25486-55-9	-	-	map01100;map00130	Metabolic pathways; Ubiquinone and other terpenoid-quinone biosynthesis	Metabolism;Metabolism	Global and overview maps;Metabolism of cofactors and vitamins	Lipids and lipid-like molecules	Prenol lipids	Quinone and hydroquinone lipids	4.3349	4.2517	4.7582	4.5965	4.6096	3.0866	3.8767	3.6791	4.1682	3.0997	3.2774	3.4956
pos_6954	Copal-8-ol diphosphate	metab_808	C20270	-	469.202	pos	-	-	194.87	0.0336114	-	-	-	-	-	-	-	-	-	-	-	-	-	3.6169	3.1441	3.5181	3.6189	3.5483	3.6901	3.6434	3.5605	3.6677	3.7455	3.7528	3.6629
pos_6965	Silymonin	metab_810	-	LMPK12140696;HMDB0030585	469.447	pos	-	-	338.676	0.0886615	-	-	-	70815-31-5	-	-	-	-	-	-	Organoheterocyclic compounds	Benzodioxoles	Not Available	4.3083	4.3192	4.3746	4.2281	4.0617	4.4025	4.3776	4.4337	4.3316	4.4311	4.3475	4.3261
pos_7026	Atractyloside B	metab_814	C17859	-	473.238	pos	-	-	147.329	0.12243	-	-	-	-	-	-	-	-	-	-	-	-	-	3.8517	4.0976	3.969	3.8957	3.8459	3.5816	3.7906	3.7367	3.9749	3.8185	3.3563	3.6279
pos_7189	Ceramide (d18:1/12:0)	metab_827	C00195	HMDB0004947	482.798	pos	-	-	142.525	0.052479	-	-	-	-	-	-	map01100;map05140;map00600;map04722;map04920;map04071;map04217;map04933;map04931	Metabolic pathways; Leishmaniasis; Sphingolipid metabolism; Neurotrophin signaling pathway; Adipocytokine signaling pathway; Sphingolipid signaling pathway; Necroptosis; AGE-RAGE signaling pathway in diabetic complications; Insulin resistance	Metabolism;Human Diseases;Metabolism;Organismal Systems;Organismal Systems;Environmental Information Processing;Cellular Processes;Human Diseases;Human Diseases	Global and overview maps;Infectious disease: parasitic;Lipid metabolism;Nervous system;Endocrine system;Signal transduction;Cell growth and death;Endocrine and metabolic disease;Endocrine and metabolic disease	Lipids and lipid-like molecules	Sphingolipids	Ceramides	3.8085	3.9158	3.9168	3.8926	3.8265	4.0896	4.0704	4.0053	4.1594	4.0027	4.0132	3.9651
pos_7194	3'-Hydroxy-T2 Toxin	metab_829	-	HMDB0036601	483.218	pos	-	-	185.694	0.197307	-	-	-	84474-35-1	-	-	-	-	-	-	Lipids and lipid-like molecules	Prenol lipids	Sesquiterpenoids	4.2819	4.1276	4.2019	4.3381	4.0733	4.539	4.3611	4.2695	4.4219	4.3713	4.747	4.447
pos_7274	Eudesobovatol A	metab_833	C10562	-	487.325	pos	-	-	194.25	0.0321241	-	-	-	-	-	-	-	-	-	-	-	-	-	4.2556	4.5105	4.4526	4.5917	4.3347	4.6743	4.6763	4.6358	4.6638	4.4153	4.7477	4.7116
pos_7302	Dolichyl b-D-glucosyl phosphate	metab_836	C01246	HMDB0001054	489.232	pos	-	-	209.766	0.228347	-	-	-	220496-27-5	-	-	map00510;map01100	N-Glycan biosynthesis; Metabolic pathways	Metabolism;Metabolism	Glycan biosynthesis and metabolism;Global and overview maps	Lipids and lipid-like molecules	Prenol lipids	Sesquiterpenoids	3.2045	3.3674	3.5806	3.5919	3.6523	2.8246	3.3412	3.0168	3.3918	2.9799	2.958	3.3073
pos_7390	LysoPC(16:1(9Z))	metab_841	C04230	-	494.321	pos	-	-	111.268	0.0388914	-	-	-	-	Lipids	Phospholipids	map00564;map05231	Glycerophospholipid metabolism; Choline metabolism in cancer	Metabolism;Human Diseases	Lipid metabolism;Cancer: overview	-	-	-	4.6131	4.8267	4.9458	4.5884	4.5852	4.5161	4.5586	4.493	4.4233	4.7307	4.5383	4.3354
pos_7485	Conivaptan	metab_849	-	HMDB0015010	499.193	pos	-	-	194.873	0.0371847	-	-	-	210101-16-9	-	-	-	-	-	-	Benzenoids	Benzene and substituted derivatives	Anilides	4.1759	4.1636	4.1312	4.2678	4.2461	4.2614	4.2981	4.3281	4.2808	4.3354	4.3448	4.2536
pos_7742	Propylene glycol mono- and diesters of fats and fatty acids	metab_873	-	HMDB0032494;LMFA07011007	511.828	pos	-	-	159.312	0.0450564	-	-	-	107-98-2	-	-	-	-	-	-	Lipids and lipid-like molecules	Fatty Acyls	Fatty acid esters	3.9215	4.019	4.0073	3.9818	3.9255	4.0826	3.9959	4.1051	4.2477	4.0451	4.0734	4.0378
pos_7748	Piperenol C	metab_874	-	HMDB0041536	512.163	pos	-	-	293.584	0.178593	-	-	-	174819-31-9	-	-	-	-	-	-	Organic acids and derivatives	Carboxylic acids and derivatives	Pentacarboxylic acids and derivatives	3.6915	3.5062	3.4901	3.6277	3.063	2.8	2.8877	3.4524	2.9219	2.7822	3.1575	3.1289
pos_7814	Novaluron	metab_883	C18875	-	515.006	pos	-	-	338.661	0.0819704	-	-	-	-	-	-	-	-	-	-	-	-	-	6.0638	6.1099	6.1338	6.1103	6.0866	6.1982	6.1879	6.2622	6.2174	6.2805	6.2067	6.0787
pos_8185	Grepafloxacin glucuronide	metab_913	C11597	-	536.19	pos	-	-	26.506	0.213031	-	-	-	-	-	-	-	-	-	-	-	-	-	4.7179	4.6922	4.7239	4.6683	4.7074	4.8142	4.8155	4.829	4.7843	4.8446	4.733	4.7318
pos_8527	3-D-Glucuronosyl-N2,6-disulfo-beta-D-glucosamine	metab_936	C04674	-	554.39	pos	-	-	177.584	0.261269	-	-	-	-	-	-	-	-	-	-	-	-	-	4.7363	4.6655	4.5761	4.7845	4.6822	4.4355	4.765	4.2657	4.2402	4.2641	4.1509	4.6147
pos_8880	Rubroskyrin	metab_965	-	HMDB0030865	575.5	pos	-	-	180.64	0.194621	-	-	-	21884-47-9	-	-	-	-	-	-	Benzenoids	Anthracenes	Anthraquinones	3.401	3.4374	3.3978	3.4559	3.3703	3.0779	3.3029	3.2353	3.0483	3.1657	3.388	3.2094
pos_8970	Formamidopyrimidine nucleoside triphosphate	metab_970	C05922	HMDB0006822	580.152	pos	-	-	283.932	0.263255	-	-	-	-	-	-	map01100;map00790	Metabolic pathways; Folate biosynthesis	Metabolism;Metabolism	Global and overview maps;Metabolism of cofactors and vitamins	Organic oxygen compounds	Organooxygen compounds	Carbohydrates and carbohydrate conjugates	3.5481	3.285	3.2802	3.4408	3.5471	3.7289	3.6104	3.7217	3.7089	3.6597	3.476	3.6423
pos_9272	Cer(d18:0/20:0)	metab_985	-	LMSP02020009;HMDB0011764	597.008	pos	-	-	338.646	0.0930312	-	-	-	-	-	-	-	-	-	-	Lipids and lipid-like molecules	Sphingolipids	Ceramides	5.7592	5.7992	5.8188	5.8096	5.7732	5.9007	5.8991	5.9619	5.9206	5.9823	5.9134	5.7839
pos_9722	Z-Arg-Arg-NHMec	metab_1009	C02334	-	622.313	pos	-	-	170.929	0.276974	-	-	-	-	-	-	-	-	-	-	-	-	-	3.6421	3.8776	3.8036	3.757	3.8987	4.0333	3.9907	4.0425	4.0736	4.0435	3.8343	3.9495
pos_9783	Faradiol laurate	metab_1014	-	HMDB0034840	626.033	pos	-	-	338.638	0.139372	-	-	-	270078-40-5	-	-	-	-	-	-	Lipids and lipid-like molecules	Prenol lipids	Triterpenoids	3.4233	3.4176	3.563	3.5042	3.3394	3.548	3.6914	3.7733	3.7123	3.6181	3.6957	3.5838
pos_10193	6''-Malonylapiin	metab_1040	-	HMDB0037601	651.53	pos	-	-	42.6425	0.19727	-	-	-	60478-75-3	-	-	-	-	-	-	Phenylpropanoids and polyketides	Flavonoids	Flavonoid glycosides	4.1946	4.3955	4.2183	4.2157	4.0343	4.0768	4.1304	4.0301	3.9984	3.9739	4.1757	4.0025
pos_10397	PE(16:1(9Z)/14:0)	metab_1055	-	HMDB0008953;LMGP02010516	662.474	pos	-	-	338.671	0.120008	-	-	-	-	-	-	-	-	-	-	Lipids and lipid-like molecules	Glycerophospholipids	Glycerophosphoethanolamines	4.399	4.3808	4.4012	4.386	4.3932	4.4974	4.4919	4.5478	4.5064	4.6162	4.4974	4.3789
pos_10506	Glycerol 1,2-didodecanoate 3-tetradecanoate	metab_1057	-	HMDB0031124	668.07	pos	-	-	20.923	0.11402	-	-	-	60175-30-6	-	-	-	-	-	-	Lipids and lipid-like molecules	Glycerolipids	Triradylcglycerols	4.2336	4.2787	4.4739	5.0347	4.1471	4.0978	3.7042	2.9896	2.926	3.33	4.1023	3.7018
pos_10606	Annonisin	metab_1062	-	HMDB0031394	674.46	pos	-	-	32.1095	0.102584	-	-	-	194413-43-9	-	-	-	-	-	-	Lipids and lipid-like molecules	Fatty Acyls	Fatty alcohols	4.6204	4.6102	4.6287	4.7231	4.8062	4.38	4.2134	4.3616	4.5449	4.4649	4.5371	4.661
pos_10988	Spirolide B	metab_1084	-	HMDB0030492	694.462	pos	-	-	213.98	0.179891	-	-	-	170713-72-1	-	-	-	-	-	-	Organoheterocyclic compounds	Azepines	Not Available	3.3763	3.6061	3.6417	3.5812	3.361	3.1478	3.5187	3.194	3.1887	3.2513	3.5055	3.3381
pos_11170	SM(d18:0/16:1(9Z))	metab_1093	C00550	HMDB0013464	703.572	pos	-	-	161.879	0.0589133	-	-	-	-	Lipids	Phospholipids	map00600;map01100;map04071;map04217	Sphingolipid metabolism; Metabolic pathways; Sphingolipid signaling pathway; Necroptosis	Metabolism;Metabolism;Environmental Information Processing;Cellular Processes	Lipid metabolism;Global and overview maps;Signal transduction;Cell growth and death	Lipids and lipid-like molecules	Sphingolipids	Phosphosphingolipids	4.8264	4.93	4.9613	4.7893	4.5682	4.6223	4.6505	4.6657	4.5264	4.6832	4.7664	4.6075
pos_11312	Pepsinostreptin	metab_1099	C11610	-	710.844	pos	-	-	203.079	0.115551	-	-	-	-	-	-	-	-	-	-	-	-	-	3.5126	3.2734	3.5787	3.6493	3.5112	3.6161	3.6613	3.713	3.5745	3.7923	3.7154	3.7345
pos_11677	SM(d18:1/18:1(11Z))	metab_1117	C00550	HMDB0012100	729.587	pos	-	-	158.653	0.0443317	-	-	-	-	Lipids	Phospholipids	map00600;map01100;map04071;map04217	Sphingolipid metabolism; Metabolic pathways; Sphingolipid signaling pathway; Necroptosis	Metabolism;Metabolism;Environmental Information Processing;Cellular Processes	Lipid metabolism;Global and overview maps;Signal transduction;Cell growth and death	Lipids and lipid-like molecules	Sphingolipids	Phosphosphingolipids	3.8772	4.0173	4.0775	3.9332	3.657	3.5944	3.6286	3.7592	3.6432	3.7326	3.802	3.6733
pos_11723	Gabumine	metab_1120	-	-	732.426	pos	-	-	194.874	0.0859845	-	-	-	-	-	-	-	-	-	-	-	-	-	3.6566	3.9078	3.8297	3.842	3.805	3.9255	3.9457	3.9049	4.0642	3.9149	4.0864	3.9833
pos_11873	PE(18:1(11Z)/16:0)	metab_1128	-	HMDB0009022	740.519	pos	-	-	43.487	0.213282	-	-	-	-	-	-	-	-	-	-	Lipids and lipid-like molecules	Glycerophospholipids	Glycerophosphoethanolamines	4.0306	3.9716	4.2547	3.8666	4.0085	3.8634	3.9238	3.6631	3.67	3.7836	4.0123	3.9293
pos_12355	PC(14:1(9Z)/18:4(6Z,9Z,12Z,15Z))	metab_1149	-	LMGP01011394;HMDB0007910	766.009	pos	-	-	338.677	0.153628	-	-	-	-	-	-	-	-	-	-	Lipids and lipid-like molecules	Glycerophospholipids	Glycerophosphocholines	3.4937	3.6608	3.5669	3.6149	3.5041	3.388	3.325	3.6509	3.3992	3.4211	3.394	3.4332
pos_13785	TG(16:1(9Z)/18:0/16:1(9Z))	metab_1237	-	HMDB0048479	832.321	pos	-	-	252.04	0.0719308	-	-	-	-	-	-	-	-	-	-	Lipids and lipid-like molecules	Glycerolipids	Triradylcglycerols	3.8047	4.0598	4.0391	3.9419	3.9678	4.1841	4.0696	4.029	4.1122	4.1133	4.1178	4.0308
pos_14006	(3x,5x,10x)-9,10-Didehydroisohumbertiol O-[rhamnosyl-(1-&gt	metab_1247	-	-	841.872	pos	-	-	474.762	0.0645626	-	-	-	-	-	-	-	-	-	-	-	-	-	4.1605	4.3094	4.3654	4.2633	4.2384	4.3904	4.391	4.4144	4.4247	4.336	4.354	4.4258
pos_14410	Roxithromycin	metab_1263	C13173	HMDB0014916	859.508	pos	-	-	133.197	0.111753	-	-	-	80214-83-1	-	-	-	-	-	-	Organic oxygen compounds	Organooxygen compounds	Carbohydrates and carbohydrate conjugates	4.0922	4.1502	4.1852	4.1224	4.0696	4.3064	4.2463	4.2113	4.3293	4.1946	4.2023	4.1406
pos_14587	Brevetoxin A	metab_1266	C16839	-	867.48	pos	-	-	338.671	0.159379	-	-	-	-	-	-	-	-	-	-	-	-	-	4.0135	4.1676	4.1612	4.0597	4.1178	4.1671	4.2406	4.2707	4.2925	4.3224	4.1884	4.0806
pos_14982	Fistuloside B	metab_1285	-	HMDB0039004	884.02	pos	-	-	338.673	0.142344	-	-	-	142287-77-2	-	-	-	-	-	-	Lipids and lipid-like molecules	Steroids and steroid derivatives	Steroidal glycosides	3.8734	3.9902	3.9926	3.9651	3.9079	4.0375	4.0806	4.1453	4.0921	4.1146	4.1041	3.927
pos_15743	TG(18:0/o-18:0/22:5(7Z,10Z,13Z,16Z,19Z))	metab_1311	-	HMDB0045475	924.537	pos	-	-	209.426	0.274494	-	-	-	-	-	-	-	-	-	-	Lipids and lipid-like molecules	Glycerolipids	Triradylcglycerols	2.9946	2.919	3.6037	3.428	3.4834	2.4658	2.8232	2.5633	2.8817	2.529	2.7081	2.6413
pos_16138	TG(18:0/20:1(11Z)/20:0)	metab_1320	-	HMDB0044966	946.557	pos	-	-	141.845	0.111113	-	-	-	-	-	-	-	-	-	-	Lipids and lipid-like molecules	Glycerolipids	Triradylcglycerols	3.7508	3.8239	3.8442	3.8421	3.7848	3.9812	3.9167	3.8964	4.0059	3.8639	3.8713	3.8902
pos_16220	Lauroyl-CoA	metab_1327	C01832	HMDB0003571;LMFA07050340	950.843	pos	-	-	338.991	0.267258	-	-	-	6244-92-4	-	-	map01100;map01212;map00062;map00071	Metabolic pathways; Fatty acid metabolism; Fatty acid elongation; Fatty acid degradation	Metabolism;Metabolism;Metabolism;Metabolism	Global and overview maps;Global and overview maps;Lipid metabolism;Lipid metabolism	Organic acids and derivatives	Hydroxy acids and derivatives	Beta hydroxy acids and derivatives	3.5196	3.1586	3.3722	3.434	3.2615	3.3214	3.6392	3.5766	3.5251	3.6443	3.5783	3.4151
pos_17302	UDP-2,3-bis(3-hydroxytetradecanoyl)glucosamine	metab_1365	C04652	-	1019	pos	-	-	338.654	0.209086	-	-	-	-	-	-	map01100	Metabolic pathways	Metabolism	Global and overview maps	-	-	-	3.694	3.8978	3.8654	3.8353	3.7374	3.9458	3.8969	4.0193	4.034	4.0382	3.9334	3.7428
pos_17586	CDP-2,3-bis-(O-phytanyl)-sn-glycerol	metab_1373	C20627	-	1038.66	pos	-	-	327.156	0.10206	-	-	-	-	-	-	-	-	-	-	-	-	-	3.1746	3.3357	3.4816	3.4701	3.5314	3.535	3.4958	3.4525	3.8547	3.5427	3.661	3.6724
pos_18284	YGM 1B	metab_1408	-	HMDB0035460	1098.25	pos	-	-	338.643	0.141079	-	-	-	-	-	-	-	-	-	-	Phenylpropanoids and polyketides	Flavonoids	Flavonoid glycosides	3.4689	3.5842	3.5969	3.4638	3.5136	3.6844	3.66	3.7433	3.6676	3.8205	3.7157	3.5797
pos_19287	3a,7a,12a-Trihydroxy-5b-cholest-24-enoyl-CoA	metab_1438	C05460	LMST01010217;HMDB0006889	1198.4	pos	-	-	244.009	0.0546588	-	-	-	-	-	-	map01100;map00120	Metabolic pathways; Primary bile acid biosynthesis	Metabolism;Metabolism	Global and overview maps;Lipid metabolism	Lipids and lipid-like molecules	Fatty Acyls	Fatty acyl thioesters	3.5562	3.8302	3.8395	3.7027	3.7105	3.8424	3.8321	3.7857	4.0344	3.7744	3.9346	3.918
neg_423	Trifluoroacetic acid	metab_1468	-	HMDB0014118	113.024	neg	-	-	291.162	0.0701464	-	-	-	76-05-1	-	-	-	-	-	-	Organic acids and derivatives	Carboxylic acids and derivatives	Alpha-halocarboxylic acids and derivatives	5.8457	5.7192	5.7578	5.8965	5.5061	5.2223	4.9844	5.7799	5.4902	5.076	5.584	5.6754
neg_568	Hydroxypropanedioic acid	metab_1485	C02287	HMDB0035227	119.062	neg	-	-	23.3435	0.0472633	-	-	-	80-69-3	-	-	-	-	-	-	Organic acids and derivatives	Carboxylic acids and derivatives	Dicarboxylic acids and derivatives	5.5849	5.8415	5.716	5.9166	5.7478	5.4026	5.0875	5.24	5.3423	5.1976	5.3557	5.2742
neg_1177	5-Butyl-2-ethyloxazole	metab_1548	-	HMDB0037862	152.107	neg	-	-	295.259	0.0759895	-	-	-	77311-04-7	-	-	-	-	-	-	Organoheterocyclic compounds	Azoles	Oxazoles	4.5113	4.4345	4.5516	4.5907	3.6763	3.278	3.0499	4.344	3.5534	3.1442	4.1766	3.8999
neg_1279	1,2-Bis(chloromethoxy)ethane	metab_1556	C19348	-	156.99	neg	-	-	307.486	0.114919	-	-	-	-	-	-	-	-	-	-	-	-	-	5.3017	5.2137	5.2499	5.3882	5.3773	5.3531	5.3761	5.4932	5.7239	5.372	5.4285	5.4317
neg_1644	Isovalerylsarcosine	metab_1588	-	HMDB0002087	172.097	neg	-	-	295.519	0.0753716	-	-	-	88127-29-1	-	-	-	-	-	-	Organic acids and derivatives	Carboxylic acids and derivatives	Amino acids, peptides, and analogues	5.7855	5.6592	5.8036	5.8398	4.9508	4.5859	4.2572	5.5558	4.7419	4.402	5.3955	5.0857
neg_2026	N'-Nitrosoatabine	metab_1638	-	-	188.091	neg	-	-	182.077	0.225597	-	-	-	-	-	-	-	-	-	-	-	-	-	3.9331	4.1529	4.0792	4.2383	4.1342	3.8538	3.8802	3.8137	4.1977	3.809	3.9859	3.8702
neg_2190	3-(3,4-Dihydroxyphenyl)-2-methylpropionic acid	metab_1655	-	HMDB0060735	195.065	neg	-	-	35.0025	0.0275072	-	-	-	-	-	-	-	-	-	-	Phenylpropanoids and polyketides	Phenylpropanoic acids	Not Available	4.2892	4.3742	4.3575	4.6866	4.5059	4.7617	4.628	4.5864	4.8615	4.476	4.65	4.693
neg_2293	L-Homocysteic acid	metab_1664	C16511	HMDB0002205	199.029	neg	-	-	23.259	0.141138	-	-	-	14857-77-3	-	-	map04080	Neuroactive ligand-receptor interaction	Environmental Information Processing	Signaling molecules and interaction	Organic acids and derivatives	Carboxylic acids and derivatives	Amino acids, peptides, and analogues	6.0964	6.5616	6.4376	6.482	6.3642	5.9886	5.6998	5.7684	5.868	5.7194	5.9372	5.833
neg_2294	beta-L-fucose	metab_1665	C20836	HMDB0059625	199.036	neg	-	-	200.18	0.0839796	-	-	-	-	-	-	-	-	-	-	Organic oxygen compounds	Organooxygen compounds	Carbohydrates and carbohydrate conjugates	3.3745	3.1855	3.3313	3.2761	3.723	3.7562	3.6968	3.534	3.8293	3.7265	3.4648	4.0571
neg_2359	Penmacric acid	metab_1671	-	HMDB0029436	201.045	neg	-	-	23.2895	0.134905	-	-	-	55297-13-7	-	-	-	-	-	-	Organic acids and derivatives	Carboxylic acids and derivatives	Amino acids, peptides, and analogues	6.5057	6.5226	6.6472	6.366	6.5343	6.9966	6.9201	6.6393	6.8399	6.712	6.9112	6.8414
neg_2360	5-Hydroxymethyluracil	metab_1672	C03088	HMDB0000469	201.056	neg	-	-	225.761	0.182655	-	-	-	4433-40-3	-	-	-	-	-	-	Organoheterocyclic compounds	Diazines	Pyrimidines and pyrimidine derivatives	5.3501	5.6176	5.6374	5.0752	4.8622	4.6	4.7779	4.9126	5.1948	4.7007	4.891	5.1085
neg_2488	L-Albizziine	metab_1685	C08264	-	206.081	neg	-	-	283.517	0.0500023	-	-	-	-	-	-	-	-	-	-	-	-	-	5.1799	4.9982	5.0948	5.2749	4.4521	4.0144	3.7855	5.0558	4.3677	3.9221	4.7723	4.5712
neg_2844	Methabenzthiazuron	metab_1718	C10909	-	220.063	neg	-	-	175.697	0.0644969	-	-	-	-	-	-	-	-	-	-	-	-	-	3.9905	4.1085	3.99	4.3429	4.2031	3.8713	3.9357	3.7975	4.2232	3.6331	3.8274	3.6486
neg_2865	Trichloroacetic acid	metab_1721	C11150	HMDB0042048	220.916	neg	-	-	34.767	0.024023	-	-	-	76-03-9	-	-	map05204;map00980	Chemical carcinogenesis; Metabolism of xenobiotics by cytochrome P450	Human Diseases;Metabolism	Cancer: overview;Xenobiotics biodegradation and metabolism	Organic acids and derivatives	Carboxylic acids and derivatives	Alpha-halocarboxylic acids and derivatives	4.6544	4.4245	4.7843	5.2875	4.9785	5.1693	5.2211	5.301	4.6648	5.4327	5.6322	5.6357
neg_3030	Nitroglycerin	metab_1736	C07455	HMDB0014865	226.003	neg	-	-	68.001	0.0641214	-	-	-	55-63-0	-	-	-	-	-	-	Organic oxygen compounds	Organic oxoanionic compounds	Organic nitrates	5.4726	5.469	5.1368	5.1708	4.9102	4.6131	4.8587	4.7779	5.1257	5.072	5.2484	4.6039
neg_3311	(S)-Tetrahydroprotoberberine	metab_1761	C05204	-	234.133	neg	-	-	316.668	0.0917033	-	-	-	-	-	-	-	-	-	-	-	-	-	4.3496	4.111	4.1879	4.2975	3.5002	3.2872	2.9166	4.0993	3.3605	3.0981	3.8136	3.578
neg_3464	Indolepyruvate	metab_1776	C00331	HMDB0060484	240.018	neg	-	-	76.268	0.109165	-	-	-	35656-49-6	-	-	map01100;map00380	Metabolic pathways; Tryptophan metabolism	Metabolism;Metabolism	Global and overview maps;Amino acid metabolism	Organoheterocyclic compounds	Indoles and derivatives	Indolyl carboxylic acids and derivatives	5.5254	5.4846	5.1397	5.2667	4.9023	4.6889	4.9361	4.5896	5.2565	4.835	5.2663	4.4736
neg_3664	Nigellicine	metab_1800	-	HMDB0030269	245.091	neg	-	-	284.708	0.0795528	-	-	-	98063-20-8	-	-	-	-	-	-	Organoheterocyclic compounds	Benzopyrazoles	Indazoles	4.4242	4.3177	4.2211	4.6138	3.7624	3.5427	3.012	4.3254	3.5971	3.2585	4.1138	3.829
neg_3748	Cysteinyl-Gamma-glutamate	metab_1805	-	HMDB0028789	248.08	neg	-	-	234.482	0.176706	-	-	-	-	-	-	-	-	-	-	Organic acids and derivatives	Carboxylic acids and derivatives	Amino acids, peptides, and analogues	3.4844	3.9197	4.0661	4.2638	4.2623	3.3767	3.698	3.4427	3.9817	3.4868	3.7103	3.5105
neg_3758	Pyridoxine 5'-phosphate	metab_1806	C00627	HMDB0001319	248.149	neg	-	-	295.182	0.0855513	-	-	-	447-05-2	-	-	map01100;map00750	Metabolic pathways; Vitamin B6 metabolism	Metabolism;Metabolism	Global and overview maps;Metabolism of cofactors and vitamins	Organoheterocyclic compounds	Pyridines and derivatives	Pyridoxines	5.1488	5.0659	5.1887	5.2124	4.3437	3.8736	3.652	4.9429	4.1366	3.7275	4.7971	4.4796
neg_4283	4-Methoxybrassinin	metab_1845	-	HMDB0040790	265.054	neg	-	-	126.382	0.0523582	-	-	-	129602-03-5	-	-	-	-	-	-	Organoheterocyclic compounds	Indoles and derivatives	Indoles	4.5963	4.6032	4.6726	4.8352	4.6746	4.3188	4.1341	4.7069	4.5151	4.0908	4.5114	4.463
neg_4597	Panaquinquecol 2	metab_1865	-	HMDB0038938;LMFA05000687	275.166	neg	-	-	32.971	0.0441429	-	-	-	133921-58-1	-	-	-	-	-	-	Lipids and lipid-like molecules	Fatty Acyls	Fatty alcohols	4.4612	4.4857	4.0701	4.0978	3.855	4.2114	4.9813	4.8231	4.4866	5.0141	4.5628	4.4431
neg_4688	Asparaginyl-Phenylalanine	metab_1876	-	HMDB0028738	278.123	neg	-	-	316.722	0.107875	-	-	-	-	-	-	-	-	-	-	Organic acids and derivatives	Carboxylic acids and derivatives	Amino acids, peptides, and analogues	5.5733	5.3136	5.4186	5.5073	4.5743	4.3321	3.9708	5.2739	4.37	4.1938	4.9291	4.6616
neg_4852	Prenyl cis-caffeate	metab_1890	C10487	HMDB0041140	283.08	neg	-	-	210.909	0.0576915	-	-	-	118971-61-2	-	-	-	-	-	-	Phenylpropanoids and polyketides	Cinnamic acids and derivatives	Hydroxycinnamic acids and derivatives	4.4521	4.8828	4.4193	4.239	4.6217	3.7501	3.4187	4.2061	4.1883	4.3194	3.7499	3.8969
neg_5080	Cysteinyl-Glutamate	metab_1906	-	HMDB0028774	289.071	neg	-	-	182.069	0.160205	-	-	-	-	-	-	-	-	-	-	Organic acids and derivatives	Carboxylic acids and derivatives	Amino acids, peptides, and analogues	3.9352	3.9276	4.1854	4.2071	4.0022	3.6404	3.7739	3.9006	3.8397	3.5997	3.7984	3.8311
neg_5213	Arginyl-Cysteine	metab_1917	-	HMDB0028706	293.141	neg	-	-	295.151	0.0943204	-	-	-	-	-	-	-	-	-	-	Organic acids and derivatives	Carboxylic acids and derivatives	Amino acids, peptides, and analogues	5.3828	5.2868	5.4168	5.4473	4.5222	4.0432	3.7709	5.1414	4.3114	3.9052	4.9978	4.682
neg_5272	4-Carboxynevirapine	metab_1924	-	HMDB0060759	295.08	neg	-	-	200.325	0.0517901	-	-	-	-	-	-	-	-	-	-	Lipids and lipid-like molecules	Steroids and steroid derivatives	Estrane steroids	3.6009	3.9224	3.8685	4.1357	4.1088	3.5054	3.4296	3.5267	3.6848	3.3985	3.5741	3.433
neg_5326	Cyclophosphamide	metab_1929	C07888;C06933	HMDB0014672	296.978	neg	-	-	184.812	0.257632	-	-	-	6055-19-2	-	-	map00982	Drug metabolism - cytochrome P450	Metabolism	Xenobiotics biodegradation and metabolism	Organic nitrogen compounds	Organonitrogen compounds	Nitrogen mustard compounds	3.1236	3.1652	2.9896	3.4641	3.2983	3.3235	3.344	3.4706	3.5929	3.5523	3.1735	3.4723
neg_5412	Salicylic acid beta-D-glucoside	metab_1936	-	HMDB0041271	299.084	neg	-	-	330.012	0.138387	-	-	-	10366-91-3	-	-	-	-	-	-	Organic oxygen compounds	Organooxygen compounds	Carbohydrates and carbohydrate conjugates	3.7727	3.841	3.8036	4.1432	4.0923	3.9682	4.0877	4.0978	4.2674	4.0716	4.111	4.1298
neg_5487	Dehydrorabelomycin	metab_1939	C12390	-	301.047	neg	-	-	102.49	0.101816	-	-	-	-	-	-	-	-	-	-	-	-	-	4.0396	3.804	3.8499	4.1416	3.8317	4.2517	4.0752	4.1703	4.0937	4.323	4.0838	3.9455
neg_5528	Norflurazon	metab_1945	C18874	-	302.035	neg	-	-	286.687	0.121955	-	-	-	-	-	-	-	-	-	-	-	-	-	4.8577	4.2805	4.0711	4.3334	3.7315	3.566	3.3027	4.0652	3.5516	3.3417	3.7204	3.8382
neg_5808	Citalopram propionic acid	metab_1963	C16610	HMDB0060463	310.094	neg	-	-	309.745	0.0792492	-	-	-	-	-	-	map00982	Drug metabolism - cytochrome P450	Metabolism	Xenobiotics biodegradation and metabolism	Organoheterocyclic compounds	Isocoumarans	Not Available	4.8657	4.6328	4.6588	4.9721	4.2939	4.047	3.6833	4.8	4.1949	3.9309	4.4178	4.3282
neg_6166	4-(3,4-Dihydroxyphenyl)-2,3-dihydro-2,3-dihydroxy-1H-phenalen-1-one	metab_1996	-	HMDB0037110	321.081	neg	-	-	24.87	0.0741462	-	-	-	-	-	-	-	-	-	-	Benzenoids	Naphthalenes	Phenylnaphthalenes	6.256	5.8504	6.0716	5.8152	5.7891	5.724	5.5708	5.8062	5.4095	5.576	5.2682	5.403
neg_6322	Niclosamide	metab_2005	-	HMDB0015679	326.122	neg	-	-	283.517	0.0509262	-	-	-	50-65-7	-	-	-	-	-	-	Benzenoids	Benzene and substituted derivatives	Anilides	5.9133	5.7179	5.8173	6.0272	5.0961	4.6239	4.4025	5.7716	5.0311	4.5002	5.4605	5.2186
neg_6623	Benzyl glycinate 4-methylbenzenesulfonate salt	metab_2034	-	-	336.105	neg	-	-	105.681	0.131124	-	-	-	-	-	-	-	-	-	-	-	-	-	4.3229	4.4979	4.5752	4.0199	3.95	3.801	3.6631	3.9502	3.9269	3.7786	4.1295	4.0225
neg_6997	Dicloralurea	metab_2070	-	HMDB0031815	350.847	neg	-	-	34.8965	0.114923	-	-	-	116-52-9	-	-	-	-	-	-	Organic acids and derivatives	Organic carbonic acids and derivatives	Ureas	3.8123	4.8878	4.8536	4.2477	3.4067	3.1981	3.4408	3.6996	3.6717	3.4065	3.5048	3.4306
neg_7006	3-Hydroxy-9-(4-hydroxyphenyl)-1H,3H-naphtho[1,8-cd]pyran-1-one	metab_2073	-	HMDB0039404	351.094	neg	-	-	24.87	0.0810626	-	-	-	-	-	-	-	-	-	-	Benzenoids	Naphthalenes	Phenylnaphthalenes	4.2312	4.1973	4.1449	4.4367	4.3985	3.7099	3.5666	4.524	4.0184	4.0521	3.8022	3.8391
neg_7061	Allithiamine	metab_2078	-	HMDB0031758	353.117	neg	-	-	298.901	0.0707588	-	-	-	554-44-9	-	-	-	-	-	-	Organoheterocyclic compounds	Diazines	Pyrimidines and pyrimidine derivatives	3.6542	3.7337	3.7777	3.9271	3.8232	3.3187	3.5626	3.6584	3.7867	3.4633	3.7414	3.5228
neg_7066	(-)-Aspidospermine	metab_2079	C09042	HMDB0030361	353.23	neg	-	-	101.989	0.107081	-	-	-	466-49-9	-	-	-	-	-	-	Alkaloids and derivatives	Aspidospermatan-type alkaloids	Not Available	4.7919	4.7445	4.6966	4.3415	4.5544	4.6873	4.0447	4.5559	4.1822	4.5065	4.0244	4.0579
neg_7127	Deoxynivalenol	metab_2083	C09747	HMDB0036156	355.132	neg	-	-	296.97	0.121451	-	-	-	51481-10-8	-	-	-	-	-	-	Lipids and lipid-like molecules	Prenol lipids	Sesquiterpenoids	4.5209	4.2421	4.3294	4.4198	3.7696	3.6917	3.3986	4.2586	3.7142	3.5691	4.06	3.7636
neg_7188	N1-(5-Phospho-a-D-ribosyl)-5,6-dimethylbenzimidazole	metab_2088	C04778	HMDB0003882	357.277	neg	-	-	39.358	0.0843446	-	-	-	-	-	-	map01100;map00860	Metabolic pathways; Porphyrin and chlorophyll metabolism	Metabolism;Metabolism	Global and overview maps;Metabolism of cofactors and vitamins	Nucleosides, nucleotides, and analogues	Benzimidazole ribonucleosides and ribonucleotides	Not Available	5.4299	5.4593	5.5234	5.3427	5.3063	5.1565	4.9114	5.0487	5.3976	4.9433	4.863	5.3691
neg_7259	Chloramphenicol	metab_2096	C00918	HMDB0014589	360.082	neg	-	-	271.379	0.0247574	-	-	-	56-75-7	Antibiotics	Others	-	-	-	-	Benzenoids	Benzene and substituted derivatives	Nitrobenzenes	4.8211	4.6265	4.7062	4.943	4.3392	4.0576	3.7549	4.7634	4.1983	3.9251	4.6269	4.481
neg_7437	N-[2-(4-Chloro-phenyl)-acetyl]-N'-(4,7-dimethyl-quizolin-2-yl)-guanidine	metab_2109	-	-	366.116	neg	-	-	105.58	0.0689799	-	-	-	-	-	-	-	-	-	-	-	-	-	4.8417	4.9761	5.0224	4.4301	4.4276	4.3643	4.1518	4.4383	4.4656	4.2294	4.5682	4.4764
neg_7457	3-O-Caffeoyl-1-O-methylquinic acid	metab_2112	-	HMDB0039959	367.102	neg	-	-	257.019	0.173794	-	-	-	-	-	-	-	-	-	-	Organic oxygen compounds	Organooxygen compounds	Alcohols and polyols	5.0324	4.8198	4.8258	5.0814	4.5102	4.4306	4.4725	4.7146	4.4322	4.3781	4.6223	4.6593
neg_7623	N'-Hydroxysaxitoxin	metab_2122	-	HMDB0033664	374.139	neg	-	-	295.961	0.130233	-	-	-	153856-77-0	-	-	-	-	-	-	Phenylpropanoids and polyketides	Saxitoxins, gonyautoxins, and derivatives	Not Available	4.4163	4.3992	4.5135	4.5689	3.9006	3.4388	3.3372	4.2833	3.7287	3.494	4.2333	3.9629
neg_7689	Endrin	metab_2127	C18124	HMDB0031211	376.862	neg	-	-	57.03	0.0384911	-	-	-	72-20-8	-	-	-	-	-	-	Lipids and lipid-like molecules	Prenol lipids	Monoterpenoids	4.1154	4.096	4.1368	4.1661	4.3078	4.3647	4.2331	4.249	4.3337	4.3423	4.1523	4.3839
neg_8017	Nutriacholic acid	metab_2157	-	HMDB0000467	389.266	neg	-	-	111.358	0.0595733	-	-	-	4651-67-6	-	-	-	-	-	-	Lipids and lipid-like molecules	Steroids and steroid derivatives	Bile acids, alcohols and derivatives	5.22	5.5598	5.39	5.4612	5.3726	5.2089	5.0216	5.099	5.4902	4.9507	4.7853	4.9651
neg_8047	Sambucus nigra Degraded cyanogenic glycosides (2'-Epimer)	metab_2160	-	HMDB0035502	390.265	neg	-	-	36.895	0.0258189	-	-	-	-	-	-	-	-	-	-	Organic oxygen compounds	Organooxygen compounds	Carbohydrates and carbohydrate conjugates	5.0296	5.2043	5.3348	5.0821	4.9829	4.9073	4.7935	4.7972	4.7707	4.7429	4.8834	4.868
neg_8128	Stanolone benzoate	metab_2169	C14259	-	393.261	neg	-	-	194.849	0.0318675	-	-	-	-	-	-	-	-	-	-	-	-	-	4.0155	3.7693	3.5566	4.0127	3.4342	3.1638	3.0195	3.4237	3.4575	3.2812	2.9638	3.1974
neg_8296	Daphnoretin methyl ether	metab_2180	-	HMDB0039046	401.048	neg	-	-	23.688	0.146522	-	-	-	3749-38-0	-	-	-	-	-	-	Phenylpropanoids and polyketides	Coumarins and derivatives	Not Available	4.5857	4.5825	4.5701	4.5999	4.461	4.383	4.0614	4.8342	3.93	4.07	3.8479	3.8536
neg_8366	Estradiol-17-phenylpropiote	metab_2187	-	-	403.245	neg	-	-	104.462	0.102095	-	-	-	-	-	-	-	-	-	-	-	-	-	4.2391	4.4904	4.5626	4.4981	4.6185	4.09	4.3582	4.1048	4.4673	4.2605	3.932	4.2053
neg_8369	Lucidone C	metab_2188	-	HMDB0038152	403.245	neg	-	-	149.475	0.156043	-	-	-	-	-	-	-	-	-	-	Lipids and lipid-like molecules	Steroids and steroid derivatives	Oxosteroids	4.5875	4.4767	4.7026	5.207	4.9919	3.7474	3.8149	4.0697	4.6503	3.5935	3.5414	4.1489
neg_8422	3-Oxocholic acid	metab_2194	-	LMST04010443;HMDB0000502	405.26	neg	-	-	188.123	0.0178985	-	-	-	2304-89-4	-	-	-	-	-	-	Lipids and lipid-like molecules	Steroids and steroid derivatives	Bile acids, alcohols and derivatives	4.7481	4.5135	4.8661	5.1404	5.1745	4.0838	4.1558	4.198	4.7206	4.1635	4.0422	4.2804
neg_8763	Stearidonyl carnitine	metab_2224	-	HMDB0006463;LMFA07070106	418.295	neg	-	-	36.087	0.0742144	-	-	-	-	-	-	-	-	-	-	Lipids and lipid-like molecules	Fatty Acyls	Fatty acid esters	4.4592	4.4809	4.6614	4.582	4.3922	4.5309	4.3872	4.2429	4.2481	4.3391	4.4367	4.3818
neg_8836	Rumexoside	metab_2232	-	HMDB0036398	421.115	neg	-	-	291.667	0.0645959	-	-	-	-	-	-	-	-	-	-	Organic oxygen compounds	Organooxygen compounds	Carbohydrates and carbohydrate conjugates	4.1352	3.9181	4.032	4.0715	3.7111	3.5025	3.1524	4.0123	3.7188	3.1943	3.7451	3.8701
neg_8902	Devapamil	metab_2235	C13763	-	423.27	neg	-	-	136.684	0.0526566	-	-	-	-	-	-	-	-	-	-	-	-	-	3.5241	3.8161	3.5527	3.8093	3.9735	3.2883	3.5073	3.3614	3.7955	3.2268	3.1318	3.4792
neg_9005	3a,7a-Dihydroxycholanoic acid	metab_2240	-	HMDB0000384	427.258	neg	-	-	159.403	0.0847705	-	-	-	30634-99-2	-	-	-	-	-	-	Lipids and lipid-like molecules	Steroids and steroid derivatives	Bile acids, alcohols and derivatives	5.0832	5.3297	5.3534	5.0361	5.308	5.0518	4.571	4.9075	5.0995	4.6006	4.6851	4.6739
neg_9046	AK toxin I	metab_2244	C16787	HMDB0030401	429.192	neg	-	-	38.522	0.0346781	-	-	-	85146-09-4	-	-	-	-	-	-	Organic acids and derivatives	Carboxylic acids and derivatives	Amino acids, peptides, and analogues	4.6582	4.6244	4.7663	4.7132	5.5327	6.0042	5.6944	5.4903	6.1386	4.9723	5.1727	5.3632
neg_9104	Diphenhydramine N-glucuronide	metab_2249	-	HMDB0060897	431.206	neg	-	-	43.074	0.0436619	-	-	-	-	-	-	-	-	-	-	Organic acids and derivatives	Carboxylic acids and derivatives	Amino acids, peptides, and analogues	3.9514	3.9219	4.4788	3.7885	4.6269	4.8445	4.632	4.6377	5.0306	4.5016	4.1937	4.6015
neg_9187	Paspaline B	metab_2260	C20587	-	434.287	neg	-	-	145.873	0.0254546	-	-	-	-	-	-	-	-	-	-	-	-	-	4.0507	4.398	4.0672	4.462	4.2978	3.7427	3.7566	3.995	4.1848	3.7294	3.5955	3.7731
neg_9437	3a,6b,7b-Trihydroxy-5b-cholanoic acid	metab_2281	C17726	HMDB0000415	443.252	neg	-	-	181.228	0.150948	-	-	-	2393-59-1	-	-	-	-	-	-	Lipids and lipid-like molecules	Steroids and steroid derivatives	Bile acids, alcohols and derivatives	4.4869	4.8132	4.8427	4.8853	5.1344	4.0651	4.5511	4.3787	4.9886	4.5017	3.9546	4.3542
neg_9438	6-Mercaptopurine ribonucleoside 5'-diphosphate	metab_2282	C16616	HMDB0060660	443.252	neg	-	-	212.054	0.205984	-	-	-	-	-	-	map00983	Drug metabolism - other enzymes	Metabolism	Xenobiotics biodegradation and metabolism	Nucleosides, nucleotides, and analogues	Purine nucleotides	Purine ribonucleotides	4.0369	3.9802	4.5872	4.6108	4.5487	3.1006	3.5991	3.4838	4.0427	3.1384	3.1181	3.4086
neg_9571	Browniine	metab_2289	C08665	-	448.265	neg	-	-	136.544	0.0653093	-	-	-	-	-	-	-	-	-	-	-	-	-	4.0612	4.3792	4.1143	4.3607	4.5218	3.6674	3.9961	3.954	4.5201	3.6825	3.5176	3.922
neg_9588	Ascorbyl palmitate	metab_2292	-	HMDB0039883;LMFA07010788	449.239	neg	-	-	148.05	0.0566001	-	-	-	137-66-6	-	-	-	-	-	-	Lipids and lipid-like molecules	Fatty Acyls	Fatty acid esters	4.0441	4.2596	4.1507	4.3088	4.209	3.7617	3.8249	3.9452	4.1974	3.9321	3.488	3.7832
neg_9797	5-Methyltetrahydrofolic acid	metab_2312	C00440	HMDB0001396	458.183	neg	-	-	316.873	0.114217	-	-	-	134-35-0	-	-	map01100;map01523;map01200;map00670	Metabolic pathways; Antifolate resistance; Carbon metabolism; One carbon pool by folate	Metabolism;Human Diseases;Metabolism;Metabolism	Global and overview maps;Drug resistance: antineoplastic;Global and overview maps;Metabolism of cofactors and vitamins	Organoheterocyclic compounds	Pteridines and derivatives	Pterins and derivatives	3.8465	3.6356	3.7281	3.8304	2.7399	2.8808	2.4789	3.5161	2.6334	2.5119	3.1166	2.8294
neg_9860	Lucidenic acid M	metab_2315	-	HMDB0035973	461.289	neg	-	-	36.543	0.171472	-	-	-	110241-33-3	-	-	-	-	-	-	Phenylpropanoids and polyketides	Flavonoids	O-methylated flavonoids	4.1119	4.0788	4.4732	4.2421	4.6081	4.6766	4.4257	4.3066	4.6174	4.5742	4.5589	4.5877
neg_9906	Dulciol A	metab_2324	-	HMDB0029990	463.218	neg	-	-	137.688	0.114229	-	-	-	175617-23-9	-	-	-	-	-	-	Organoheterocyclic compounds	Benzopyrans	1-benzopyrans	3.7525	3.8982	3.6734	3.9849	4.1239	3.4602	3.6149	3.591	4.0218	3.4324	3.1561	3.6383
neg_9916	Urolithin A-3-O-glucuronide	metab_2326	-	HMDB0029222	463.344	neg	-	-	24.877	0.118175	-	-	-	-	-	-	-	-	-	-	Organic oxygen compounds	Organooxygen compounds	Carbohydrates and carbohydrate conjugates	4.8103	4.5877	4.9205	4.64	4.6762	4.4228	4.5903	4.3464	4.4565	4.4196	4.4239	4.5141
neg_9964	LysoSM(d18:0)	metab_2329	-	HMDB0012082	465.36	neg	-	-	24.607	0.0816972	-	-	-	-	-	-	-	-	-	-	Lipids and lipid-like molecules	Sphingolipids	Phosphosphingolipids	6.2041	6.1382	6.4641	5.9961	5.8138	5.8226	5.8178	5.7392	5.776	5.7172	5.7777	5.9744
neg_10021	Ebastine	metab_2332	-	HMDB0060159	468.3	neg	-	-	182.543	0.0548891	-	-	-	90729-43-4	-	-	-	-	-	-	Benzenoids	Benzene and substituted derivatives	Diphenylmethanes	4.361	4.228	4.3829	4.5206	4.7156	3.6035	4.0692	3.9053	4.4531	3.8902	3.7042	3.951
neg_10025	2-(a-Hydroxyethyl)thiamine diphosphate	metab_2333	C05125	HMDB0003904	468.361	neg	-	-	24.315	0.204083	-	-	-	10055-47-7	-	-	map00020;map00010;map01100;map00620	Citrate cycle (TCA cycle); Glycolysis / Gluconeogenesis; Metabolic pathways; Pyruvate metabolism	Metabolism;Metabolism;Metabolism;Metabolism	Carbohydrate metabolism;Carbohydrate metabolism;Global and overview maps;Carbohydrate metabolism	Organoheterocyclic compounds	Diazines	Pyrimidines and pyrimidine derivatives	4.3024	4.2707	4.5401	4.1405	3.9912	4.0724	3.9945	3.936	4.0297	3.857	3.963	4.0855
neg_10064	2-(2-Methylbutanoyl)-9-(3-methyl-2E-pentenoyl)-2b,9a-dihydroxy-4Z,10(14)-oplopadien-3-one	metab_2338	-	HMDB0040994	470.271	neg	-	-	212.185	0.197048	-	-	-	80514-14-3	-	-	-	-	-	-	Lipids and lipid-like molecules	Prenol lipids	Sesquiterpenoids	3.9319	3.859	4.4674	4.512	4.5057	2.8853	3.5219	3.3098	3.9117	3.0568	3.0353	3.3645
neg_10111	CD 1790	metab_2341	-	HMDB0060809	472.199	neg	-	-	294.914	0.147935	-	-	-	-	-	-	-	-	-	-	Organoheterocyclic compounds	Imidazopyrimidines	Purines and purine derivatives	5.3813	5.3175	5.423	5.4616	4.4706	3.7598	3.4935	5.1197	4.2127	3.5804	4.9836	4.6741
neg_10215	CDP-glycerol	metab_2351	C00513	HMDB0059599	476.259	neg	-	-	147.387	0.139872	-	-	-	-	-	-	map00564	Glycerophospholipid metabolism	Metabolism	Lipid metabolism	Lipids and lipid-like molecules	Glycerophospholipids	CDP-glycerols	4.0573	4.3815	4.278	4.4414	4.3446	3.8457	3.9051	3.8857	4.2682	3.9128	3.6247	3.8924
neg_10311	Pranlukast	metab_2360	-	HMDB0015481	480.184	neg	-	-	296.106	0.114128	-	-	-	103177-37-3	-	-	-	-	-	-	Organoheterocyclic compounds	Benzopyrans	1-benzopyrans	4.3544	4.1356	4.2375	4.2983	3.4698	2.904	2.7354	4.1186	3.3403	2.6488	3.871	3.5762
neg_10315	Taurodeoxycholic acid	metab_2362	C05463	HMDB0000896;LMST05040013	480.27	neg	-	-	129.54	0.116649	-	-	-	516-50-7	-	-	-	-	-	-	Lipids and lipid-like molecules	Steroids and steroid derivatives	Bile acids, alcohols and derivatives	6.1977	6.3865	6.4861	6.2095	6.2118	6.2046	6.1985	5.9865	6.0562	5.8785	6.105	5.624
neg_10452	3,7-Dihydroxy-25-methoxycucurbita-5,23-dien-19-al	metab_2373	-	HMDB0039362	485.358	neg	-	-	47.7815	0.186685	-	-	-	-	-	-	-	-	-	-	Lipids and lipid-like molecules	Steroids and steroid derivatives	Cucurbitacins	4.843	4.8128	4.7931	4.924	4.6352	4.6255	4.4291	4.5734	4.6994	4.7624	4.7566	4.6818
neg_10479	Sofalcone	metab_2375	-	HMDB0042013	487.164	neg	-	-	48.487	0.297634	-	-	-	64506-49-6	-	-	-	-	-	-	Phenylpropanoids and polyketides	Linear 1,3-diarylpropanoids	Not Available	4.0613	4.3625	4.3848	4.013	3.9508	3.891	3.9099	3.5839	3.7939	3.7111	3.8229	3.7143
neg_10484	Prednicarbate	metab_2377	-	HMDB0015262	487.231	neg	-	-	213.804	0.149211	-	-	-	73771-04-7	-	-	-	-	-	-	Lipids and lipid-like molecules	Steroids and steroid derivatives	Pregnane steroids	3.2016	3.4744	3.2985	3.4691	3.7676	2.8536	2.9468	3.1216	3.2678	2.937	2.8327	3.1384
neg_10501	4-Hydroxy duloxetine glucuronide	metab_2380	-	HMDB0060763	488.157	neg	-	-	378.384	0.117284	-	-	-	-	-	-	-	-	-	-	Organic oxygen compounds	Organooxygen compounds	Carbohydrates and carbohydrate conjugates	3.9702	3.7941	3.8246	3.9154	3.6289	3.4282	2.976	3.6735	3.4415	3.2543	3.5315	3.637
neg_10547	Homaline	metab_2384	C10599	-	489.32	neg	-	-	34.644	0.148624	-	-	-	-	-	-	-	-	-	-	-	-	-	4.1127	4.2727	4.4805	4.2588	4.5741	4.6153	4.6113	4.297	4.568	4.6723	4.573	4.5859
neg_10615	Zygadenine	metab_2388	C10831	-	492.304	neg	-	-	133.784	0.0451293	-	-	-	-	-	-	-	-	-	-	-	-	-	4.711	4.8693	5.0385	5.0832	4.8994	4.9397	4.5239	4.6908	4.6138	4.8226	4.5973	4.4278
neg_10675	Isopentenyladenosine-5'-diphosphate	metab_2393	C16426	-	494.319	neg	-	-	116.816	0.20386	-	-	-	-	-	-	-	-	-	-	-	-	-	5.0523	5.4027	5.4775	5.0659	5.2844	5.0316	4.9543	4.678	5.0303	5.3075	4.8135	4.8446
neg_10751	Cucurbitacin S	metab_2400	C08806	LMST01010116	497.307	neg	-	-	218.195	0.0734191	-	-	-	-	-	-	-	-	-	-	-	-	-	3.8863	3.769	3.9566	4.1559	4.1942	3.3167	3.6615	3.5178	4.0457	3.3543	3.1815	3.4129
neg_10822	Limonexic acid	metab_2411	-	HMDB0036075	501.167	neg	-	-	47.78	0.104739	-	-	-	99026-99-0	-	-	-	-	-	-	Lipids and lipid-like molecules	Prenol lipids	Triterpenoids	4.2234	4.3545	4.3783	3.8579	4.2243	4.0958	3.841	4.1414	3.4776	4.0448	3.6858	4.0342
neg_10880	Blumenol C O-[apiosyl-(1-&gt	metab_2416	-	-	503.263	neg	-	-	212.22	0.0391129	-	-	-	-	-	-	-	-	-	-	-	-	-	3.7539	3.5582	3.9271	4.013	4.0158	3.1476	3.3931	3.3561	3.6848	3.0173	2.8828	3.1825
neg_10983	CMP-N-trimethyl-2-aminoethylphosphonate	metab_2426	C05674	HMDB0060072	508.301	neg	-	-	105.766	0.0782921	-	-	-	-	-	-	map01100;map00440	Metabolic pathways; Phosphonate and phosphinate metabolism	Metabolism;Metabolism	Global and overview maps;Metabolism of other amino acids	Organic oxygen compounds	Organooxygen compounds	Carbohydrates and carbohydrate conjugates	7.1503	7.442	7.5795	7.2303	7.0717	7.0483	7.2566	6.8674	6.9558	6.9234	7.1446	6.6813
neg_10988	LysoPC(17:0)	metab_2427	C04230	HMDB0012108	508.336	neg	-	-	173.376	0.0734319	-	-	-	-	Lipids	Phospholipids	map00564;map05231	Glycerophospholipid metabolism; Choline metabolism in cancer	Metabolism;Human Diseases	Lipid metabolism;Cancer: overview	Lipids and lipid-like molecules	Glycerophospholipids	Glycerophosphocholines	5.9737	5.9915	6.0008	6.1101	5.8429	5.9288	5.8375	5.7421	5.7315	5.7581	5.7944	5.8444
neg_11289	LysoPC(0:0/18:0)	metab_2444	-	HMDB0011128	522.351	neg	-	-	110.894	0.173803	-	-	-	4421-58-3	-	-	-	-	-	-	Lipids and lipid-like molecules	Glycerophospholipids	Glycerophosphocholines	4.4842	4.7005	4.9879	4.853	4.5919	4.467	4.6626	4.142	4.4634	4.3942	4.4303	4.1415
neg_11342	Demethyloleuropein	metab_2453	-	HMDB0036121	525.165	neg	-	-	48.247	0.10757	-	-	-	52077-55-1	-	-	-	-	-	-	Phenylpropanoids and polyketides	Flavonoids	Flavonoid glycosides	4.641	4.9207	4.7135	4.3051	4.5356	4.3757	3.9742	4.6028	3.937	4.5674	3.794	4.1151
neg_11469	Trichotomine	metab_2468	C09247	-	531.144	neg	-	-	198.5	0.0718272	-	-	-	-	-	-	-	-	-	-	-	-	-	3	2.9478	3.0539	3.3149	3.2516	3.0505	2.9369	2.6754	2.7618	2.7482	2.5936	2.6924
neg_11855	Simmondsin 2'-ferulate	metab_2494	-	HMDB0035475	550.199	neg	-	-	42.019	0.114474	-	-	-	179466-18-3	-	-	-	-	-	-	Phenylpropanoids and polyketides	Cinnamic acids and derivatives	Hydroxycinnamic acids and derivatives	4.0486	4.1122	4.1681	3.918	3.9724	3.8845	3.7995	3.9493	3.9588	3.9477	3.8011	3.8014
neg_11947	Pateamine	metab_2503	C19917	-	554.302	neg	-	-	175.635	0.0449006	-	-	-	-	-	-	-	-	-	-	-	-	-	6.3257	6.2759	6.4866	6.4738	6.5473	6.841	6.6079	6.4244	6.626	6.5509	6.7605	6.4326
neg_12064	5,7-Dihydroxy-3',4'-dimethoxy-8-(3-hydroxy-3-methylbutyl)-isoflavone 7-glucoside	metab_2512	-	HMDB0034812	561.209	neg	-	-	359.126	0.127887	-	-	-	-	-	-	-	-	-	-	Phenylpropanoids and polyketides	Isoflavonoids	Isoflavonoid O-glycosides	3.5416	3.1948	3.2366	3.4851	2.7118	2.4953	2.1751	3.3855	2.4896	2.309	2.9044	2.8738
neg_12187	Deoxycholic acid 3-glucuronide	metab_2521	C03033	LMST05010046;HMDB0002596	567.311	neg	-	-	110.546	0.044408	-	-	-	72504-58-6	-	-	map01100;map00040;map04976	Metabolic pathways; Pentose and glucuronate interconversions; Bile secretion	Metabolism;Metabolism;Organismal Systems	Global and overview maps;Carbohydrate metabolism;Digestive system	Lipids and lipid-like molecules	Steroids and steroid derivatives	Steroidal glycosides	4.5216	4.8482	4.592	4.7157	4.3631	3.9641	3.8765	4.0784	4.2365	3.7054	3.9833	4.0391
neg_12230	Pyrrhoxanthinol	metab_2522	-	HMDB0035696	569.328	neg	-	-	146.576	0.146025	-	-	-	54369-11-8	-	-	-	-	-	-	Lipids and lipid-like molecules	Prenol lipids	Terpene lactones	4.7108	5.0667	5.0227	5.1546	4.8667	4.1563	4.1007	4.4957	4.6785	4.048	4.1069	4.3964
neg_12431	Lapatinib	metab_2540	-	HMDB0015388	580.052	neg	-	-	339.412	0.182177	-	-	-	388082-78-8	-	-	-	-	-	-	Organoheterocyclic compounds	Diazanaphthalenes	Benzodiazines	4.0834	3.8778	3.8737	4.2065	4.2105	4.2907	4.1118	4.3039	4.3271	4.2294	4.1836	4.1297
neg_12495	Cholic acid glucuronide	metab_2543	-	HMDB0002577;LMST05010044	583.306	neg	-	-	137.167	0.106408	-	-	-	76060-22-5	-	-	-	-	-	-	Lipids and lipid-like molecules	Steroids and steroid derivatives	Steroidal glycosides	4.3544	4.6993	4.533	4.7618	4.7256	3.562	3.854	4.116	4.4022	3.6231	3.5374	4.2572
neg_12613	2-Hydroxyestrone-4-S-glutathione	metab_2551	-	HMDB0012624	590.236	neg	-	-	43.928	0.116654	-	-	-	-	-	-	-	-	-	-	Organic acids and derivatives	Carboxylic acids and derivatives	Amino acids, peptides, and analogues	5.4741	5.3249	5.8425	5.4512	5.1804	5.0862	5.2337	4.9842	5.1998	4.9891	5.3082	4.6248
neg_12668	Obamegine	metab_2555	C06513	-	593.277	neg	-	-	98.88	0.221185	-	-	-	-	-	-	-	-	-	-	-	-	-	4.8442	4.6044	4.7685	4.6326	4.6707	4.3731	4.4709	4.1007	4.3799	4.6114	4.4295	4.4029
neg_12886	24-Acetyl- 25-cinnamoylvulgaroside	metab_2576	-	HMDB0041368	607.342	neg	-	-	82.65	0.0227407	-	-	-	172616-89-6	-	-	-	-	-	-	Lipids and lipid-like molecules	Prenol lipids	Sesterterpenoids	4.0442	4.4372	4.4161	4.258	3.9905	3.889	3.7171	4.0413	4.0239	3.6598	4.1373	4.2122
neg_13025	Penitrem F	metab_2593	C20598	-	616.285	neg	-	-	173.136	0.0302051	-	-	-	-	-	-	-	-	-	-	-	-	-	4.4101	4.4168	4.4208	4.531	4.3641	4.1305	4.306	4.2619	4.2628	4.3012	4.2525	4.3545
neg_13040	Minosaminomycin	metab_2595	C17969	-	617.338	neg	-	-	113.462	0.0981894	-	-	-	-	-	-	-	-	-	-	-	-	-	3.9538	3.7301	3.5418	3.6936	3.4345	3.5948	3.3022	3.3358	3.5442	3.2412	3.2885	3.1619
neg_13133	CE(16:0)	metab_2600	C11251	HMDB0000885;LMST01020005	624.06	neg	-	-	279.382	0.254544	-	-	-	601-34-3	-	-	-	-	-	-	Lipids and lipid-like molecules	Steroids and steroid derivatives	Steroid esters	3.1433	3.1773	2.9193	3.0656	3.4224	3.3742	3.4325	3.3522	3.5121	3.4755	3.2054	3.2582
neg_13294	GDP-D-glycero-alpha-D-manno-heptose	metab_2614	C19881	-	634.364	neg	-	-	195.976	0.0379814	-	-	-	-	-	-	-	-	-	-	-	-	-	2.7847	2.5764	2.9448	3.3095	3.2758	2.3877	2.601	2.6902	2.8631	2.0007	2.293	2.516
neg_13388	(3a,5b,7a,12a)-24-[(carboxymethyl)amino]-1,12-dihydroxy-24-oxocholan-3-yl-b-D-Glucopyranosiduronic acid	metab_2620	-	LMST05010053;LMST05010029;HMDB0002472	640.34	neg	-	-	216.451	0.0436808	-	-	-	99794-78-2	-	-	-	-	-	-	Organic nitrogen compounds	Organonitrogen compounds	Oximes	4.3902	4.1832	4.4545	3.9911	3.6513	3.7554	3.1732	3.903	3.5124	3.0794	3.9654	3.9867
neg_13530	Egonol gentiobioside	metab_2634	-	HMDB0034281	649.224	neg	-	-	378.642	0.168125	-	-	-	-	-	-	-	-	-	-	Phenylpropanoids and polyketides	2-arylbenzofuran flavonoids	Not Available	3.9938	3.7025	3.8238	4.0161	3.1772	2.957	2.6273	3.7714	3.0127	2.792	3.5153	3.5167
neg_13849	Scutellarein 7-glucuronosyl-(1-&gt	metab_2652	-	-	673.44	neg	-	-	41.364	0.138227	-	-	-	-	-	-	-	-	-	-	-	-	-	4.2206	4.2684	4.5664	4.3075	4.2989	4.1171	4.1275	4.1055	4.1026	4.1339	4.1366	4.2594
neg_13939	Mycimicin III	metab_2659	-	-	680.394	neg	-	-	174.322	0.22763	-	-	-	-	-	-	-	-	-	-	-	-	-	3.7024	3.6528	3.599	3.8825	3.3869	3.6634	3.3412	3.4291	3.3132	3.3678	3.5148	3.397
neg_14080	Licorice glycoside E	metab_2670	-	HMDB0031996;LMPK12140032	692.209	neg	-	-	22.547	0.1021	-	-	-	-	-	-	-	-	-	-	Phenylpropanoids and polyketides	Flavonoids	Flavonoid glycosides	4.2657	4.1726	4.4799	5.3591	4.2202	4.4522	3.8461	3.1214	2.9745	3.5766	4.1346	3.4836
neg_14531	Cyclopassifloside X	metab_2701	-	HMDB0036365	733.414	neg	-	-	49.6465	0.138343	-	-	-	301540-82-9	-	-	-	-	-	-	Phenylpropanoids and polyketides	2-arylbenzofuran flavonoids	Not Available	3.576	3.78	3.732	3.8202	3.8532	3.9365	3.7458	3.8054	4.1639	3.8134	4.0209	4.1526
neg_14632	Pseudoargiopinin I	metab_2707	C20096	-	742.497	neg	-	-	44.5095	0.0591798	-	-	-	-	-	-	-	-	-	-	-	-	-	5.5901	5.606	5.459	5.4186	5.3895	5.4889	5.4091	5.1694	5.1076	5.1877	5.2092	5.1544
neg_14652	PE(18:2(9Z,12Z)/P-18:0)	metab_2709	-	HMDB0009115	744.058	neg	-	-	339.419	0.187702	-	-	-	-	-	-	-	-	-	-	Lipids and lipid-like molecules	Glycerophospholipids	Glycerophosphoethanolamines	3.8035	3.7152	3.6951	4.0074	4.0443	4.0282	3.9002	4.1528	4.0762	4.0405	4.0067	3.9344
neg_15485	PC(22:4(7Z,10Z,13Z,16Z)/18:3(6Z,9Z,12Z))	metab_2772	-	LMGP01012080;HMDB0008632	830.583	neg	-	-	123.175	0.177201	-	-	-	-	-	-	-	-	-	-	Lipids and lipid-like molecules	Glycerophospholipids	Glycerophosphocholines	4.6864	4.4128	4.8891	4.4899	4.8424	4.3823	4.3954	4.5233	4.5107	4.4658	4.4657	4.4517
neg_16360	TG(20:0/18:3(9Z,12Z,15Z)/20:2n6)	metab_2825	-	HMDB0046088	922.484	neg	-	-	114.716	0.235305	-	-	-	-	-	-	-	-	-	-	Lipids and lipid-like molecules	Glycerolipids	Triradylcglycerols	4.0616	3.7492	3.7163	3.8575	3.867	4.2704	4.1935	4.1509	4.1494	4.2565	3.8029	4.1204
neg_17876	Valinomycin	metab_2906	C06684	-	1145.62	neg	-	-	171.952	0.18658	-	-	-	-	Antibiotics	Polyketides and nonribosomal peptides	-	-	-	-	-	-	-	3.131	3.3058	3.3009	3.3188	3.5349	3.7855	3.3646	3.5537	3.6802	3.3881	3.4763	3.4972
